# Supplementary material for: ·YlideFluor-CF2Cl: a shelf-stable, versatile electrophilic or radical chlorodifluoromethylating reagent
Source: Royal Society of Chemistry journal article supplement (doi:10.1039/d4qo00600c), 2024-01-01
Supplement: d4qo00600c1.pdf [file d4qo00600c1.pdf]

*Supporting Information*

**YlideFluor-CF<sub>2</sub>Cl: A Shelf-Stable, Versatile electrophilic or Radical**

**Chlorodifluoromethylating Reagent**

Tian Zhang,<sup>a</sup> Yuhan Zhang,<sup>a</sup> Zimeng Li,<sup>b</sup> Botao Wu<sup>b</sup> and Qilong Shen<sup>a,b,\*</sup>

<sup>a</sup>*Henan Institute of Advanced Technology, Zhengzhou University, 97 Wenhua Lu, Zhengzhou, Henan Province, 450003, PR China*

<sup>b</sup>*Key Laboratory of Organofluorine Chemistry, Shanghai Institute of Organic Chemistry, University of Chinese Academy of Sciences, Chinese Academy of Sciences, 345 Lingling Lu, Shanghai, 200032, PR China*

Email: shenql@sioc.ac.cn

## Table of Contents

|                                                                                                                                                    |     |
|----------------------------------------------------------------------------------------------------------------------------------------------------|-----|
| General Information.....                                                                                                                           | S3  |
| Optimization of reactions conditions.....                                                                                                          | S4  |
| General procedures .....                                                                                                                           | S7  |
| General Procedure for Preparation of (Difluoromethyl)(4-nitrophenyl)thioether.....                                                                 | S7  |
| General Procedure for Preparation of (Chlorodifluoromethyl)(4-nitrophenyl) bis(carbomethoxy)methylide ( <b>YlideFluor-CF<sub>2</sub>Cl</b> ) ..... | S7  |
| General Procedure for Chlorodifluoromethylation of Acetoxystyrene Derivatives.....                                                                 | S9  |
| General Procedure for Visible-light-promoted Chlorodifluoromethylative Difunctionalization of Styrene Derivatives.....                             | S13 |
| General procedure for Visible-light-promoted Chlorodifluoromethylation of (Hetero)cycles .....                                                     | S18 |
| General Procedure for Chlorodifluoromethylation of $\beta$ -Ketoesters.....                                                                        | S25 |
| Electroanalysis .....                                                                                                                              | S32 |
| UV–Vis Spectrum of <b>YlideFluor-CF<sub>2</sub>Cl</b> .....                                                                                        | S34 |
| <sup>1</sup> H, <sup>13</sup> C, and <sup>19</sup> F NMR Spectra .....                                                                             | S35 |
| X-Ray Diffraction Data of <b>YlideFluor-CF<sub>2</sub>Cl</b> .....                                                                                 | S98 |

## General Information

All reagents were received from commercial sources. Solvents were freshly dried and degassed according to the purification handbook Purification of Laboratory Chemicals before using.

$^1\text{H}$ ,  $^{13}\text{C}$  and  $^{19}\text{F}$  NMR spectra were acquired on 400 MHz, 125 MHz, 100 MHz, 375 MHz spectrometer (400 MHz for  $^1\text{H}$ ; 100 MHz or 125 MHz for  $^{13}\text{C}$ ; 375 MHz for  $^{19}\text{F}$ ).  $^1\text{H}$  NMR and  $^{13}\text{C}$  NMR chemical shifts were determined relative to internal standard TMS at  $\delta$  0.0 ppm and  $^{19}\text{F}$  NMR chemical shifts were determined relative to  $\text{CFCl}_3$  as internal standard. Chemical shifts ( $\delta$ ) are reported in ppm, and coupling constants ( $J$ ) are in hertz (Hz). The following abbreviations were used to explain the multiplicities: s = singlet, d = doublet, t = triplet, q = quartet, m = multiplet, br = broad. All reactions were monitored by TLC or  $^{19}\text{F}$  NMR. Flash column chromatograph was carried out using 300–400 mesh silica gel at medium pressure.

## Optimization

**Table S1.** Optimization of the reaction conditions for chlorodifluoromethylation of acetoxystyrene derivatives with **YlideFluor-CF<sub>2</sub>Cl**.<sup>a,b</sup>

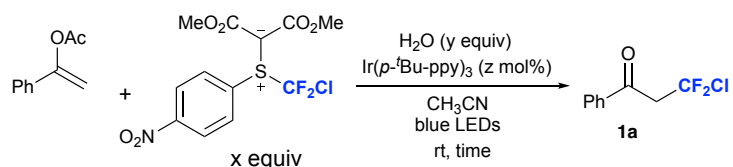

Reaction scheme showing the chlorodifluoromethylation of acetoxystyrene derivatives with **YlideFluor-CF<sub>2</sub>Cl**. The reaction involves acetoxystyrene (Ph-C(OAc)=CH<sub>2</sub>) reacting with **YlideFluor-CF<sub>2</sub>Cl** (x equiv) in the presence of Ir(*p*-Bu-ppy)<sub>3</sub> (z mol%), H<sub>2</sub>O (y equiv), and CH<sub>3</sub>CN solvent under blue LEDs at room temperature for time t. The product is 1-(chlorodifluoromethyl)acetophenone (1a).

| entry | solvent                         | x   | y   | z   | t (h) | yield (%) |
|-------|---------------------------------|-----|-----|-----|-------|-----------|
| 1     | CH <sub>3</sub> CN              | 1.0 | 1.0 | 1.5 | 4     | 66        |
| 2     | toluene                         | 1.0 | 1.0 | 1.5 | 4     | 20        |
| 3     | CH <sub>2</sub> Cl <sub>2</sub> | 1.0 | 1.0 | 1.5 | 4     | 15        |
| 4     | THF                             | 1.0 | 0.0 | 1.5 | 4     | 16        |
| 5     | DMF                             | 1.0 | 2.0 | 1.5 | 4     | 53        |
| 6     | DMSO                            | 1.0 | 3.0 | 1.5 | 4     | 44        |
| 7     | CH <sub>3</sub> CN              | 1.0 | 4.0 | 1.0 | 4     | 57        |
| 8     | CH <sub>3</sub> CN              | 1.0 | 1.0 | 2.0 | 4     | 76        |
| 9     | CH <sub>3</sub> CN              | 1.0 | 1.0 | 3.0 | 4     | 75        |
| 10    | CH <sub>3</sub> CN              | 1.2 | 1.0 | 2.0 | 4     | 77        |
| 11    | CH <sub>3</sub> CN              | 1.5 | 1.0 | 2.0 | 4     | 76        |
| 12    | CH <sub>3</sub> CN              | 1.8 | 1.0 | 2.0 | 4     | 74        |
| 13    | CH <sub>3</sub> CN              | 2.0 | 1.0 | 2.0 | 4     | 77        |
| 14    | CH <sub>3</sub> CN              | 1.0 | 0   | 2.0 | 4     | 42        |
| 15    | CH <sub>3</sub> CN              | 1.0 | 1.0 | 2.0 | 6     | 90        |
| 16    | CH <sub>3</sub> CN              | 1.0 | 1.0 | 2.0 | 8     | 89        |
| 17    | CH <sub>3</sub> CN              | 1.0 | 1.0 | 2.0 | 12    | 78        |
| 18    | CH <sub>3</sub> CN              | 1.0 | 1.0 | 2.0 | 24    | 72        |

<sup>a</sup>Reaction conditions: acetoxystyrene (0.1 mmol), **YlideFluor-CF<sub>2</sub>Cl** (x equiv.), H<sub>2</sub>O (y equiv), catalyst (z mol%), blue LEDs, in solvent (1.0 mL) at room temperature for t h; <sup>b</sup>Yields were determined by <sup>19</sup>F NMR spectroscopy with 1-fluoronaphthalene as an internal standard.

**Table S2.** Optimization of the reaction conditions for visible-light-promoted chlorodifluoromethylative difunctionalization of styrene derivatives with **YlideFluor-CF<sub>2</sub>Cl**.<sup>a,b</sup>

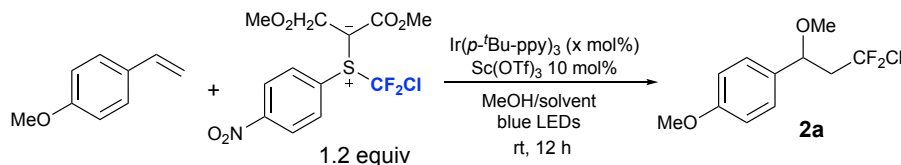

| entry | solvent                         | x   | variation                    | yield (%) |
|-------|---------------------------------|-----|------------------------------|-----------|
| 1     | DMSO                            | 1   | -                            | 34        |
| 2     | DMF                             | 1   | -                            | 65        |
| 3     | THF                             | 1   | -                            | 69        |
| 4     | CH <sub>2</sub> Cl <sub>2</sub> | 1   | -                            | 99        |
| 5     | CH <sub>3</sub> CN              | 1   | -                            | 72        |
| 6     | CH <sub>2</sub> Cl <sub>2</sub> | 1   | 6 h                          | 80        |
| 7     | CH <sub>2</sub> Cl <sub>2</sub> | 0.5 | -                            | 79        |
| 8     | CH <sub>2</sub> Cl <sub>2</sub> | 1   | in air                       | ND        |
| 9     | CH <sub>2</sub> Cl <sub>2</sub> | 1   | no BLEDs                     | ND        |
| 10    | CH <sub>2</sub> Cl <sub>2</sub> | 1   | no $\text{Sc}(\text{OTf})_3$ | 46        |

<sup>a</sup>Reaction conditions: 4-methoxystyrene (0.1 mmol), **YlideFluor-CF<sub>2</sub>Cl** (0.12 mmol),  $\text{Ir}(p\text{-}t\text{Bu-ppy})_3$  (x mol%),  $\text{Sc}(\text{OTf})_3$  (10 mol%) and methanol (0.2 mL) in solvent (2.0 mL) at room temperature react for 12 h; <sup>b</sup>Yields were determined by <sup>19</sup>F NMR spectroscopy with benzotrifluoride as an internal standard.

**Table S3.** Optimization of the reaction conditions for chlorodifluoromethylation of (hetero)cycles with **YlideFluor-CF<sub>2</sub>Cl**.<sup>a,b</sup>

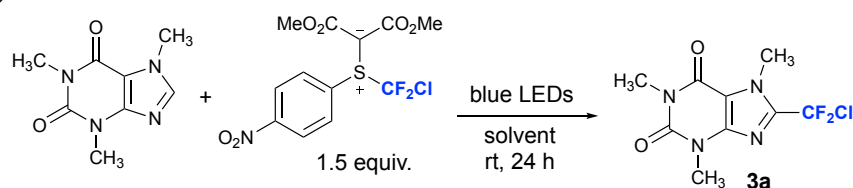

| entry | solvent                         | cat. (2 mol%)                          | yield (%) |
|-------|---------------------------------|----------------------------------------|-----------|
| 1     | CH <sub>3</sub> CN              | $\text{Ir}(\text{ppy})_3$              | 55        |
| 2     | CH <sub>2</sub> Cl <sub>2</sub> | $\text{Ir}(\text{ppy})_3$              | 29        |
| 3     | CH <sub>3</sub> CN              | -                                      | 40        |
| 4     | DMSO                            | $\text{Ir}(\text{ppy})_3$              | 68        |
| 5     | DMF                             | $\text{Ir}(\text{ppy})_3$              | 23        |
| 6     | DMSO                            | $\text{Ir}(p\text{-}t\text{Bu-ppy})_3$ | 72        |

<sup>a</sup>Reaction conditions: caffeine (0.1 mmol), **YlideFluor-CF<sub>2</sub>Cl** (0.15 mmol) and [Ir] catalyst (2 mol%) in solvent (1.0 mL) at room temperature react for 24 h under blue LEDs; <sup>b</sup>Yields were determined by <sup>19</sup>F NMR spectroscopy with benzotrifluoride as an internal standard.

**Table S4.** Optimization of the reaction conditions for chlorodifluoromethylation of  $\beta$ -ketoesters.<sup>a,b</sup>

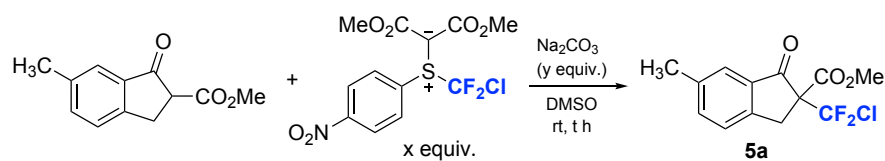

| entry | x   | y   | t (h) | yield (%) |
|-------|-----|-----|-------|-----------|
| 1     | 1.0 | 2.0 | 10    | 70        |
| 2     | 1.2 | 2.0 | 10    | 79        |
| 3     | 1.5 | 2.0 | 10    | 74        |
| 4     | 2.0 | 2.0 | 10    | 74        |
| 5     | 1.2 | 0.5 | 10    | 62        |
| 6     | 1.2 | 1.5 | 10    | 63        |
| 7     | 1.2 | 1.5 | 10    | 85        |
| 8     | 1.2 | 1.5 | 4     | 36        |
| 9     | 1.2 | 1.5 | 6     | 65        |
| 10    | 1.2 | 1.5 | 8     | 80        |
| 11    | 1.2 | 1.5 | 12    | 92        |

<sup>a</sup>Reaction conditions:  $\beta$ -ketoesters (0.1 mmol), **YlideFluor-CF<sub>2</sub>Cl** (x equiv.) and Na<sub>2</sub>CO<sub>3</sub> (y equiv.) in DMSO (1.0 mL) react for t h; <sup>b</sup>Yields were determined by <sup>19</sup>F NMR spectroscopy with 1-fluoronaphthalene as an internal standard.

## General procedures

### General Procedure for Preparation of (Difluoromethyl)(4-nitrophenyl)thioether

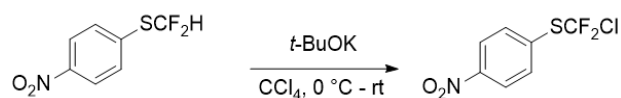

A mixture of (difluoromethyl)(4-nitrophenyl)thioether (10.3 g, 50.0 mmol) and *t*-BuOK (28.1 g, 250 mmol) in CCl<sub>4</sub> (200 mL) was stirred at 0 °C for 0.5 h and then was allowed to warm to room temperature for 12 h. Upon completion, Water (100 mL) was added to the reaction mixture. The organic layer was separated and the aqueous layer was extracted with CH<sub>2</sub>Cl<sub>2</sub> (100 mL × 3). The combined organic layer was washed with brine (100 mL × 3) and dried over Na<sub>2</sub>SO<sub>4</sub>. The solvent was removed under vacuum and the residue was purified by chromatography to give the pure desired product (chlorodifluoromethyl)(4-nitrophenyl)thioether (8.6 g, 72%).

### General Procedure for Preparation of (Chlorodifluoromethyl)(4-nitrophenyl)bis(carbomethoxy)methylide (YlideFluor-CF<sub>2</sub>Cl)

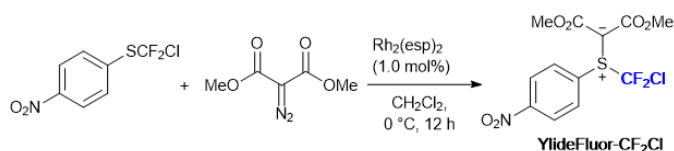

To an oven-dried 350-mL Schlenk tube was added Rh<sub>2</sub>(esp)<sub>2</sub> (152 mg, 1.0 mol%), dichloromethane (50 mL) and (chlorodifluoromethyl)(4-nitrophenyl)thioether (4.78 g, 20.0 mmol) under an atmosphere of argon. The mixture was cooled to 0 °C and dimethyl 2-diazomalonate (4.74 g, 30.0 mmol) was added dropwise. The mixture was stirred at 0 °C for 12 h and then was allowed to warm to room temperature. The solvent was removed under vacuum. The residue was purified by chromatography to give YlideFluor-CF<sub>2</sub>Cl (5.8 g, 78%).

### (Chlorodifluoromethyl)(4-nitrophenyl)bis(carbomethoxy)methylide (YlideFluor-CF<sub>2</sub>Cl)

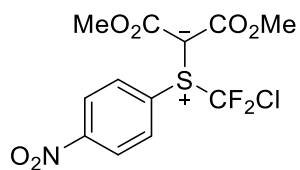

Yellow solid(5.8 g, 78%). **m.p.:** 77-79 °C.

**<sup>1</sup>H NMR** (400 MHz, CDCl<sub>3</sub>) δ 8.40 (d, *J* = 9.0 Hz, 2 H), 7.97 (d, *J* = 8.6 Hz, 2 H), 3.76 (s, 6 H);

**<sup>13</sup>C NMR** (126 MHz, CDCl<sub>3</sub>) δ 165.3, 150.0, 131.1, 131.0 (t, *J* = 352.7 Hz), 130.0, 124.9, 57.23 (d, *J* = 2.0 Hz), 51.9;

**<sup>19</sup>F NMR** (471 MHz, CDCl<sub>3</sub>) δ -33.27 (d, *J* = 110.9 Hz), -35.80 (d, *J* = 110.8 Hz) ppm.

**HRMS** (DART POS) for C<sub>12</sub>H<sub>11</sub>ClF<sub>2</sub>NO<sub>6</sub>S (M+H<sup>+</sup>) Calcd: 369.9958; Found: 369.9958.

**IR** (KBr)  $\nu_{\text{max}}$  = 3101, 2952, 1702, 1659, 1530, 1310, 1240, 1107, 855, 772 cm<sup>-1</sup>.



## General Procedure for Visible-light-promoted Chlorodifluoromethylation of Acetoxystyrene Derivatives

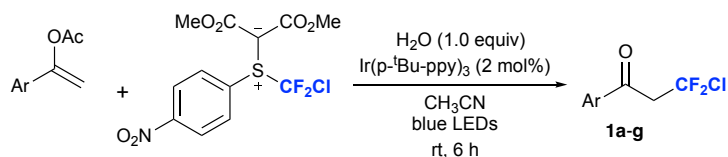

To a 25 mL Schlenk tube equipped with a magnetic stirring bar was added reagent YlideFluor-CF<sub>2</sub>Cl (180 mg, 0.500 mmol), Ir(*p*-<sup>t</sup>Bu-ppy)<sub>3</sub> (8.2 mg, 2.0 mol%), 1-phenylvinyl acetate (81 mg, 0.50 mmol), H<sub>2</sub>O (10 mg, 0.50 mmol) and MeCN (5.0 mL) under argon atmosphere. The mixture was stirred at room temperature under blue LEDs irradiation for 6 h. Water was added to the reaction mixture. The organic layer was separated and the aqueous layer was extracted with ethyl acetate (10 mL × 3). The combined organic layer were washed with brine (10 mL × 3) and dried over Na<sub>2</sub>SO<sub>4</sub>. The solvent was removed under vacuum and the residue was purified by chromatography to give 3-chloro-3,3-difluoro-1-phenylpropan-1-one **1a**.

### 3-Chloro-3,3-difluoro-1-phenylpropan-1-one **1a**

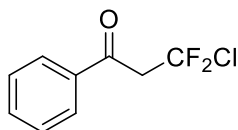

Yellow oil (86 mg, 84%).

<sup>1</sup>H NMR (600 MHz, CDCl<sub>3</sub>) δ 7.93 (d, *J* = 7.2 Hz, 2 H), 7.62 (t, *J* = 7.5 Hz, 1 H), 7.50 (t, *J* = 7.8 Hz, 2 H), 4.00 (t, *J* = 12.3 Hz, 2 H);

<sup>13</sup>C NMR (151 MHz, CDCl<sub>3</sub>) δ 190.0, 135.9, 134.2, 128.9, 128.4, 125.8 (t, *J* = 292.9 Hz), 48.9 (t, *J* = 24.0 Hz);

<sup>19</sup>F NMR (565 MHz, CDCl<sub>3</sub>) δ -48.35 (t, *J* = 12.1 Hz, 2 F) ppm.

HRMS (EI) for C<sub>9</sub>H<sub>7</sub>ClF<sub>2</sub>O (M<sup>+</sup>) Calcd: 204.0148; Found: 204.0147.

IR (KBr): ν<sub>max</sub> = 3065, 2930, 1701, 1598, 1361, 1252, 1022, 758, 687, 571 cm<sup>-1</sup>.

### 1-([1,1'-Biphenyl]-4-yl)-3-chloro-3,3-difluoropropan-1-one **1b**

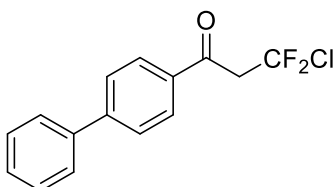

White solid (118 mg, 84%), **m.p.**: 106-108 °C.

**<sup>1</sup>H NMR** (500 MHz, CDCl<sub>3</sub>) δ 8.02 (d, *J* = 8.5 Hz, 2 H), 7.73 (d, *J* = 8.5 Hz, 2 H), 7.64 (d, *J* = 7.0 Hz, 2 H), 7.49 (t, *J* = 7.5 Hz, 2 H), 7.43 (t, *J* = 7.3 Hz, 1 H), 4.03 (t, *J* = 12.3 Hz, 2 H);

**<sup>13</sup>C NMR** (126 MHz, CDCl<sub>3</sub>) δ 189.5, 146.8, 139.4, 134.5, 129.1, 129.0, 128.5, 127.5, 127.3, 125.7 (t, *J* = 293.5 Hz), 48.9 (t, *J* = 23.8 Hz);

**<sup>19</sup>F NMR** (471 MHz, CDCl<sub>3</sub>) δ -48.17 (t, *J* = 12.2 Hz, 2 F) ppm.

**HRMS** (EI) for C<sub>15</sub>H<sub>11</sub>ClF<sub>2</sub>O (M<sup>+</sup>) Calcd: 280.0461; Found: 280.0463.

**IR** (KBr): ν<sub>max</sub> = 3354, 2961, 1936, 1686, 1360, 1192, 952, 766, 695, 571 cm<sup>-1</sup>.

### 3-Chloro-3,3-difluoro-1-(4-iodophenyl)propan-1-one **1c**

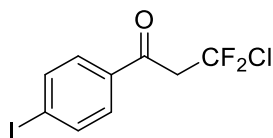

White solid (113 mg, 69%), **m.p.**: 74-76 °C.

**<sup>1</sup>H NMR** (500 MHz, CDCl<sub>3</sub>) δ 7.88 (d, *J* = 10.0 Hz, 2 H), 7.64 (d, *J* = 10.0 Hz, 2 H), 3.95 (t, *J* = 12.5 Hz, 2 H);

**<sup>13</sup>C NMR** (126 MHz, CDCl<sub>3</sub>) δ 189.1, 138.0, 134.8, 127.5, 125.2 (t, *J* = 293.6 Hz), 102.3, 48.5 (t, *J* = 23.9 Hz);

**<sup>19</sup>F NMR** (471 MHz, CDCl<sub>3</sub>) δ -48.32 (t, *J* = 14.1 Hz, 2 F) ppm.

**HRMS** (EI) for C<sub>9</sub>H<sub>6</sub>OCIF<sub>2</sub>I (M<sup>+</sup>) Calcd: 329.9114; Found: 229.9118.

**IR** (KBr): ν<sub>max</sub> = 3083, 2929, 1694, 1581, 1364, 1186, 1098, 1020, 959, 812 cm<sup>-1</sup>.

### 1-(4-Bromophenyl)-3-chloro-3,3-difluoropropan-1-one **1d**

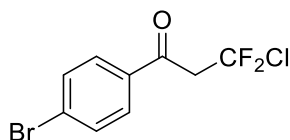

Yellow oil (76 mg, 54%).

**<sup>1</sup>H NMR** (400 MHz, CDCl<sub>3</sub>) δ 7.80 (d, *J* = 8.0 Hz, 2 H), 7.66 (d, *J* = 12.0 Hz, 2 H), 3.96 (t, *J* = 12.0 Hz, 2 H);

**<sup>13</sup>C NMR** (126 MHz, CDCl<sub>3</sub>) δ 188.8, 140.9, 134.2, 129.8, 129.3, 125.5 (t, *J* = 242.6 Hz), 48.9 (t, *J* = 20.2 Hz);

$^{19}\text{F}$  NMR (471 MHz,  $\text{CDCl}_3$ )  $\delta$  -48.31 (t,  $J$  = 11.8 Hz, 2 F) ppm.

HRMS (EI) for  $\text{C}_9\text{H}_6\text{BrClF}_2\text{O}$  ( $\text{M}^+$ ) Calcd: 281.9253; Found: 281.9256.

IR (KBr):  $\nu_{\text{max}}$  = 3377, 2933, 1695, 1585, 1409, 1367, 1249, 1186, 1099, 1021  $\text{cm}^{-1}$ .

### 3-Chloro-3,3-difluoro-1-(4-fluorophenyl)propan-1-one 1e

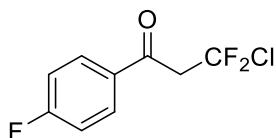

Yellow oil (79 mg, 71%).

$^1\text{H}$  NMR (500 MHz,  $\text{CDCl}_3$ )  $\delta$  8.04 – 7.98 (m, 2 H), 7.18 (t,  $J$  = 7.5 Hz, 2 H), 3.97 (t,  $J$  = 12.5 Hz, 2 H);

$^{13}\text{C}$  NMR (126 MHz,  $\text{CDCl}_3$ )  $\delta$  188.40, 166.3 (d,  $J$  = 258.3 Hz), 132.3, 131.2 (d,  $J$  = 8.8 Hz), 125.54 (t,  $J$  = 293.6 Hz), 116.2 (d,  $J$  = 22.7 Hz), 48.9 (t,  $J$  = 23.9 Hz);

$^{19}\text{F}$  NMR (471 MHz,  $\text{CDCl}_3$ )  $\delta$  -48.32 (t,  $J$  = 11.8 Hz, 2 F), -102.87 (m, 1 F) ppm.

HRMS (EI) for  $\text{C}_9\text{H}_6\text{ClF}_3\text{O}$  ( $\text{M}^+$ ) Calcd: 222.0054; Found: 222.0048.

IR (KBr):  $\nu_{\text{max}}$  = 3079, 2933, 1701, 1600, 1508, 1414, 1362, 1230, 1160, 1089  $\text{cm}^{-1}$ .

### 3-Chloro-3,3-difluoro-1-(o-tolyl)propan-1-one 1f

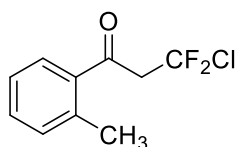

Yellow oil (84 mg, 77%).

$^1\text{H}$  NMR (500 MHz,  $\text{CDCl}_3$ )  $\delta$  7.61 (d,  $J$  = 10.0 Hz, 1 H), 7.44 (t,  $J$  = 7.5 Hz, 1 H), 7.31 (t,  $J$  = 7.5 Hz, 2 H), 3.95 (t,  $J$  = 12.5 Hz, 2 H), 2.54 (s, 3 H);

$^{13}\text{C}$  NMR (126 MHz,  $\text{CDCl}_3$ )  $\delta$  193.1, 139.5, 136.1, 132.5, 132.4, 128.8, 125.9, 125.7 (t,  $J$  = 293.9 Hz), 51.2 (t,  $J$  = 23.3 Hz), 21.5;

$^{19}\text{F}$  NMR (471 MHz,  $\text{CDCl}_3$ )  $\delta$  -48.22 (t,  $J$  = 11.8 Hz, 2 F) ppm.

HRMS (EI) for  $\text{C}_{10}\text{H}_9\text{ClF}_2\text{O}$  ( $\text{M}^+$ ) Calcd: 218.0309; Found: 218.0307.

IR (KBr):  $\nu_{\text{max}}$  = 3367, 2973, 1699, 1602, 1354, 1222, 1088, 955, 757, 582  $\text{cm}^{-1}$ .

### 3-Chloro-3,3-difluoro-1-(4-(methylthio)phenyl)propan-1-one 1g

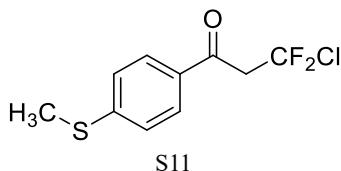

White solid (66 mg, 53%), **m.p.:** 68-70 °C.

**<sup>1</sup>H NMR** (500 MHz, CDCl<sub>3</sub>) δ 7.84 (d, *J* = 10.0 Hz, 2 H), 7.29 (d, *J* = 10.0 Hz, 2 H), 3.95 (t, *J* = 12.5 Hz, 2 H), 2.53 (s, 3 H);

**<sup>13</sup>C NMR** (126 MHz, CDCl<sub>3</sub>) δ 188.9, 147.7, 132.1, 128.8, 125.7 (t, *J* = 291.9 Hz), 125.0, 48.7 (t, *J* = 23.8 Hz), 14.6;

**<sup>19</sup>F NMR** (471 MHz, CDCl<sub>3</sub>) δ -48.14 (t, *J* = 11.8 Hz, 2 F) ppm.

**HRMS** (ESI) for C<sub>10</sub>H<sub>9</sub>ClF<sub>2</sub>SO (M+H<sup>+</sup>) Calcd: 250.0025; Found: 250.0023.

**IR** (KBr):  $\nu_{\max}$  = 3067, 2921, 1921, 1683, 1588, 1356, 1190, 1081, 986 cm<sup>-1</sup>.

## General Procedure for Visible-light-promoted Chlorodifluoromethylative Difunctionalization of Styrene Derivatives

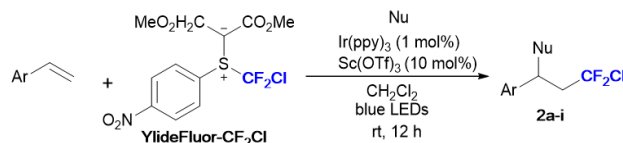

To a 25 mL Schlenk tube equipped with a magnetic stirring bar was added reagent YlideFluor-CF<sub>2</sub>Cl (222 mg, 0.600 mmol), Ir(ppy)<sub>3</sub> (3.3 mg, 1.0 mol%), Sc(OTf)<sub>3</sub> (25 mg, 10 mol%), 4-methoxystyrene (67 mg, 0.50 mmol), MeOH (1.0 mL) and dichloromethane (10 mL) under argon atmosphere. The mixture was stirred at room temperature under blue LEDs irradiation for 12 h. The solvent was removed under vacuum and the residue was purified by chromatography to give 3-chloro-3,3-difluoro-1-(4-methoxyphenyl)propan-1-ol **2a**.

### 1-(3-Chloro-3,3-difluoro-1-methoxypropyl)-4-methoxybenzene **2a**

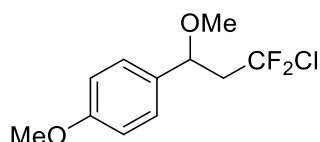

Yellow oil (120 mg, 90%).

<sup>1</sup>H NMR (400 MHz, CDCl<sub>3</sub>) δ 7.24 (d, *J* = 8.7 Hz, 2 H), 6.91 (d, *J* = 8.7 Hz, 2 H), 4.47 (dd, *J* = 8.2, 3.9 Hz, 1 H), 3.81 (s, 3 H), 3.20 (s, 3 H), 2.94 – 2.78 (m, 1 H), 2.63 – 2.47 (m, 1 H);

<sup>13</sup>C NMR (126 MHz, CDCl<sub>3</sub>) δ 159.62, 132.00, 128.22 (t, *J* = 293.58 Hz), 127.85, 114.11, 78.29 (t, *J* = 3.0 Hz), 56.43, 55.30, 49.72 (t, *J* = 22.9 Hz);

<sup>19</sup>F NMR (376 MHz, CDCl<sub>3</sub>) δ -48.01 (ddd, *J* = 160.8, 14.0, 10.4 Hz, 1 F), -49.27 (dt, *J* = 161.2, 13.9 Hz, 1 F) ppm.

HRMS (EI): Calcd for C<sub>11</sub>H<sub>13</sub>O<sub>2</sub>ClF<sub>2</sub>: 250.0567 (M<sup>+</sup>), Found: 250.0571.

IR (KBr): ν<sub>max</sub> = 2937, 2837, 1889, 1613, 1587, 1513, 1465, 1370, 1304, 1251, 1181 cm<sup>-1</sup>

### 1-Chloro-4-(3-chloro-3,3-difluoro-1-methoxypropyl)benzene **2b**

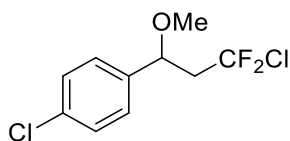

Yellow oil (70 mg, 56%).

$^1\text{H NMR}$  (400 MHz,  $\text{CDCl}_3$ )  $\delta$  7.35 (d,  $J = 8.5$  Hz, 2 H), 7.26 (d,  $J = 8.4$  Hz, 2 H), 4.49 (dd,  $J = 8.1, 4.0$  Hz, 1 H), 3.21 (s, 3 H), 2.92 – 2.75 (m, 1 H), 2.62 – 2.45 (m, 1 H);

$^{13}\text{C NMR}$  (126 MHz,  $\text{CDCl}_3$ )  $\delta$  138.59, 134.16, 129.02, 127.97 (t,  $J = 293.58$  Hz), 127.97, 78.16 (t,  $J = 2.9$  Hz), 56.78, 49.66 (t,  $J = 23.1$  Hz);

$^{19}\text{F NMR}$  (376 MHz,  $\text{CDCl}_3$ )  $\delta$  -48.16 (ddd,  $J = 161.5, 13.9, 10.6$  Hz, 1 F), -49.32 (dt,  $J = 161.2, 13.6$  Hz, 1 F) ppm.

**HRMS** (EI): Calcd for  $\text{C}_{10}\text{H}_{10}\text{OCl}_2\text{F}_2$ : 254.0071( $\text{M}^+$ ), Found: 254.0076.

**IR** (KBr):  $\nu_{\text{max}} = 2936, 2827, 1599, 1490, 1464, 1370, 1210, 1090, 1026, 937$   $\text{cm}^{-1}$

### 1-(*tert*-Butyl)-4-(3-chloro-3,3-difluoro-1-methoxypropyl)benzene 2c

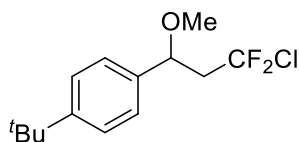

Yellow oil (121 mg, 88%).

$^1\text{H NMR}$  (400 MHz,  $\text{CDCl}_3$ )  $\delta$  7.39 (d,  $J = 6.5$  Hz, 2 H), 7.24 (d,  $J = 6.4$  Hz, 2 H), 4.50 (dd,  $J = 8.9, 2.7$  Hz, 1 H), 3.23 (s, 3 H), 2.94 – 2.77 (m, 1 H), 2.64 – 2.47 (m, 1 H), 1.32 (s, 9 H);

$^{13}\text{C NMR}$  (126 MHz,  $\text{CDCl}_3$ )  $\delta$  151.34, 136.99, 128.32 (t,  $J = 293.58$  Hz), 126.21, 125.66, 78.52 (t,  $J = 2.9$  Hz), 56.73, 49.79 (t,  $J = 22.8$  Hz), 34.61, 31.35;

$^{19}\text{F NMR}$  (376 MHz,  $\text{CDCl}_3$ )  $\delta$  -47.98 (ddd,  $J = 160.8, 14.4, 10.0$  Hz, 1 F), -49.48 (dt,  $J = 160.8, 14.1$  Hz, 1 F) ppm.

**HRMS** (EI): Calcd for  $\text{C}_{14}\text{H}_{19}\text{OClF}_2$ : 276.1087( $\text{M}^+$ ), Found: 276.1084.

**IR** (KBr):  $\nu_{\text{max}} = 2964, 2872, 1614, 1511, 1464, 1364, 1316, 1260, 1214, 1108, 1023, 935, 834$   $\text{cm}^{-1}$

### 2-(3-Chloro-3,3-difluoro-1-methoxypropyl)naphthalene 2d

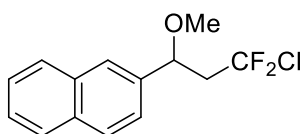

Yellow oil (102 mg, 74%).

$^1\text{H NMR}$  (400 MHz,  $\text{CDCl}_3$ )  $\delta$  7.93 – 7.85 (m, 3 H), 7.81 (s, 1 H), 7.57 – 7.49 (m, 2

H), 7.47 (dd,  $J = 8.5, 1.7$  Hz, 1 H), 4.72 (dd,  $J = 8.3, 3.9$  Hz, 1 H), 3.29 (s, 3 H), 3.06 – 2.92 (m, 1 H), 2.75 – 2.61 (m, 1 H);

$^{13}\text{C}$  NMR (126 MHz,  $\text{CDCl}_3$ )  $\delta$  137.41, 133.40, 133.24, 128.94, 128.27 (t,  $J = 293.3$  Hz), 127.98, 127.83, 126.50, 126.34, 126.09, 123.87, 78.97 (t,  $J = 2.9$  Hz), 56.83, 49.72 (t,  $J = 23.0$  Hz);

$^{19}\text{F}$  NMR (376 MHz,  $\text{CDCl}_3$ )  $\delta$  -47.99 (ddd,  $J = 161.4, 14.4, 10.6$  Hz, 1 F), -49.27 (dt,  $J = 161.1, 13.8$  Hz, 1 F) ppm.

**HRMS (EI):** Calcd for  $\text{C}_{14}\text{H}_{13}\text{OCIF}_2$ : 270.0618 ( $\text{M}^+$ ), Found: 270.0619.

**IR (KBr):**  $\nu_{\text{max}} = 3057, 2934, 1602, 1508, 1464, 1364, 1335, 1254, 1208, 1104, 1025, 938, 858$   $\text{cm}^{-1}$

### 1-(3-Chloro-1-ethoxy-3,3-difluoropropyl)-4-methoxybenzene 2e

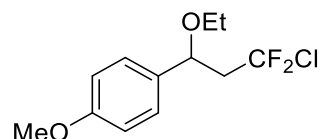

Yellow oil (105 mg, 80%).

$^1\text{H}$  NMR (400 MHz,  $\text{CDCl}_3$ )  $\delta$  7.24 (d,  $J = 7.1$  Hz, 2 H), 6.89 (d,  $J = 7.1$  Hz, 2 H), 4.58 (dd,  $J = 8.5, 4.0$  Hz, 1 H), 3.81 (s, 3 H), 3.43 – 3.26 (m, 2 H), 2.94 – 2.77 (m, 1 H), 2.61 – 2.47 (m, 1 H), 1.16 (t,  $J = 6.3$  Hz, 3 H);

$^{13}\text{C}$  NMR (126 MHz,  $\text{CDCl}_3$ )  $\delta$  159.49, 132.81, 128.30 (t,  $J = 293.3$  Hz), 127.70, 114.04, 76.36 (t,  $J = 3.0$  Hz), 64.15, 55.29, 49.88 (t,  $J = 22.7$  Hz), 15.11;

$^{19}\text{F}$  NMR (376 MHz,  $\text{CDCl}_3$ )  $\delta$  -47.95 (ddd,  $J = 160.7, 14.4, 10.8$  Hz, 1 F), -49.11 (dt,  $J = 160.7, 13.7$  Hz, 1 F) ppm.

**HRMS (EI):** Calcd for  $\text{C}_{12}\text{H}_{15}\text{O}_2\text{ClF}_2$ : 264.0723 ( $\text{M}^+$ ), Found: 264.0719.

**IR (KBr):**  $\nu_{\text{max}} = 2976, 2876, 1612, 1587, 1512, 1464, 1343, 1251, 1101, 1036, 951, 832$   $\text{cm}^{-1}$

### 1-(3-Chloro-3,3-difluoro-1-isopropoxypropyl)-4-methoxybenzene 2f

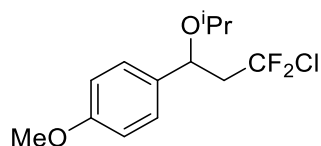

Yellow oil (105 mg, 76%).

**<sup>1</sup>H NMR** (400 MHz, CDCl<sub>3</sub>) δ 7.26 (d, *J* = 8.7 Hz, 2 H), 6.89 (d, *J* = 8.7 Hz, 2 H), 4.71 (dd, *J* = 8.5, 3.6 Hz, 1 H), 3.80 (s, 3 H), 3.55 – 3.41 (m, 1 H), 2.88 – 2.74 (m, 1 H), 2.56 – 2.43 (m, 1 H), 1.16 (d, *J* = 6.1 Hz, 3 H), 1.05 (d, *J* = 6.2 Hz, 3 H);

**<sup>13</sup>C NMR** (126 MHz, CDCl<sub>3</sub>) δ 159.38, 133.63, 128.36 (t, *J* = 293.58 Hz), 127.63, 113.98, 73.70 (t, *J* = 2.9 Hz), 69.22, 55.26, 50.26 (t, *J* = 22.3 Hz), 23.33, 20.95;

**<sup>19</sup>F NMR** (376 MHz, CDCl<sub>3</sub>) δ -47.67 (ddd, *J* = 160.1, 14.0, 10.0 Hz, 1 F), -49.19 (dt, *J* = 160.2, 13.9 Hz, 1 F) ppm.

**HRMS** (EI): Calcd for C<sub>13</sub>H<sub>17</sub>O<sub>2</sub>ClF<sub>2</sub>: 278.0880 (M<sup>+</sup>), Found: 278.0882.

**IR** (KBr): ν<sub>max</sub> = 2973, 2838, 1612, 1587, 1511, 1465, 1420, 1335, 1251, 1098, 1037, 942, 873 cm<sup>-1</sup>

### 1-(1-Azido-3-chloro-3,3-difluoropropyl)-4-methoxybenzene 2g

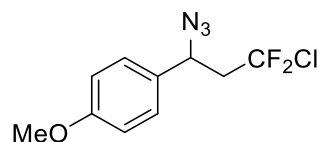

Yellow oil (68 mg, 52%).

**<sup>1</sup>H NMR** (400 MHz, CDCl<sub>3</sub>) δ 7.25 (d, *J* = 8.9 Hz, 2 H), 6.93 (d, *J* = 8.7 Hz, 2 H), 4.80 (dd, *J* = 8.1, 5.2 Hz, 1 H), 3.82 (s, 3 H), 2.75 – 2.87 (m, 1 H), 2.61 – 2.73 (m, 1 H);

**<sup>13</sup>C NMR** (126 MHz, CDCl<sub>3</sub>) δ 160.01, 129.71, 128.14, 127.70 (t, *J* = 292.8 Hz), 114.48, 60.48, 55.35, 47.78 (t, *J* = 23.6 Hz);

**<sup>19</sup>F NMR** (376 MHz, CDCl<sub>3</sub>) δ -49.24 (ddd, *J* = 165.44, 14.2, 11.3 Hz, 1 F), -49.92 (dt, *J* = 163.3, 13.0 Hz, 1 F) ppm.

**HRMS** (EI): Calcd for C<sub>10</sub>H<sub>10</sub>ON<sub>3</sub>ClC<sub>2</sub>F<sub>2</sub>: 261.0475 (M<sup>+</sup>), Found: 261.0477.

**IR** (KBr): ν<sub>max</sub> = 3335, 2960, 2839, 2486, 2150, 1889, 1612, 1586, 1514, 1442, 1370, 1370, 1251, 1097, 1033, 970 cm<sup>-1</sup>

### 1-(1-Azido-3-chloro-3,3-difluoropropyl)-4-(tert-butyl)benzene 2h

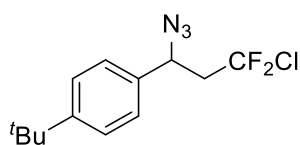

Yellow oil (90 mg, 64%).

**<sup>1</sup>H NMR** (400 MHz, CDCl<sub>3</sub>) δ 7.42 (d, *J* = 8.4 Hz, 2 H), 7.25 (d, *J* = 8.3 Hz, 2 H), 4.82



(dd,  $J = 8.7, 4.4$  Hz, 1 H), 2.91 – 2.74 (m, 1 H), 2.76 – 2.60 (m, 1 H), 1.32 (s, 9 H);  
 $^{13}\text{C}$  NMR (126 MHz,  $\text{CDCl}_3$ )  $\delta$  152.10, 134.85, 127.78 (t,  $J = 293.58$  Hz), 126.41, 126.09, 60.64, 47.76 (t,  $J = 22.68$  Hz), 34.69, 31.26;  
 $^{19}\text{F}$  NMR (376 MHz,  $\text{CDCl}_3$ )  $\delta$  -49.17 (ddd,  $J = 162.9, 14.0, 10.3$  Hz, 1 F), -50.20 (dt,  $J = 162.8, 13.2$  Hz, 1 F) ppm.

**HRMS** (EI): Calcd for  $\text{C}_{13}\text{H}_{16}\text{N}_3\text{ClF}_2$ : 287.0995 ( $\text{M}^+$ ), Found: 287.1001.

**IR** (KBr):  $\nu_{\text{max}} = 3329, 2965, 2486, 2111, 1910, 1613, 1509, 1465, 1419, 1244, 1205, 1100, 1018, 951, 834$   $\text{cm}^{-1}$

**1-(1-Azido-3-chloro-3,3-difluoropropyl)-4-chlorobenzene 2i**

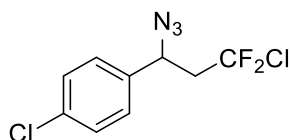

Yellow oil (34 mg, 26%).

$^1\text{H}$  NMR (400 MHz,  $\text{CDCl}_3$ )  $\delta$  7.39 (d,  $J = 6.4$  Hz, 2 H), 7.27 (d,  $J = 6.5$  Hz, 2 H), 4.83 (t,  $J = 5.7$  Hz, 1 H), 2.73 – 2.86 (m, 1 H), 2.59 – 2.72 (m, 1 H);

$^{13}\text{C}$  NMR (126 MHz,  $\text{CDCl}_3$ )  $\delta$  136.31, 134.98, 129.44, 128.18, 127.45 (t,  $J = 293.58$  Hz), 60.32 (t,  $J = 2.9$  Hz), 47.86 (t,  $J = 23.9$  Hz);

$^{19}\text{F}$  NMR (376 MHz,  $\text{CDCl}_3$ )  $\delta$  -49.29 (dt,  $J = 163.3, 12.2$  Hz, 1 F), -50.00 (dt,  $J = 163.5, 12.9$  Hz, 1 F) ppm.

**HRMS** (EI): Calcd for  $\text{C}_9\text{H}_7\text{N}_3\text{Cl}_2\text{F}_2$ : 264.9980 ( $\text{M}^+$ ), Found: 264.9982.

**IR** (KBr):  $\nu_{\text{max}} = 3330, 2923, 2481, 2105, 1903, 1654, 1597, 1493, 1364, 1242, 1094, 1015, 973, 830$   $\text{cm}^{-1}$

## General procedure for Visible-light-promoted chlorodifluoromethylation of (hetero)cycles

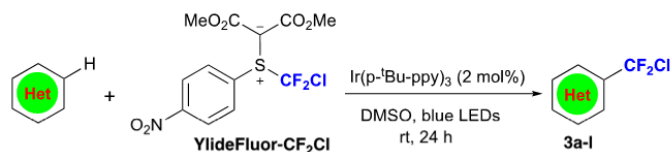

To a 25 mL Schlenk tube equipped with a magnetic stirring bar was added reagent YlideFluor-CF<sub>2</sub>Cl (275 mg, 0.750 mmol), Ir(*p*-<sup>t</sup>Bu-ppy)<sub>3</sub> (8.2 mg, 2.0 mol%), caffeine (85 mg, 0.50 mmol) and DMSO (5.0 mL) under argon atmosphere. The mixture was stirred at room temperature under blue LEDs irradiation for 24 h. Water was added to the reaction mixture. The organic layer was separated and the aqueous layer was extracted with ethyl acetate (10 mL × 3). The combined organic layer was washed with brine (10 mL × 3) and dried over Na<sub>2</sub>SO<sub>4</sub>. The solvent was removed under vacuum and the residue was purified by chromatography to give **3a**.

### 8-(Chlorodifluoromethyl)-1,3,7-trimethyl-3,7-dihydro-1H-purine-2,6-dione **3a**

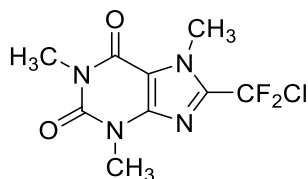

White solid (88 mg, 63%), **m.p.**: 91-93 °C.

<sup>1</sup>H NMR (400 MHz, CDCl<sub>3</sub>) δ 4.16 (s, 3 H), 3.58 (s, 3 H), 3.40 (s, 3 H);

<sup>13</sup>C NMR (126 MHz, CDCl<sub>3</sub>) δ 155.54, 151.35, 146.33, 142.53 (t, *J* = 32.9 Hz), 119.68 (t, *J* = 288.1 Hz), 109.62, 33.46, 29.92, 28.20;

<sup>19</sup>F NMR (376 MHz, CDCl<sub>3</sub>) δ -51.14 ppm.

This compound has been reported by *Org. Lett.* **2017**, *19*, *19*, 5126 – 5129

### 8-(Chlorodifluoromethyl)-1-(3-chloropropyl)-3,7-dimethyl-3,7-dihydro-1H-purine-2,6-dione **3b**

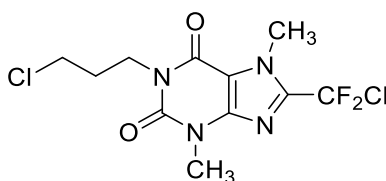

White solid (110 mg, 66%), **m.p.**: 72-73 °C.

<sup>1</sup>H NMR (500 MHz, CDCl<sub>3</sub>) δ 4.18 (t, *J* = 5.0 Hz, 2 H), 4.16 (s, 3 H), 3.61 (t, *J* = 6.6 Hz, 2 H), 3.59 (s, 3 H), 2.13 – 2.19 (m, 2 H);

<sup>13</sup>C NMR (126 MHz, CDCl<sub>3</sub>) δ 155.35, 151.10, 146.48, 142.70 (t, *J* = 33.0 Hz), 119.64 (t, *J* = 288.3 Hz), 109.60, 42.43, 39.53, 33.50 (t, *J* = 2.6 Hz), 31.02, 29.89;

<sup>19</sup>F NMR (470 MHz, CDCl<sub>3</sub>) δ -51.05 ppm.

HRMS (EI): Calcd for C<sub>11</sub>H<sub>12</sub>O<sub>2</sub>N<sub>4</sub>Cl<sub>2</sub>F<sub>2</sub>: 341.0378 (M<sup>+</sup>+H<sup>+</sup>), Found: 341.0380.

IR (KBr): ν<sub>max</sub> = 2961, 2928, 1708, 1666, 1607, 1544, 1503, 1446, 1334, 1366, 1334, 1288, 1231, 1136, 1087, 1000, 870 cm<sup>-1</sup>

**8-(Chlorodifluoromethyl)-7-(2-chloroethyl)-1,3-dimethyl-3,7-dihydro-1*H*-purine-2,6-dione 3c**

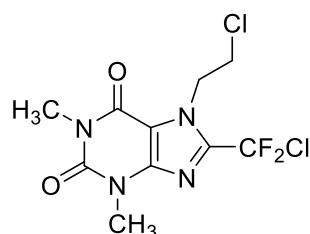

Yellow solid (61 mg, 37%), **m.p.**: 77-78 °C.

<sup>1</sup>H NMR (500 MHz, CDCl<sub>3</sub>) δ 4.81 (t, *J* = 6.8 Hz, 2 H), 3.95 (t, *J* = 6.8 Hz, 2 H), 3.63 (s, 3 H), 3.45 (s, 3 H);

<sup>13</sup>C NMR (126 MHz, CDCl<sub>3</sub>) δ 155.17, 151.23, 146.86, 142.78 (t, *J* = 33.0 Hz), 119.77 (t, *J* = 288.3 Hz), 108.98, 47.84 (t, *J* = 2.8 Hz), 41.37, 30.02, 28.34;

<sup>19</sup>F NMR (376 MHz, CDCl<sub>3</sub>) δ -49.43 ppm.

This compound has been reported by *Eur. J. Org. Chem.* **2022**, e202200607.

**8-(Chlorodifluoromethyl)-1-hexyl-3,7-dimethyl-3,7-dihydro-1*H*-purine-2,6-dione 3d**

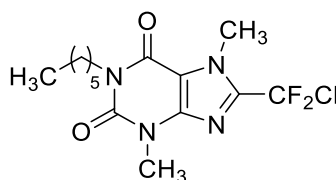

Yellow solid (68 mg, 39%), **m.p.**: 70-72 °C.

<sup>1</sup>H NMR (500 MHz, CDCl<sub>3</sub>) δ 4.17 (s, 3 H), 4.02 – 3.98 (m, 2 H), 3.58 (s, 3 H), 1.68 – 1.60 (m, 2 H), 1.29 – 1.40 (m, 6 H), 0.87 – 0.90 (m, 3 H);

<sup>13</sup>C NMR (126 MHz, CDCl<sub>3</sub>) δ 155.43, 151.11, 146.33, 142.45 (t, *J* = 33.0 Hz), 119.71 (t, *J* = 288.2 Hz), 109.70, 41.79, 33.45, 31.51, 29.83, 27.92, 26.63, 22.56, 14.05;

<sup>19</sup>F NMR (376 MHz, CDCl<sub>3</sub>) δ -51.10 ppm.

HRMS (EI): Calcd for C<sub>14</sub>H<sub>20</sub>O<sub>2</sub>N<sub>4</sub>Cl<sub>2</sub>F<sub>2</sub>: 349.1237 (M<sup>+</sup>+H<sup>+</sup>), Found: 349.1237.

IR (KBr): ν<sub>max</sub> = 2958, 2856, 1712, 1663, 1607, 1544, 1451, 1383, 1332, 1286, 1230, 1132, 1091, 1002, 916 cm<sup>-1</sup>

#### 4-(*tert*-Butyl)-2-(chlorodifluoromethyl)-1-methoxybenzene 3e

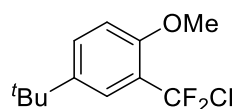

Colorless oil (66 mg, 53%).

<sup>1</sup>H NMR (400 MHz, CDCl<sub>3</sub>) δ 7.53 (d, *J* = 2.5 Hz, 1 H), 7.47 (dd, *J* = 8.7, 2.5 Hz, 1 H), 6.94 (d, *J* = 8.7 Hz, 1 H), 3.91 (s, 3 H), 1.31 (s, 9 H);

<sup>13</sup>C NMR (126 MHz, CDCl<sub>3</sub>) δ 154.44 (t, *J* = 2.8 Hz), 142.89, 129.62, 125.32 (t, *J* = 289.9 Hz), 123.57 (t, *J* = 24.6 Hz), 122.46, 112.02, 56.05, 34.27, 31.37;

<sup>19</sup>F NMR (376 MHz, CDCl<sub>3</sub>) δ -49.01 ppm.

This compound has been reported by *Org. Lett.* **2018**, *20*, *12*, 3491–3495

#### 2-(Chlorodifluoromethyl)-1-methyl-1*H*-indole-3-carbaldehyde 3f

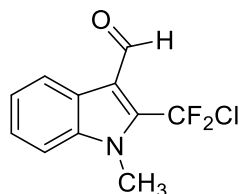

Yellow solid (67 mg, 55%), **m.p.**: 72-74 °C.

<sup>1</sup>H NMR (500 MHz, CDCl<sub>3</sub>) δ 10.43 (s, 1 H), 8.55 (d, *J* = 8.1 Hz, 1 H), 7.51 – 7.44 (m, 2 H), 7.41 (ddd, *J* = 8.1, 6.6, 1.5 Hz, 1 H), 4.00 (s, 3 H);

<sup>13</sup>C NMR (126 MHz, CDCl<sub>3</sub>) δ 185.93 (t, *J* = 7.8 Hz), 137.64, 136.36 (t, *J* = 33.5 Hz), 126.11, 124.35, 124.21, 124.01, 122.28 (t, *J* = 288.8 Hz), 115.70, 109.93, 31.81;

<sup>19</sup>F NMR (376 MHz, CDCl<sub>3</sub>) δ -44.56 ppm.

HRMS (EI): Calcd for C<sub>11</sub>H<sub>8</sub>ONClF<sub>2</sub>: 243.0257 (M<sup>+</sup>), Found: 243.0255.

IR (KBr): ν<sub>max</sub> = 3060, 2879, 1654, 1577, 1524, 1474, 1400, 1366, 1351, 1223, 1169, 1088, 1029, 946, 810 cm<sup>-1</sup>

**Methyl 2-(chlorodifluoromethyl)-1-methyl-1*H*-indole-3-carboxylate 3g**

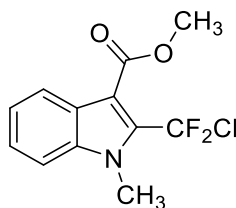

Yellow solid (79 mg, 58%), **m.p.:** 88-90 °C.

**<sup>1</sup>H NMR** (500 MHz, CDCl<sub>3</sub>) δ 8.09 (d, *J* = 8.1 Hz, 1 H), 7.43 (d, *J* = 3.3 Hz, 2 H), 7.33 (dt, *J* = 8.1, 4.0 Hz, 1 H), 4.00 (s, 3 H), 3.97 (t, *J* = 1.9 Hz, 3 H);

**<sup>13</sup>C NMR** (126 MHz, CDCl<sub>3</sub>) δ 164.03, 136.94, 132.99 (t, *J* = 30.9 Hz), 125.29, 125.25, 122.73, 122.51, 121.80 (t, *J* = 288.9 Hz), 110.08, 108.01, 51.90, 32.19;

**<sup>19</sup>F NMR** (376 MHz, CDCl<sub>3</sub>) δ -44.50 ppm.

**HRMS** (EI): Calcd for C<sub>12</sub>H<sub>10</sub>O<sub>2</sub>NCIF<sub>2</sub>: 273.0363 (M<sup>+</sup>), Found:273.0358.

**IR** (KBr): ν<sub>max</sub> = 3077, 2950, 1716, 1576, 1543, 1471, 1436, 1404, 1335, 1274, 1236, 1201, 1112, 1076, 1019, 922 cm<sup>-1</sup>

**5-Bromo-2-(chlorodifluoromethyl)-1-methyl-1*H*-indole-3-carbaldehyde 3h**

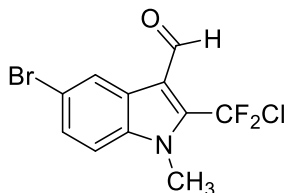

Yellow solid (60 mg, 37%), **m.p.:** 134-136 °C.

**<sup>1</sup>H NMR** (500 MHz, CDCl<sub>3</sub>) δ 10.34 (s, 1 H), 8.69 (d, *J* = 1.9 Hz, 1 H), 7.54 (dd, *J* = 8.9, 2.0 Hz, 1 H), 7.30 (d, *J* = 8.8 Hz, 1 H), 3.96 (s, 3 H);

**<sup>13</sup>C NMR** (126 MHz, CDCl<sub>3</sub>) δ 185.52 (t, *J* = 7.9 Hz), 136.92 (t, *J* = 33.7 Hz), 136.29, 129.29, 126.50, 125.58, 121.92 (t, *J* = 289.0 Hz), 117.93, 114.98, 111.44, 32.03;

**<sup>19</sup>F NMR** (376 MHz, CDCl<sub>3</sub>) δ -45.13 ppm.

**HRMS** (EI): Calcd for C<sub>11</sub>H<sub>7</sub>ONBrCIF<sub>2</sub>: 320.9362 (M<sup>+</sup>), Found: 320.9359.

**IR** (KBr): ν<sub>max</sub> = 3069, 2901, 1654, 1606, 1572, 1522, 1471, 1397, 1342, 1224, 1141, 1087, 1051, 953 cm<sup>-1</sup>

***tert*-Butyl 2-(chlorodifluoromethyl)-6-fluoro-1*H*-indole-1-carboxylate 3i**

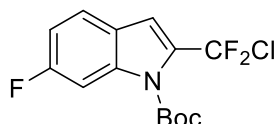

Yellow oil (100 mg, 66%).

$^1\text{H NMR}$  (500 MHz,  $\text{CDCl}_3$ )  $\delta$  7.92 (dd,  $J = 10.6, 2.4$  Hz, 1 H), 7.48 (dd,  $J = 8.6, 5.5$  Hz, 1 H), 7.01 (d,  $J = 0.8$  Hz, 1 H), 6.99 (td,  $J = 8.9, 2.4$  Hz, 1 H), 1.63 (s, 9 H);

$^{13}\text{C NMR}$  (126 MHz,  $\text{CDCl}_3$ )  $\delta$  162.33 (d,  $J = 243.3$  Hz), 148.44, 138.26, 132.17 (t,  $J = 34.0$  Hz), 123.05 (d,  $J = 10.2$  Hz), 122.60, 121.62 (t,  $J = 285.3$  Hz), 112.43 (d,  $J = 24.8$  Hz), 112.22 (t,  $J = 6.1$  Hz), 103.40 (d,  $J = 29.4$  Hz), 86.22, 27.92;

$^{19}\text{F NMR}$  (376 MHz,  $\text{CDCl}_3$ )  $\delta$  -44.53, -112.93 ppm.

**HRMS** (EI): Calcd for  $\text{C}_9\text{H}_5\text{NCIF}_3$ : 319.0057 ( $\text{M}^+$ ), Found: 319.0060.

**IR** (KBr):  $\nu_{\text{max}} = 3130, 2986, 1745, 1632, 1556, 1488, 1435, 1373, 1329, 1297, 1260, 1175, 1141, 1047, 1000, 857$   $\text{cm}^{-1}$

### Ethyl 5-(chlorodifluoromethyl)-1-methyl-1*H*-pyrrole-2-carboxylate **3j**

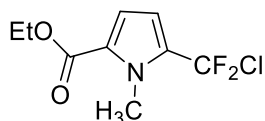

Yellow oil (94 mg, 79%).

$^1\text{H NMR}$  (600 MHz,  $\text{CDCl}_3$ )  $\delta$  6.90 (d,  $J = 4.2$  Hz, 1 H), 6.53 (d,  $J = 4.2$  Hz, 1 H), 4.34 (q,  $J = 7.1$  Hz, 2 H), 4.09 (s, 3 H), 1.39 (t,  $J = 7.1$  Hz, 3H);

$^{13}\text{C NMR}$  (151 MHz,  $\text{CDCl}_3$ )  $\delta$  160.88, 131.59 (t,  $J = 32.3$  Hz), 126.78, 121.80 (t,  $J = 285.39$  Hz), 115.79, 109.72 (t,  $J = 4.2$  Hz), 60.50, 33.81, 14.32;

$^{19}\text{F NMR}$  (376 MHz,  $\text{CDCl}_3$ )  $\delta$  -46.44 ppm.

**HRMS** (EI): Calcd for  $\text{C}_9\text{H}_{10}\text{O}_2\text{NCIF}_2$ : 237.0363 ( $\text{M}^+$ ), Found: 237.0364

**IR** (KBr):  $\nu_{\text{max}} = 2984, 1803, 1717, 1539, 1488, 1397, 1247, 1107, 1035$   $\text{cm}^{-1}$

### 1-(5-(Chlorodifluoromethyl)-1-methyl-1*H*-pyrrol-2-yl)ethan-1-one **3k**

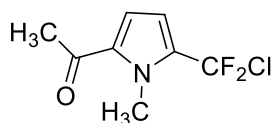

Yellow oil (80 mg, 79%).

$^1\text{H NMR}$  (600 MHz,  $\text{CDCl}_3$ )  $\delta$  6.88 (d,  $J = 4.3$  Hz, 1 H), 6.52 (d,  $J = 4.3$  Hz, 1 H), 4.06

(s, 3 H), 2.48 (s, 3 H);

$^{13}\text{C}$  NMR (151 MHz,  $\text{CDCl}_3$ )  $\delta$  189.83, 133.75, 132.59 (t,  $J = 32.2$  Hz), 121.77 (t,  $J = 285.39$  Hz), 117.40, 109.58 (t,  $J = 4.2$  Hz), 34.46, 27.95;

$^{19}\text{F}$  NMR (376 MHz,  $\text{CDCl}_3$ )  $\delta$  -46.46 ppm.

HRMS (EI): Calcd for  $\text{C}_8\text{H}_8\text{ClF}_2\text{NO}$ : 207.0257 ( $\text{M}^+$ ), Found: 207.0255

IR (KBr):  $\nu_{\text{max}} = 3137, 2965, 1801, 1671, 1535, 1487, 1382, 1341, 1242, 1069$   $\text{cm}^{-1}$

### 5-(Chlorodifluoromethyl)-1-methyl-1H-pyrrole-2-carbaldehyde 3l

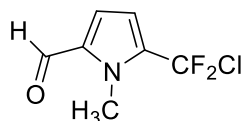

Yellow oil (75 mg, 77%).

$^1\text{H}$  NMR (600 MHz,  $\text{CDCl}_3$ )  $\delta$  9.68 (s, 1 H), 6.87 (d,  $J = 4.2$  Hz, 1 H), 6.60 (d,  $J = 4.2$  Hz, 1 H), 4.10 (s, 3 H);

$^{13}\text{C}$  NMR (151 MHz,  $\text{CDCl}_3$ )  $\delta$  181.13, 134.48, 133.93 (t,  $J = 32.2$  Hz), 121.90, 121.54 (t,  $J = 285.8$  Hz), 110.64 (t,  $J = 4.0$  Hz), 33.81;

$^{19}\text{F}$  NMR (376 MHz,  $\text{CDCl}_3$ )  $\delta$  -46.95 ppm.

HRMS (EI): Calcd for  $\text{C}_7\text{H}_6\text{ClF}_2\text{NO}$ : 193.0100 ( $\text{M}^+$ ), Found: 193.0097

IR (KBr):  $\nu_{\text{max}} = 3139, 2960, 2255, 1682, 1534, 1470, 1390, 1337, 1220, 1114$ ,  $\text{cm}^{-1}$

### General procedure for preparation of 8-(difluoro(trimethylsilyl)methyl)-1-hexyl-3,7-dimethyl-3,7-dihydro-1H-purine-2,6-dione 4

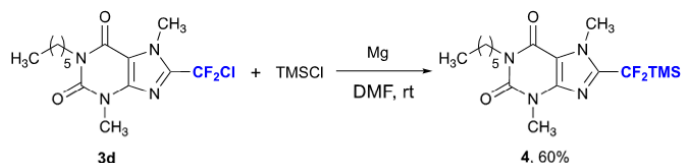

To anhydrous DMF (0.2 mL) were added magnesium powder (4.8 mg, 0.2 mmol) and chlorotrimethylsilane (25  $\mu\text{L}$ , 0.4 mmol) under an atmosphere of argon. Then **3d** (35 mg, 0.10 mmol) was added dropwise. The reaction was exothermic and the mixture was stirred until it turned brown. The mixture was extracted with  $\text{Et}_2\text{O}$  (2.0 mL  $\times$  3). The organic layer washed with  $\text{H}_2\text{O}$  (2.0 mL  $\times$  3), dried over  $\text{MgSO}_4$  and then purified by flash chromatography to afford compound **4** (23 mg, 60%) as a colourless liquid.

**8-(Difluoro(trimethylsilyl)methyl)-1-hexyl-3,7-dimethyl-3,7-dihydro-1H-purine-2,6-dione 4**

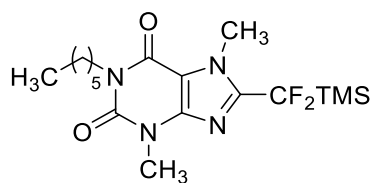

Yellow solid (23 mg, 60%), **m.p.:** 78-80 °C.

**<sup>1</sup>H NMR** (500 MHz, CDCl<sub>3</sub>) δ 4.17 (s, 3 H), 4.05 – 3.97 (m, 2 H), 3.55 (s, 3 H), 1.70 – 1.60 (m, 2 H), 1.42 – 1.31 (m, 6 H), 0.94 – 0.87 (m, 3 H), 0.37 (s, 9 H);

**<sup>13</sup>C NMR** (126 MHz, CDCl<sub>3</sub>) δ 155.59, 151.32, 146.59, 146.13 (t, *J* = 26.3 Hz), 124.14 (t, *J* = 254.9 Hz), 109.01, 41.58, 33.16, 31.54, 29.57, 28.00, 26.66, 22.58, 14.07, -3.95;

**<sup>19</sup>F NMR** (376 MHz, CDCl<sub>3</sub>) δ -111.42 ppm.

**HRMS** (EI): Calcd for C<sub>17</sub>H<sub>28</sub>O<sub>2</sub>N<sub>4</sub>F<sub>2</sub>Si: 386.1944 (M<sup>+</sup>), Found: 386.1942.

**IR** (KBr): ν<sub>max</sub> = 2959, 2857, 1718, 1655, 1607, 1547, 1442, 1290, 1086, 966 cm<sup>-1</sup>



## General Procedure for Chlorodifluoromethylation of $\beta$ -Ketoesters

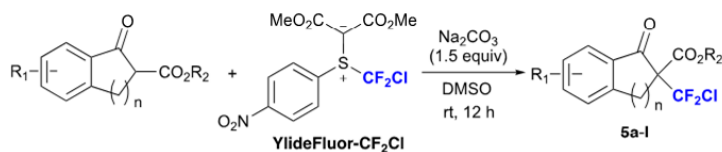

To a 25 mL Schlenk tube equipped with a magnetic stirring bar was added reagent YlideFluor- $CF_2Cl$  (221 mg, 0.600 mmol),  $\beta$ -ketoesters (102 mg, 0.500 mmol),  $Na_2CO_3$  (79 mg, 0.75 mmol) and DMSO (5.0 mL) under argon atmosphere. The mixture was stirred at room temperature for 12 h. Water was added to the reaction mixture. The organic layer was separated and the aqueous layer was extracted with ethyl acetate (10 mL  $\times$  3). The combined organic layer were washed with brine (10 mL  $\times$  3) and dried over  $Na_2SO_4$ . The solvent was removed under vacuum and the residue was purified by chromatography to give **5a**.

### Methyl 2-(chlorodifluoromethyl)-6-methyl-1-oxo-2,3-dihydro-1*H*-indene-2-carboxylate **5a**

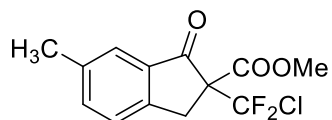

Yellow oil (129 mg, 90%).

$^1H$  NMR (600 MHz,  $CDCl_3$ )  $\delta$  7.60 (s, 1 H), 7.49 (d,  $J = 7.8$  Hz, 1 H), 7.41 (d,  $J = 8.0$  Hz, 1 H), 3.76 (s, 3 H), 3.75 (d,  $J = 18.4$  Hz, 1 H), 3.58 (d,  $J = 17.7$  Hz, 1 H), 2.40 (s, 3 H);

$^{13}C$  NMR (126 MHz,  $CDCl_3$ )  $\delta$  192.9, 165.7, 148.9, 138.6, 137.5, 134.7, 126.8 (t,  $J = 299.9$  Hz), 125.9, 125.2, 67.5 (t,  $J = 21.4$  Hz), 53.4, 35.4, 20.9;

$^{19}F$  NMR (470 MHz,  $CDCl_3$ )  $\delta$  -55.25 (d,  $J = 166.4$  Hz, 1 F),  $\delta$  -56.67 (d,  $J = 166.4$  Hz, 1 F) ppm.

HRMS (EI) for  $C_{13}H_{11}ClF_2O_3$  ( $M^+$ ) Calcd: 288.0359; Found: 288.0358.

IR (KBr):  $\nu_{max} = 2958, 1759, 1618, 1587, 1497, 1283, 1222, 1154, 970$   $cm^{-1}$ .

### Methyl 2-(chlorodifluoromethyl)-1-oxo-2,3-dihydro-1*H*-indene-2-carboxylate **5b**

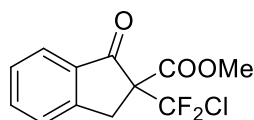

Yellow oil (129 mg, 94%).

$^1\text{H NMR}$  (600 MHz,  $\text{CDCl}_3$ )  $\delta$  7.84 (d,  $J = 6.0$  Hz, 1 H), 7.70 (t,  $J = 6.0$  Hz, 1 H), 7.55 (d,  $J = 6.0$  Hz, 1 H), 7.46 (t,  $J = 9.0$  Hz, 1 H), 3.82 (d,  $J = 18.0$  Hz, 1 H), 3.77 (s, 3 H), 3.67 (d,  $J = 18.0$  Hz, 1 H);

$^{13}\text{C NMR}$  (126 MHz,  $\text{CDCl}_3$ )  $\delta$  192.9, 165.7, 151.4, 136.2, 134.5, 128.4, 126.7 (t,  $J = 300.1$  Hz), 126.2, 125.5, 67.3 (t,  $J = 21.4$  Hz), 53.5, 35.7;

$^{19}\text{F NMR}$  (565 MHz,  $\text{CDCl}_3$ )  $\delta$  -55.05 (d,  $J = 166.6$  Hz, 1 F),  $\delta$  -56.34 (d,  $J = 166.6$  Hz, 1 F) ppm.

**HRMS** (EI) for  $\text{C}_{12}\text{H}_9\text{ClF}_2\text{O}_3$  ( $\text{M}^+$ ) Calcd: 274.0203; Found: 274.0208.

**IR** (KBr):  $\nu_{\text{max}} = 3439, 2958, 2846, 1756, 1607, 1592, 1435, 1275, 1193, 1087$   $\text{cm}^{-1}$ .

**Methyl 2-(chlorodifluoromethyl)-6-fluoro-1-oxo-2,3-dihydro-1H-indene-2-carboxylate 5c**

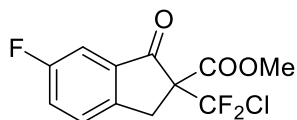

Yellow liquid (143 mg, 98%).

$^1\text{H NMR}$  (500 MHz,  $\text{CDCl}_3$ )  $\delta$  7.51 (dd,  $J = 8.3, 4.1$  Hz, 1 H), 7.43 – 7.37 (m, 2 H), 3.77 – 3.73 (m, 4 H), 3.60 (d,  $J = 17.7$  Hz, 1 H);

$^{13}\text{C NMR}$  (126 MHz,  $\text{CDCl}_3$ )  $\delta$  192.0, 165.3 (d,  $J = 3.5$  Hz), 162.6 (d,  $J = 250.1$  Hz), 146.9, 136.2, 127.8 (d,  $J = 8.1$  Hz), 126.5 (t,  $J = 301.1$  Hz), 124.1 (d,  $J = 24.1$  Hz), 111.1 (d,  $J = 22.6$  Hz), 68.0 (t,  $J = 22.1$  Hz), 53.7, 35.5;

$^{19}\text{F NMR}$  (470 MHz,  $\text{CDCl}_3$ )  $\delta$  -55.50 (d,  $J = 167.1$  Hz, 1 F),  $\delta$  -56.77 (d,  $J = 166.9$  Hz, 1 F), -112.54 (s, 1 F) ppm.

**HRMS** (EI) for  $\text{C}_{12}\text{H}_8\text{ClF}_3\text{O}_3$  ( $\text{M}^+$ ) Calcd: 292.0109; Found: 292.0112.

**IR** (KBr):  $\nu_{\text{max}} = 3072, 2960, 1760, 1492, 1437, 1269, 1224, 1190, 1156, 1056$   $\text{cm}^{-1}$ .

**Methyl 6-bromo-2-(chlorodifluoromethyl)-1-oxo-2,3-dihydro-1H-indene-2-carboxylate 5d**

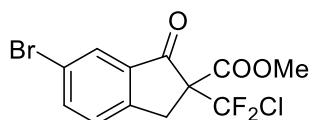

Yellow solid (151 mg, 86%), **m.p.:** 72-74 °C.

**<sup>1</sup>H NMR** (600 MHz, CDCl<sub>3</sub>) δ 7.95 (d, *J* = 1.6 Hz, 1 H), 7.78 (dd, *J* = 8.2, 1.8 Hz, 1 H), 7.42 (d, *J* = 8.2 Hz, 1 H), 3.78 (s, 3 H), 3.75 (d, *J* = 17.9 Hz, 1 H), 3.59 (d, *J* = 17.9 Hz, 1 H);

**<sup>13</sup>C NMR** (126 MHz, CDCl<sub>3</sub>) δ 191.5, 165.2 (d, *J* = 4.1 Hz), 149.9, 139.0, 136.3, 128.3, 127.8, 126.5 (t, *J* = 299.9 Hz), 122.6, 67.8 (t, *J* = 22.1 Hz), 53.7, 35.4;

**<sup>19</sup>F NMR** (565 MHz, CDCl<sub>3</sub>) δ -55.39 (d, *J* = 167.1 Hz, 1 F), δ -56.62 (d, *J* = 167.1 Hz, 1 F) ppm.

**HRMS** (EI) for C<sub>12</sub>H<sub>8</sub>BrClF<sub>2</sub>O<sub>3</sub> (M<sup>+</sup>) Calcd: 351.9313; Found: 351.9308.

**IR** (KBr):  $\nu_{\max}$  = 3033, 2838, 1763, 1599, 1432, 1292, 1204, 1114, 1040, 974 cm<sup>-1</sup>.

**Methyl 2-(chlorodifluoromethyl)-5-fluoro-1-oxo-2,3-dihydro-1H-indene-2-carboxylate 5e**

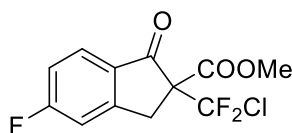

Yellow solid (114 mg, 78%), **m.p.:** 64-96 °C.

**<sup>1</sup>H NMR** (500 MHz, CDCl<sub>3</sub>) δ 7.84 (dd, *J* = 8.5, 5.2 Hz, 1 H), 7.22 – 7.13 (m, 2 H), 3.79 – 3.82 (m, 4 H), 3.63 (d, *J* = 18.0 Hz, 1 H);

**<sup>13</sup>C NMR** (126 MHz, CDCl<sub>3</sub>) δ 190.9, 167.9 (d, *J* = 250.7 Hz), 165.4 (d, *J* = 3.6 Hz), 154.4, 130.9, 128.0 (d, *J* = 11.1 Hz), 126.6 (t, *J* = 300.1 Hz), 117.0 (d, *J* = 24.3 Hz), 113.1 (d, *J* = 22.9 Hz), 67.6 (t, *J* = 22.1 Hz), 53.7, 35.5;

**<sup>19</sup>F NMR** (470 MHz, CDCl<sub>3</sub>) δ -55.51 (d, *J* = 166.8 Hz, 1 F), δ -56.77 (d, *J* = 166.8 Hz, 1 F), -99.2 (s, 1 F) ppm.

**HRMS** (EI) for C<sub>12</sub>H<sub>8</sub>ClF<sub>3</sub>O<sub>3</sub> (M<sup>+</sup>) Calcd: 292.0109; Found: 292.0106.

**IR** (KBr):  $\nu_{\max}$  = 3077, 2963, 1754, 1616, 1481, 1341, 1262, 1151, 1066, 937 cm<sup>-1</sup>.

**Methyl 5-chloro-2-(chlorodifluoromethyl)-1-oxo-2,3-dihydro-1H-indene-2-**

**carboxylate 5f**

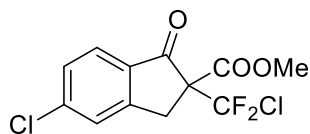

Yellow solid (150 mg, 97%), **m.p.:** 96-98 °C.

**<sup>1</sup>H NMR** (600 MHz, CDCl<sub>3</sub>) δ 7.77 (d, *J* = 6.0 Hz, 1 H), 7.53 (s, 1 H), 7.44 (d, *J* = 6.0 Hz, 1 H), 3.78 (d, *J* = 18.0 Hz, 1 H), 3.78 (s, 3 H), 3.63 (d, *J* = 18.0 Hz, 1 H);

**<sup>13</sup>C NMR** (126 MHz, CDCl<sub>3</sub>) δ 191.4, 165.3, 152.8, 143.0, 133.0, 129.4, 126.6, 126.5, 126.5 (t, *J* = 300.1 Hz), 67.5 (t, *J* = 22.1 Hz), 53.7, 35.4;

**<sup>19</sup>F NMR** (565 MHz, CDCl<sub>3</sub>) δ -55.43 (d, *J* = 163.9 Hz, 1 F), δ -56.65 (d, *J* = 163.9 Hz, 1 F) ppm.

**HRMS** (EI) for C<sub>12</sub>H<sub>8</sub>Cl<sub>2</sub>F<sub>2</sub>O<sub>3</sub> (M<sup>+</sup>) Calcd: 307.9813; Found: 307.9820.

**IR** (KBr): ν<sub>max</sub> = 3431, 2963, 1755, 1598, 1445, 1325, 1281, 1146, 1052, 965 cm<sup>-1</sup>.

**Methyl 5-bromo-2-(chlorodifluoromethyl)-1-oxo-2,3-dihydro-1H-indene-2-carboxylate 5g**

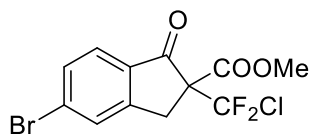

Yellow solid (160 mg, 91%), **m.p.:** 96-98 °C.

**<sup>1</sup>H NMR** (600 MHz, CDCl<sub>3</sub>) δ 7.71 (s, 1 H), 7.69 (d, *J* = 8.2 Hz, 1 H), 7.60 (d, *J* = 8.2 Hz, 1 H), 3.80 – 3.78 (m, 4 H), 3.63 (d, *J* = 17.9 Hz, 1 H);

**<sup>13</sup>C NMR** (126 MHz, CDCl<sub>3</sub>) δ 191.7, 165.3 (d, *J* = 3.5 Hz), 152.8, 133.4, 132.2, 131.9, 129.6, 126.6, 126.5 (t, *J* = 300.5 Hz), 67.4 (t, *J* = 22.1 Hz), 53.7, 35.3;

**<sup>19</sup>F NMR** (565 MHz, CDCl<sub>3</sub>) δ -55.41 (d, *J* = 167.1 Hz, 1 F), δ -56.64 (d, *J* = 166.9 Hz, 1 F) ppm.

**HRMS** (EI) for C<sub>12</sub>H<sub>8</sub>BrClF<sub>2</sub>O<sub>3</sub> (M<sup>+</sup>) Calcd: 351.9308; Found: 351.9315.

**IR** (KBr): ν<sub>max</sub> = 2963, 1755, 1594, 1437, 1323, 1221, 1053, 946, 837, 750 cm<sup>-1</sup>.

**Methyl 2-(chlorodifluoromethyl)-5-methoxy-1-oxo-2,3-dihydro-1H-indene-2-carboxylate 5h**

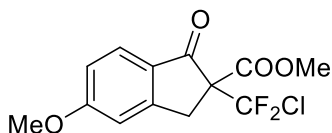

Yellow oil (123 mg, 81%).

$^1\text{H NMR}$  (600 MHz,  $\text{CDCl}_3$ )  $\delta$  7.42 (d,  $J = 8.4$  Hz, 1 H), 7.28 (dd,  $J = 8.4, 2.5$  Hz, 1 H), 7.24 (d,  $J = 2.4$  Hz, 1 H), 3.85 (s, 3 H), 3.78 (s, 3 H), 3.71 (d,  $J = 17.5$  Hz, 1 H), 3.58 (d,  $J = 17.5$  Hz, 1 H);

$^{13}\text{C NMR}$  (126 MHz,  $\text{CDCl}_3$ )  $\delta$  192.8, 165.7, 160.0, 144.4, 135.8, 126.9, 126.7 (t,  $J = 299.9$  Hz), 125.8, 106.2, 67.9 (t,  $J = 22.4$  Hz), 55.6, 53.5, 35.1;

$^{19}\text{F NMR}$  (565 MHz,  $\text{CDCl}_3$ )  $\delta$  -55.23 (d,  $J = 166.6$  Hz, 1 F),  $\delta$  -56.61 (d,  $J = 166.6$  Hz, 1 F) ppm.

**HRMS** (EI) for  $\text{C}_{13}\text{H}_{11}\text{ClF}_2\text{O}_4$  ( $\text{M}^+$ ) Calcd: 304.0308; Found: 304.0314.

**IR** (KBr):  $\nu_{\text{max}} = 3010, 2958, 1759, 1618, 1496, 1435, 1281, 1166, 1055, 971$   $\text{cm}^{-1}$ .

**Methyl 2-(chlorodifluoromethyl)-1-oxo-5-(trifluoromethyl)-2,3-dihydro-1H-indene-2-carboxylate 5i**

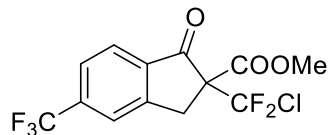

Yellow oil (135 mg, 79%).

$^1\text{H NMR}$  (600 MHz,  $\text{CDCl}_3$ )  $\delta$  8.08 (s, 1 H), 7.93 (d,  $J = 8.1$  Hz, 1 H), 7.70 (d,  $J = 8.1$  Hz, 1 H), 3.88 (d,  $J = 18.2$  Hz, 1 H), 3.78 (s, 3 H), 3.72 (d,  $J = 18.2$  Hz, 1 H);

$^{13}\text{C NMR}$  (126 MHz,  $\text{CDCl}_3$ )  $\delta$  191.82, 165.11, 154.51, 135.02, 132.67 (q,  $J = 3.4$  Hz), 131.42 (q,  $J = 33.4$  Hz), 127.21, 126.46 (t,  $J = 300.0$  Hz), 123.36 (q,  $J = 272.6$  Hz), 122.76 (q,  $J = 3.9$  Hz), 67.64 (t,  $J = 21.4$  Hz), 53.80, 35.83;

$^{19}\text{F NMR}$  (565 MHz,  $\text{CDCl}_3$ )  $\delta$  -55.53 (d,  $J = 167.5$  Hz, 1 F),  $\delta$  -56.70 (d,  $J = 167.2$  Hz, 1 F), -62.74 (s, 3 F) ppm.

**HRMS** (EI) for  $\text{C}_{13}\text{H}_8\text{ClF}_5\text{O}_3$  ( $\text{M}^+$ ) Calcd: 342.0077; Found: 342.0073.

**IR** (KBr):  $\nu_{\text{max}} = 2961, 1763, 1627, 1438, 1332, 1256, 1171, 1131, 1058, 972$   $\text{cm}^{-1}$ .

**Ethyl 2-(chlorodifluoromethyl)-1-oxo-2,3-dihydro-1H-indene-2-carboxylate 5j**

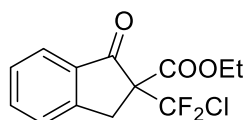

Yellow oil (138 mg, 96%).

$^1\text{H NMR}$  (600 MHz,  $\text{CDCl}_3$ )  $\delta$  7.81 (d,  $J = 6.0$  Hz, 1 H), 7.67 (t,  $J = 9.0$  Hz, 1 H), 7.52 (d,  $J = 12.0$  Hz, 1 H), 7.43 (t,  $J = 6.0$  Hz, 1 H), 4.27 – 4.17 (m, 2 H), 3.80 (d,  $J = 18.0$  Hz, 1 H), 3.64 (d,  $J = 18.0$  Hz, 1 H), 1.21 (t,  $J = 6.0$  Hz, 3 H);

$^{13}\text{C NMR}$  (126 MHz,  $\text{CDCl}_3$ )  $\delta$  193.0, 165.1, 151.4, 136.1, 134.5, 128.3, 126.8 (t,  $J = 300.0$  Hz), 126.2, 125.4, 67.4 (t,  $J = 22.1$  Hz), 62.7, 35.7, 13.7;

$^{19}\text{F NMR}$  (565 MHz,  $\text{CDCl}_3$ )  $\delta$  -55.17 (d,  $J = 163.9$  Hz, 1 F),  $\delta$  -56.31 (d,  $J = 169.5$  Hz, 1 F) ppm.

**HRMS** (EI) for  $\text{C}_{13}\text{H}_{11}\text{ClF}_2\text{O}_3$  ( $\text{M}^+$ ) Calcd: 288.0359; Found: 288.0355.

**IR** (KBr):  $\nu_{\text{max}} = 2985, 1756, 1608, 1466, 1276, 1215, 1049, 937, 887, \text{cm}^{-1}$ .

**(3s,5s,7s)-Adamantan-1-yl 2-(chlorodifluoromethyl)-6-methyl-1-oxo-2,3-dihydro-1H-indene-2-carboxylate 5k**

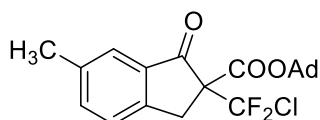

Yellow oil (114 mg, 56%)

$^1\text{H NMR}$  (600 MHz,  $\text{CDCl}_3$ )  $\delta$  7.61 (s, 1 H), 7.47 (d,  $J = 7.8$  Hz, 1 H), 7.39 (d,  $J = 8.0$  Hz, 1 H), 3.68 (d,  $J = 17.6$  Hz, 1 H), 3.55 (d,  $J = 17.6$  Hz, 1 H), 2.41 (s, 3 H), 2.15 – 2.12 (m, 3 H), 2.05 (d,  $J = 3.0$  Hz, 6 H), 1.61 (q,  $J = 4.8, 3.9$  Hz, 6 H);

$^{13}\text{C NMR}$  (126 MHz,  $\text{CDCl}_3$ )  $\delta$  193.5, 163.8, 148.9, 138.4, 137.2, 135.1, 127.0 (t,  $J = 300.5$  Hz), 125.8, 125.2, 84.21, 68.5 (t,  $J = 20.8$  Hz), 40.8, 35.9, 35.6, 30.8, 21.0;

$^{19}\text{F NMR}$  (470 MHz,  $\text{CDCl}_3$ )  $\delta$  -55.07 (d,  $J = 166.1$  Hz, 1 F),  $\delta$  -56.95 (d,  $J = 165.9$  Hz, 1 F) ppm.

**HRMS** (EI) for  $\text{C}_{22}\text{H}_{23}\text{ClF}_2\text{O}_3$  ( $\text{M}^+$ ) Calcd: 408.1298; Found: 408.1300.

**IR** (KBr):  $\nu_{\text{max}} = 3431, 2913, 1724, 1618, 1496, 1258, 1104, 1049, 933 \text{cm}^{-1}$ .

**2,2-Dimethyl-3,4-dihydronaphthalen-1(2H)-one 5l**

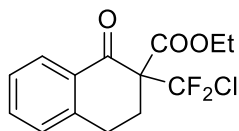

Yellow oil (75 mg, 50%).

**<sup>1</sup>H NMR** (600 MHz, CDCl<sub>3</sub>) δ 8.11 (d, *J* = 6.0 Hz, 1 H), 7.51 (t, *J* = 9.0 Hz, 1 H), 7.35 (t, *J* = 9.0 Hz, 1 H), 7.24 (d, *J* = 6.0 Hz, 1 H), 4.26 – 4.20 (m, 2 H), 3.03 (s, 2 H), 2.89 (d, *J* = 18.0 Hz, 1 H), 2.57 – 2.50 (m, 1 H), 1.19 – 1.15 (m, 3 H);

**<sup>13</sup>C NMR** (126 MHz, CDCl<sub>3</sub>) δ 187.6, 165.2, 141.9, 134.1, 131.7, 128.6, 128.4, 127.5 (t, *J* = 300.7 Hz), 127.2, 66.0 (t, *J* = 20.2 Hz), 62.9, 28.7, 25.3, 13.8;

**<sup>19</sup>F NMR** (565 MHz, CDCl<sub>3</sub>) δ -53.59 (d, *J* = 169.5 Hz, 1 F), δ -55.30 (d, *J* = 169.5 Hz, 1 F) ppm.

**HRMS** (FI) for C<sub>14</sub>H<sub>13</sub>O<sub>3</sub>ClF<sub>2</sub> (M<sup>+</sup>) Calcd: 302.0516; Found: 302.0522.

**IR** (KBr):  $\nu_{\max}$  = 2984, 1740, 1602, 1456, 1305, 1207, 1105, 1002, 960 cm<sup>-1</sup>.

## Electroanalysis

Alumina powders, polishing pads, glassy carbon working electrodes, and silver wire reference electrodes were procured from CH Instruments Inc., and platinum counter electrodes were purchased from Gaoss Union. Cyclic voltammetric experiments were recorded on a CHI610E workstation at room temperature within a nitrogen-filled glovebox. The reference electrode was composed of a silver wire electrode and AgNO<sub>3</sub> solution in acetonitrile. It was calibrated using 2 mmol/L of Fc<sup>+</sup>/Fc before conducting cyclic voltammetric tests.

Test data were analyzed and graphed using OriginPro learning edition. Anodic peak potentials ( $E_{pa}$ ) and cathodic peak potentials ( $E_{pc}$ ) were both identified and marked on the plots. For the quasi-reversible Fc<sup>+</sup>/Fc redox couple, the estimation of the reduction potential ( $E_{red}$ ) was based on the calculation of the half-wave potential ( $E_{1/2}$ ), which are averages between the  $E_{pa}$  and the  $E_{pc}$ . For the irreversible **YlideFluor-CF<sub>2</sub>Cl**/[**YlideFluor-CF<sub>2</sub>Cl**]<sup>-</sup> redox couple, the inflection-point potential ( $E_i$ ) was employed to estimate the  $E_{red}$ , defined as the potentials where the second derivative of the current with respect to the potential is zero while the first derivative is not ( $\partial^2 i / \partial E^2 = 0$  and  $\partial i / \partial E \neq 0$ )

**Reference:** E. M. Espinoza, J. A. Clark, J. Soliman, J. B. Derr, M. Morales and V. I. Vullev, *J. Electrochem. Soc.* **2019**, *166*, H3175..

Building on our prior studies, we postulated that the first cathodic peak corresponds to the reduction of **YlideFluor-CF<sub>2</sub>Cl** to [**YlideFluor-CF<sub>2</sub>Cl**]<sup>-</sup>, and the second cathodic peak signifies the reduction of CF<sub>2</sub>Cl<sup>•</sup> to CF<sub>2</sub>Cl<sup>-</sup>. Additionally, the third cathodic peak along with the neighboring anodic peak is associated with the redox process of the nitro group within [4-NO<sub>2</sub>-C<sub>6</sub>H<sub>4</sub>-S-C(CO<sub>2</sub>Me)<sub>2</sub>]<sup>-</sup>.



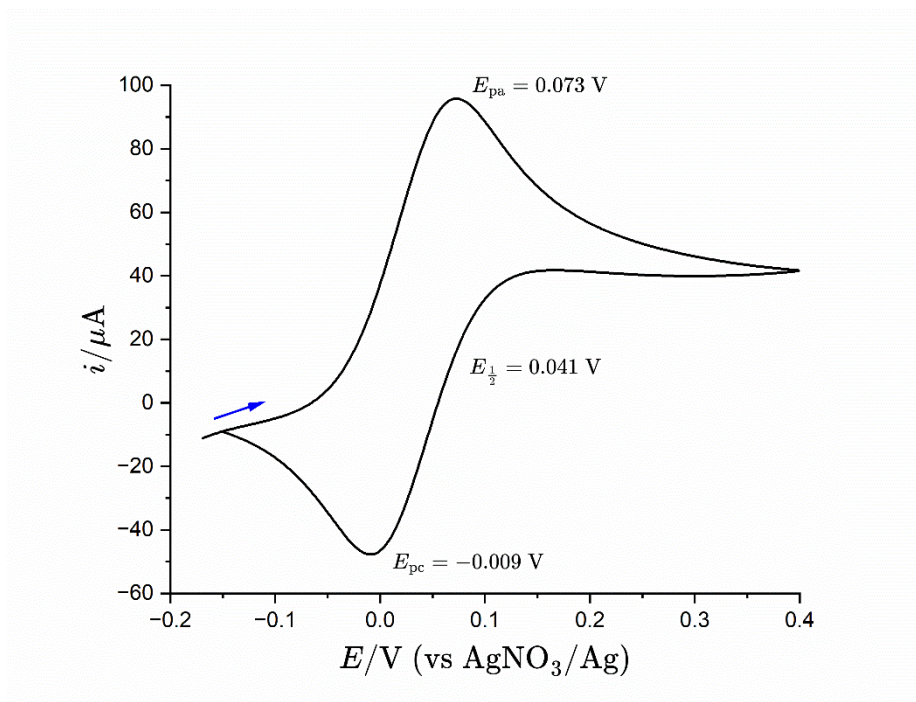

**Figure S1.** Calibration of the  $\text{AgNO}_3/\text{Ag}$  reference electrode. The scan rate was 20 mV/s. Ferrocene (2 mmol/L),  $\text{TBAPF}_6$  (100 mmol/L), and acetonitrile (10 mL). The solution resistance of  $53.6 \Omega$  was fully compensated.

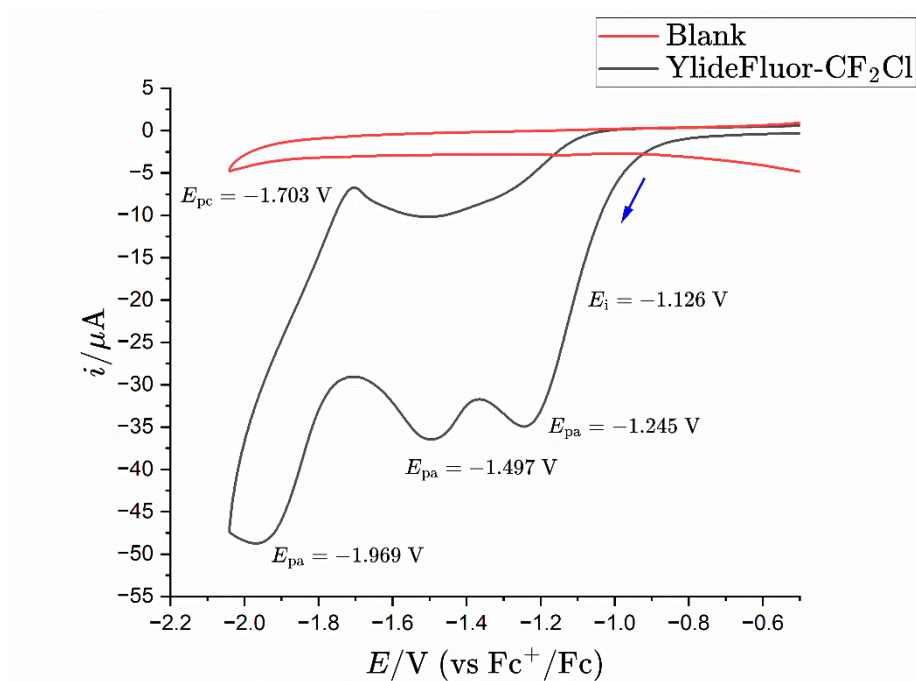

**Figure S2.** Scan rates were 100 mV/s. The red curve:  $\text{TBAPF}_6$  (100 mmol/L) and acetonitrile (10 mL). The solution resistance of  $52.4 \Omega$  was fully compensated. The black curve: **YlideFluor- $\text{CF}_2\text{Cl}$**  (20 mmol/L),  $\text{TBAPF}_6$  (100 mmol/L), and acetonitrile (10 mL). The solution resistance of  $53.6 \Omega$  was fully compensated.

## UV-Vis Spectrum of YlideFluor-CF<sub>2</sub>Cl

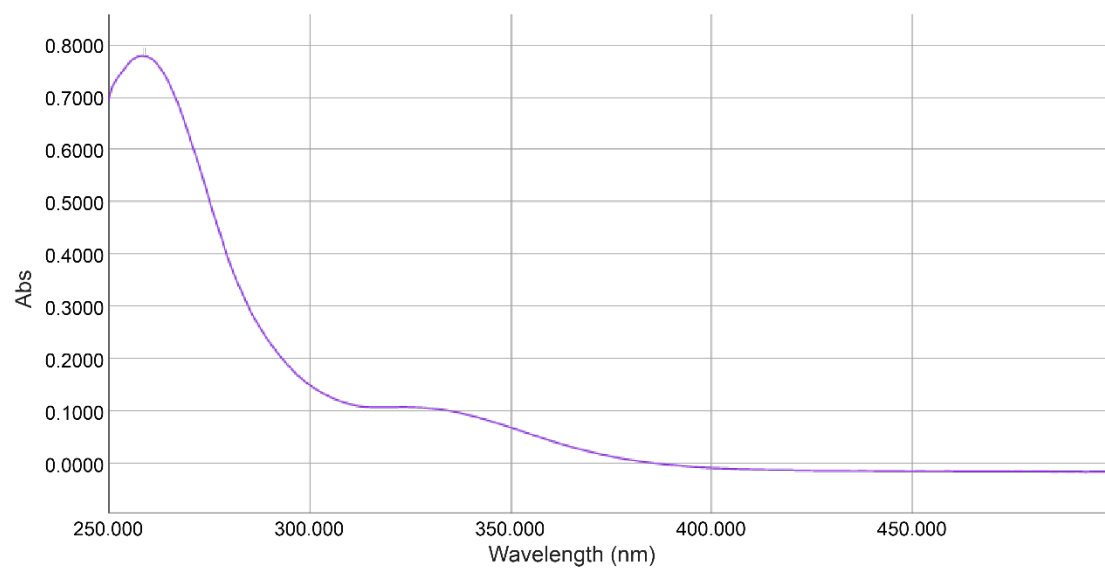

**Figure S3.** UV-Vis spectrum of YlideFluor-CF<sub>2</sub>Cl.

# $^1\text{H}$ , $^{13}\text{C}$ , and $^{19}\text{F}$ NMR Spectra

## $^1\text{H}$ NMR spectrum of YlideFluor- $\text{CF}_2\text{Cl}$

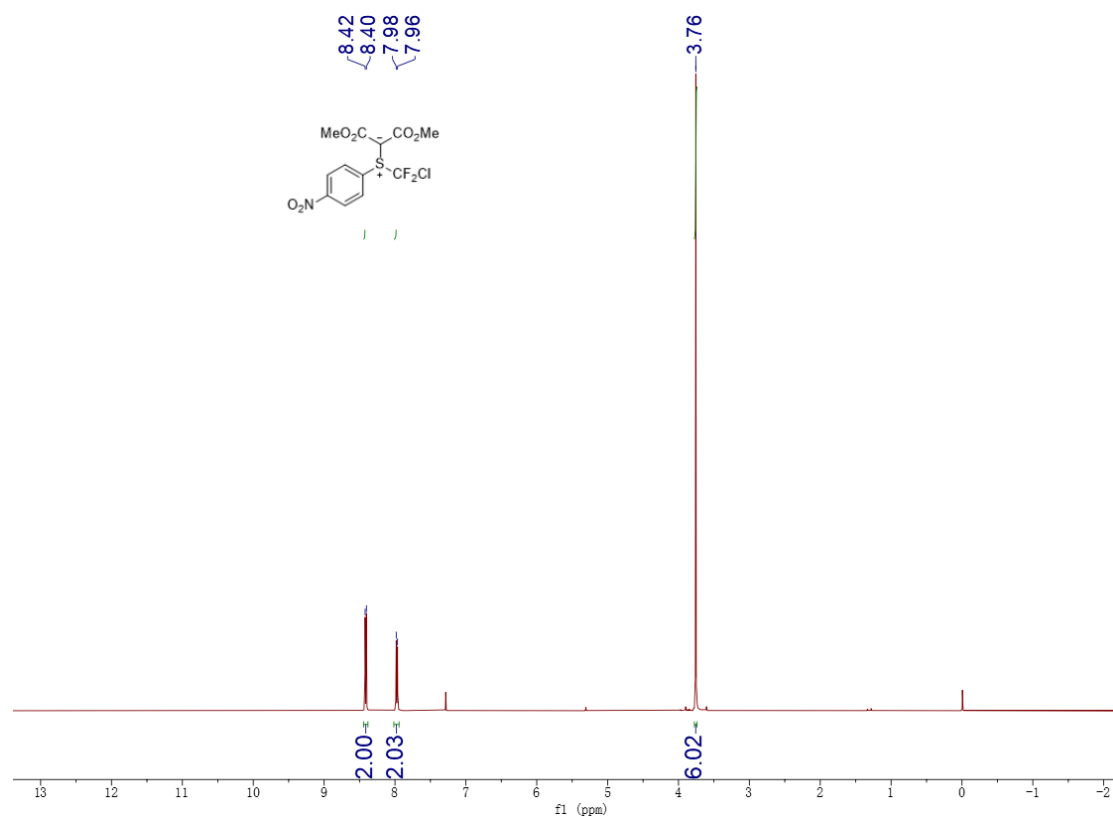

## $^{13}\text{C}$ NMR spectrum of YlideFluor- $\text{CF}_2\text{Cl}$

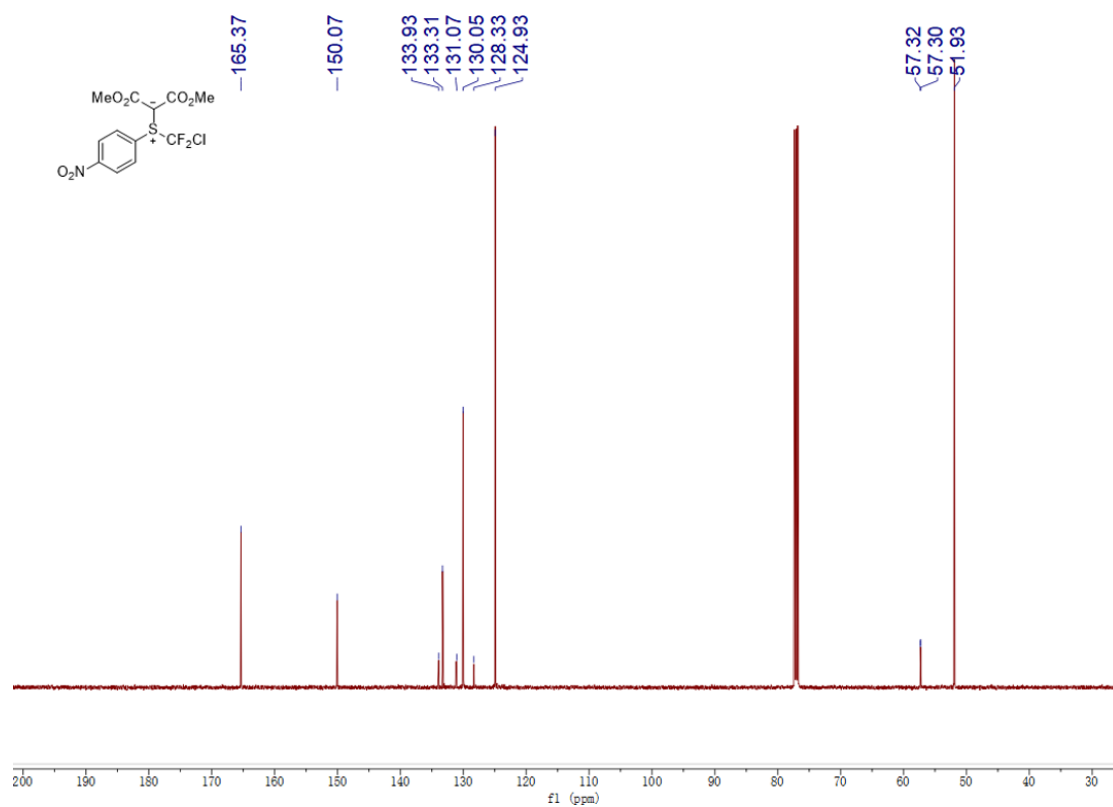

### <sup>19</sup>F NMR spectrum of YlideFluor-CF<sub>2</sub>Cl

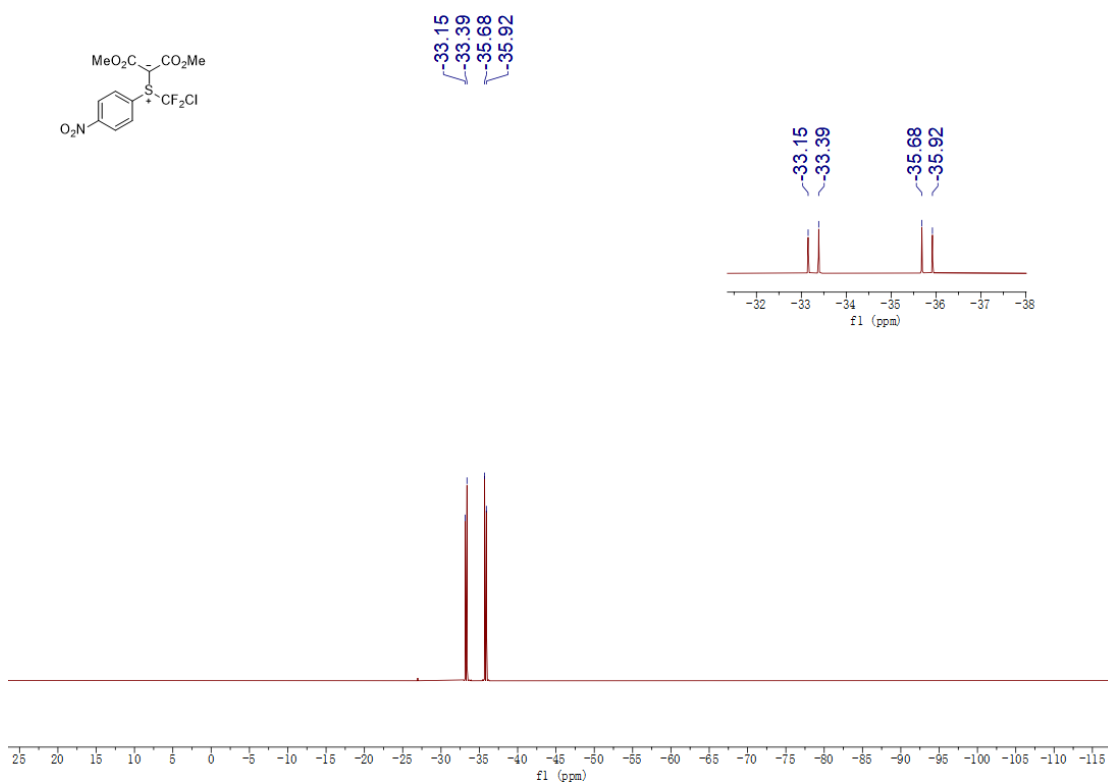

### <sup>1</sup>H NMR spectrum of 3-Chloro-3,3-difluoro-1-phenylpropan-1-one 1a

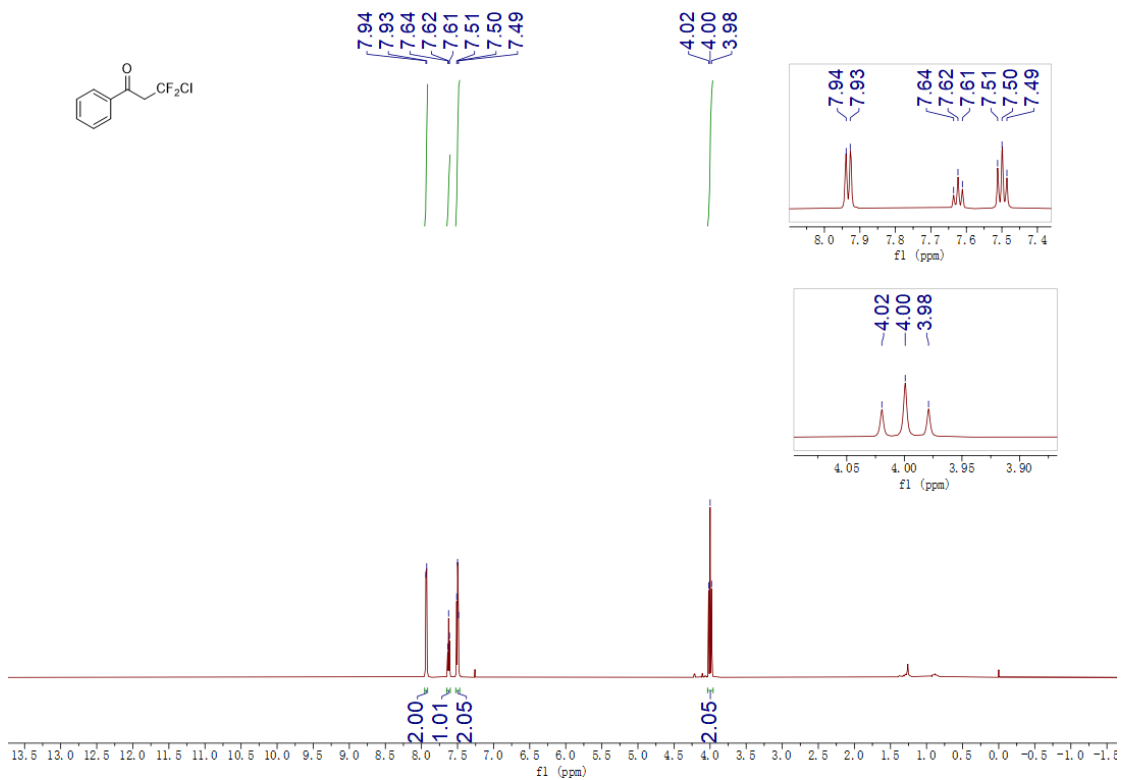

### <sup>13</sup>C NMR spectrum of 3-Chloro-3,3-difluoro-1-phenylpropan-1-one 1a

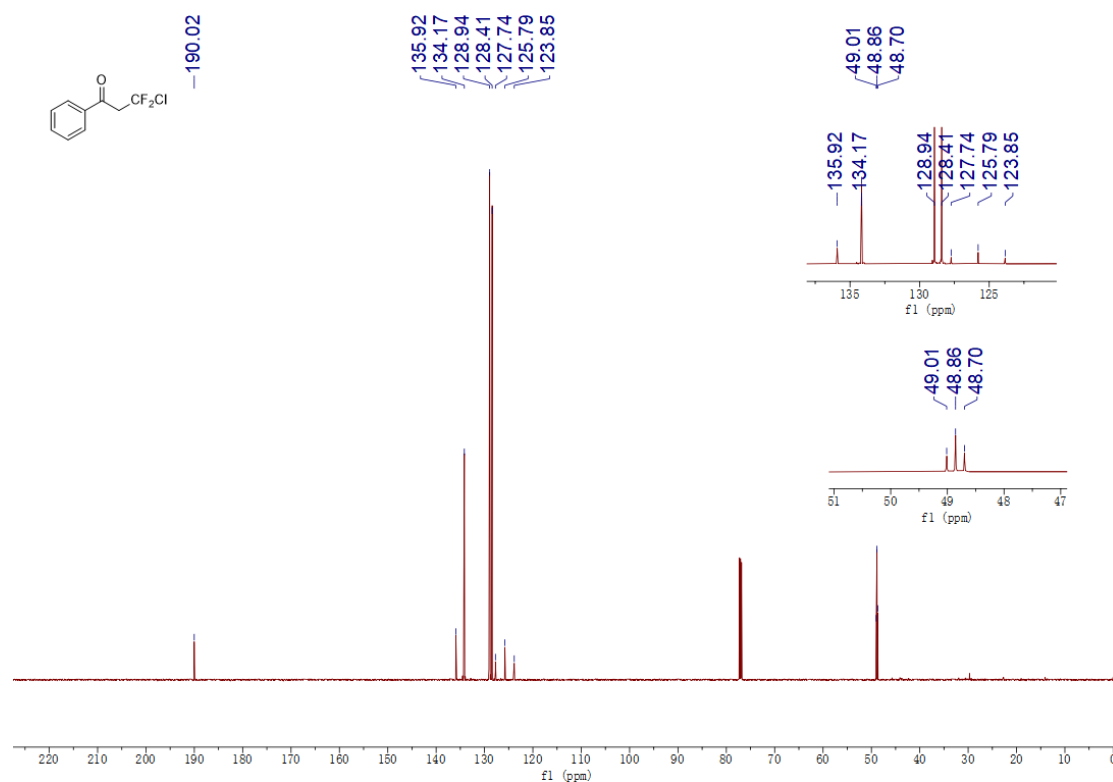

### <sup>19</sup>F NMR spectrum of 3-Chloro-3,3-difluoro-1-phenylpropan-1-one 1a

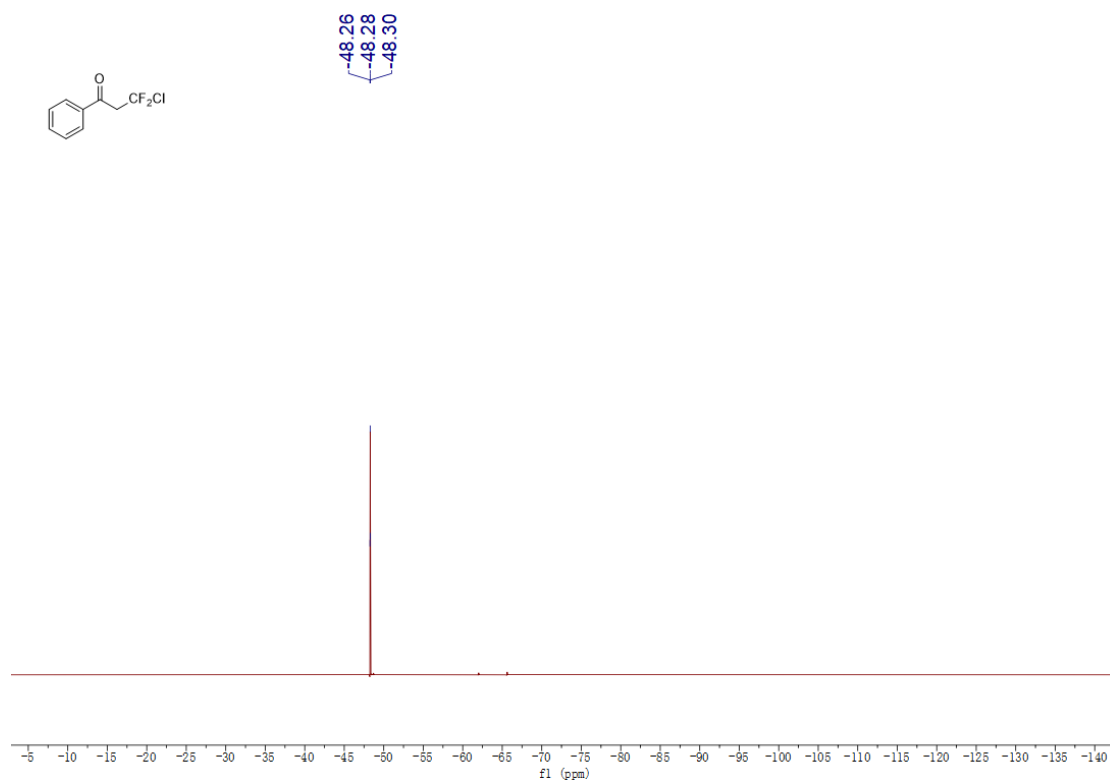

**<sup>1</sup>H NMR spectrum of 1-([1,1'-biphenyl]-4-yl)-3-chloro-3,3-difluoropropan-1-one 1b**

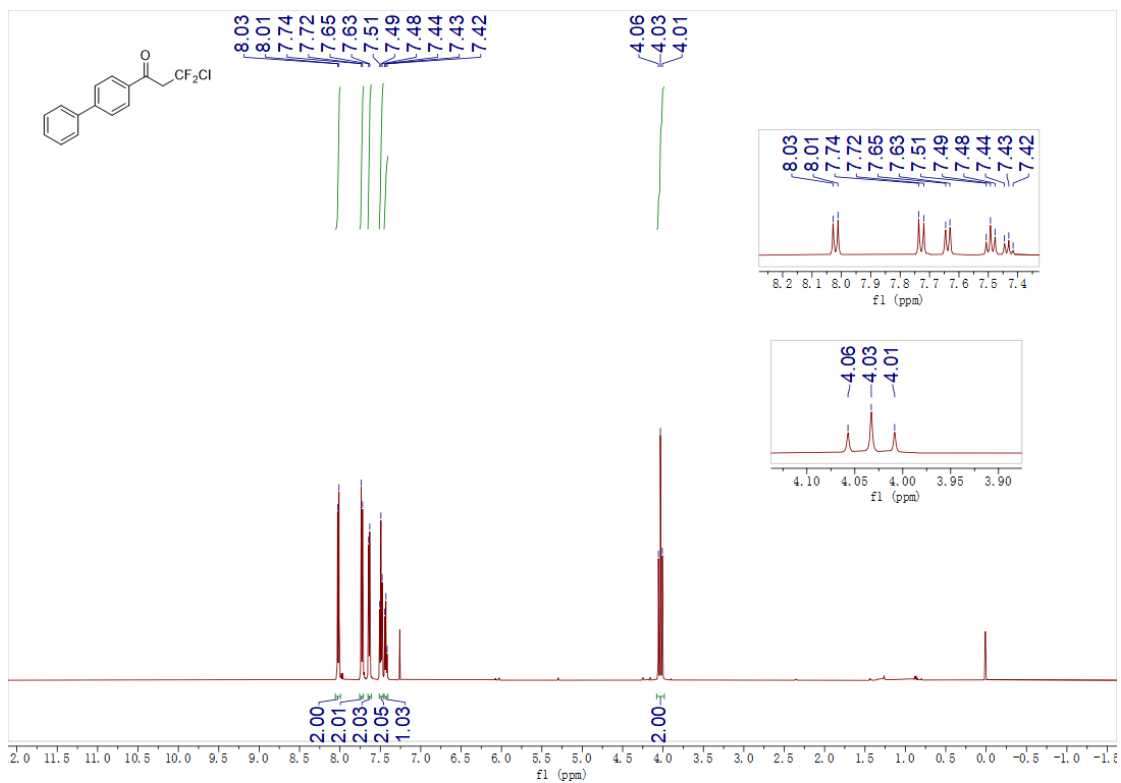

**<sup>13</sup>C NMR spectrum of 1-([1,1'-biphenyl]-4-yl)-3-chloro-3,3-difluoropropan-1-one 1b**

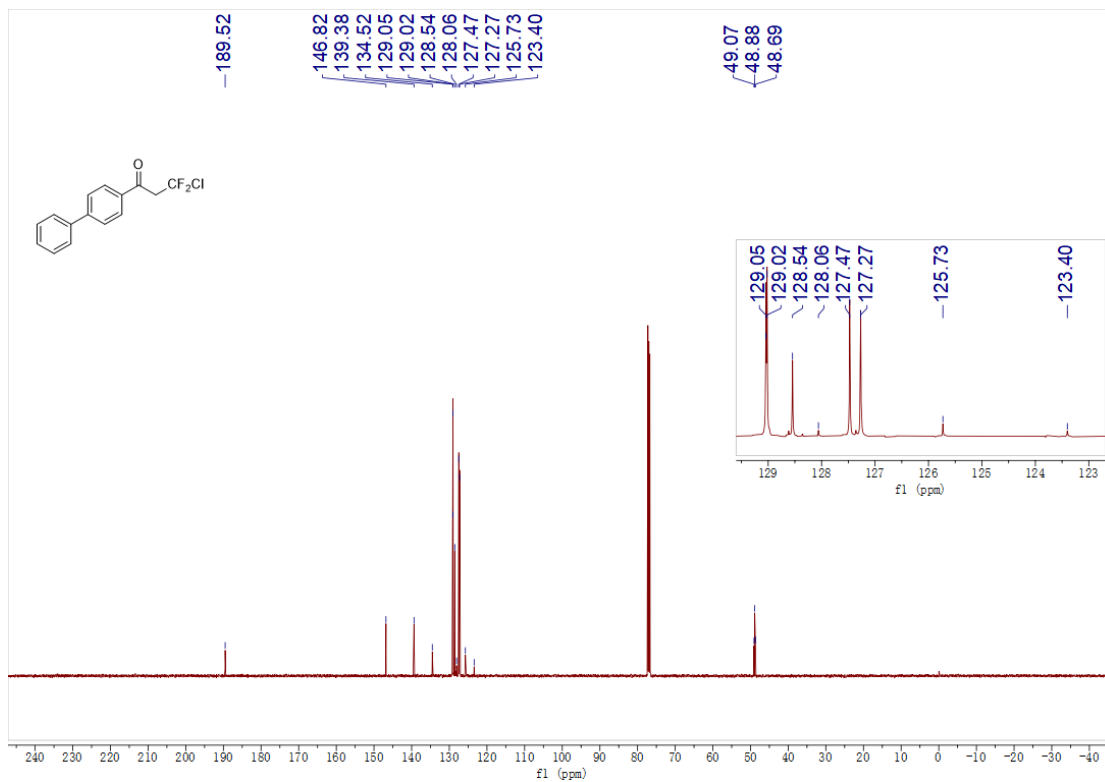

**$^{19}\text{F}$  NMR spectrum of 1-([1,1'-biphenyl]-4-yl)-3-chloro-3,3-difluoropropan-1-one 1b**

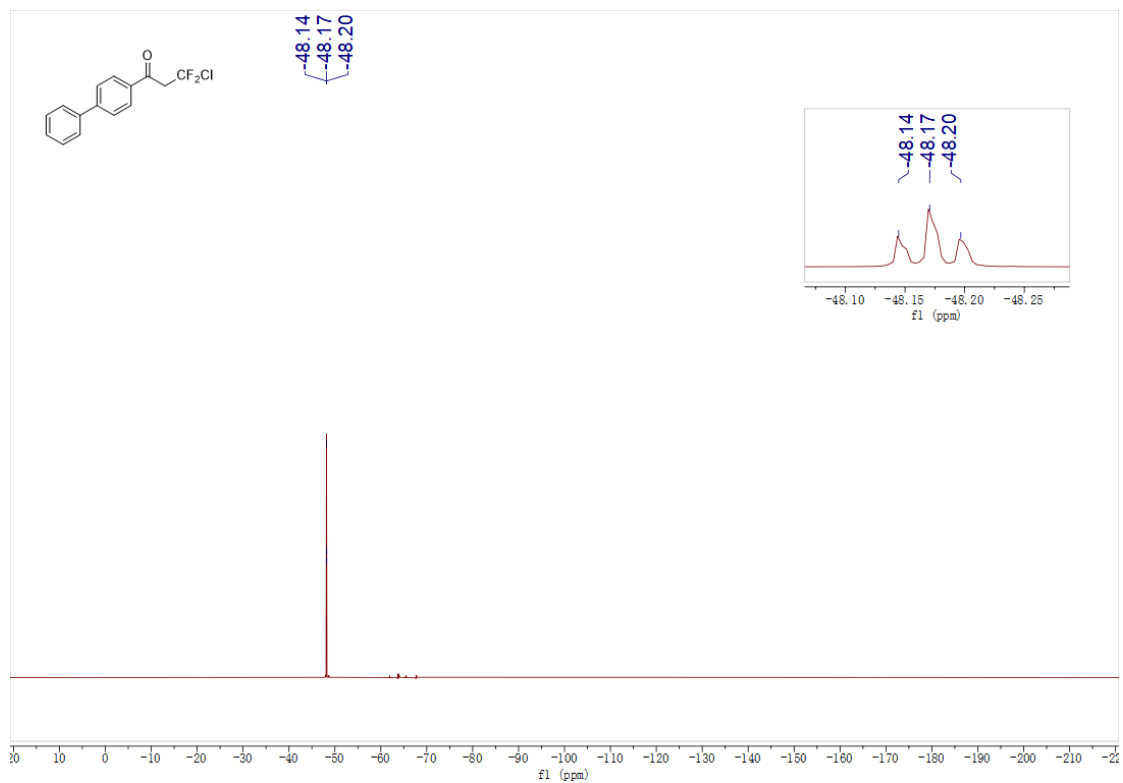

**$^1\text{H}$  NMR spectrum of 3-chloro-3,3-difluoro-1-(4-iodophenyl)propan-1-one 1c**

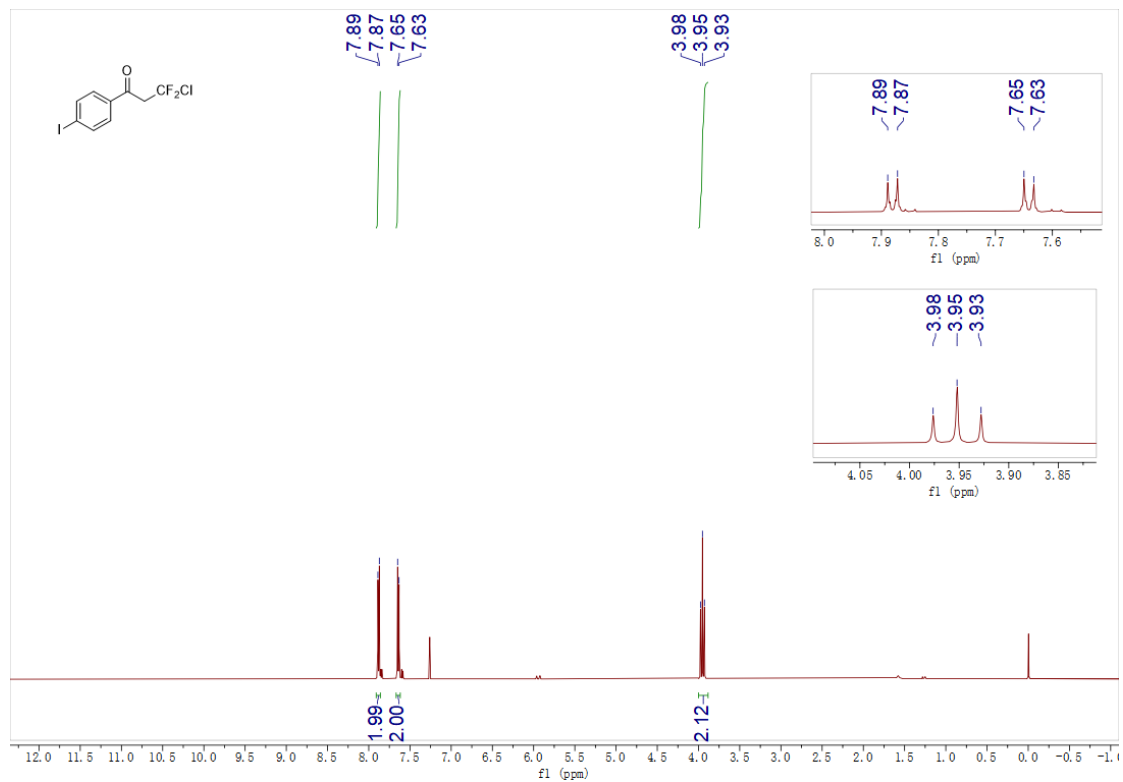

### <sup>13</sup>C NMR spectrum of 3-chloro-3,3-difluoro-1-(4-iodophenyl)propan-1-one 1c

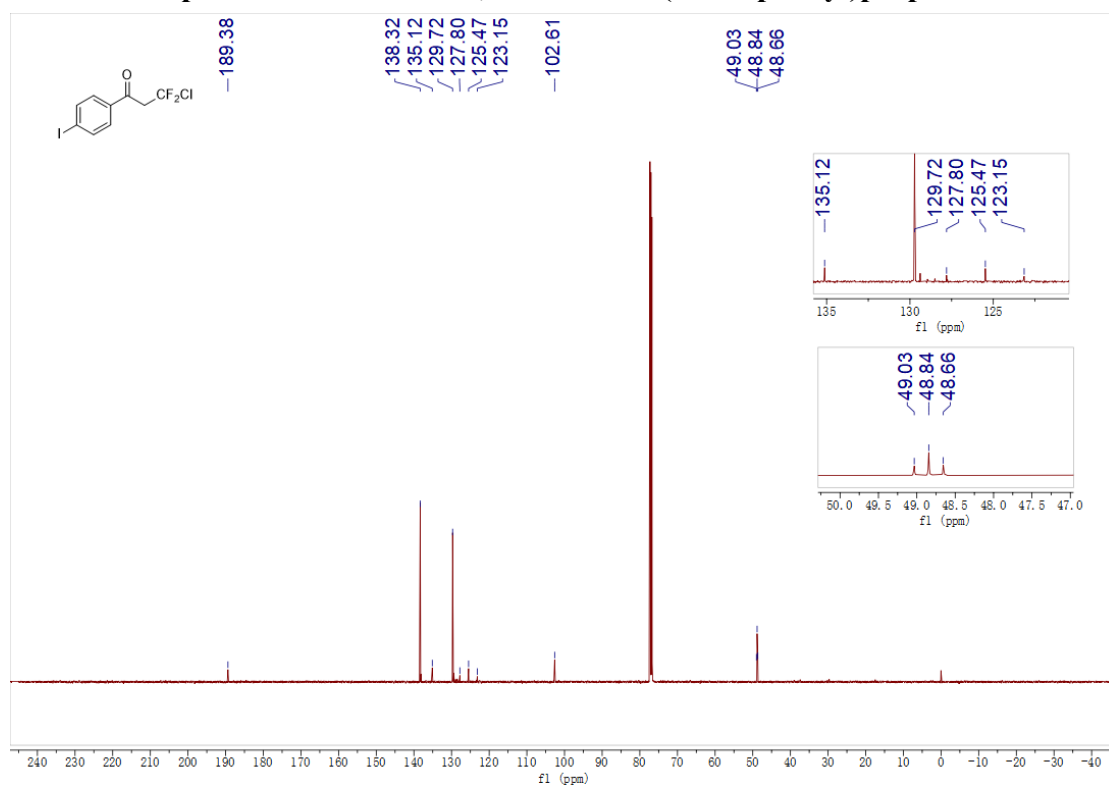

### <sup>19</sup>F NMR spectrum of 3-chloro-3,3-difluoro-1-(4-iodophenyl)propan-1-one 1c

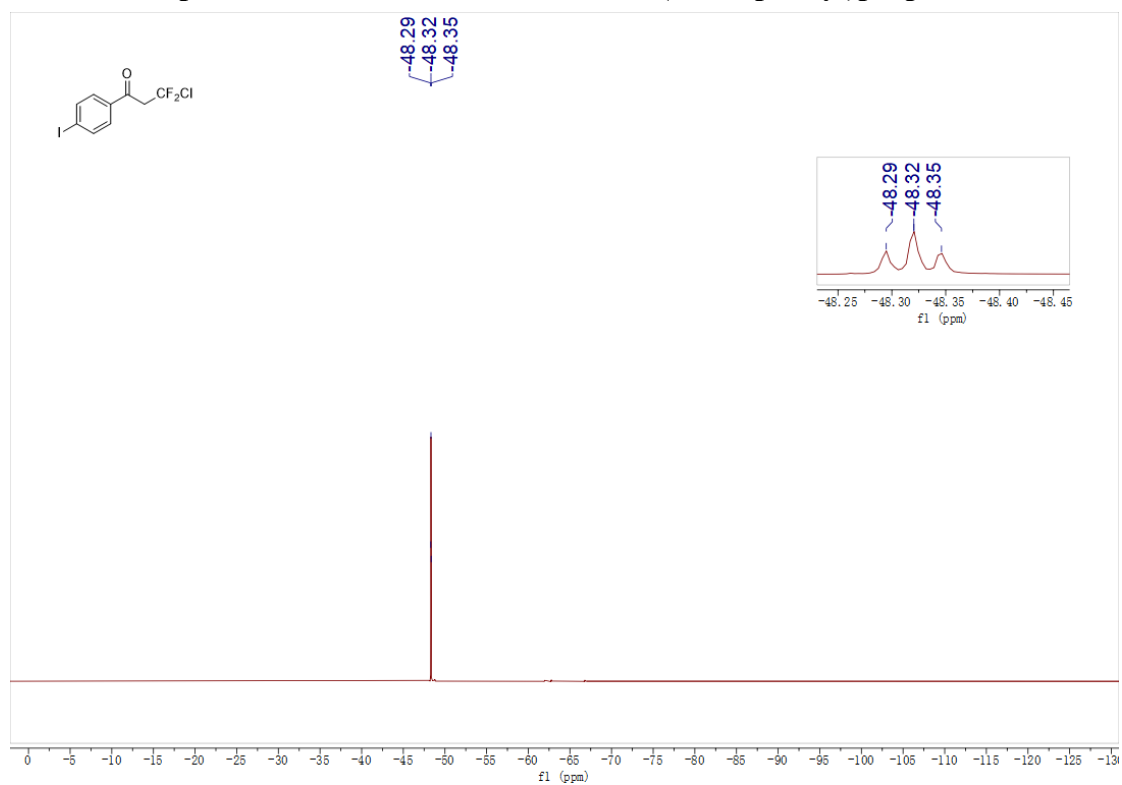



### <sup>1</sup>H NMR spectrum of 1-(4-bromophenyl)-3-chloro-3,3-difluoropropan-1-one 1d

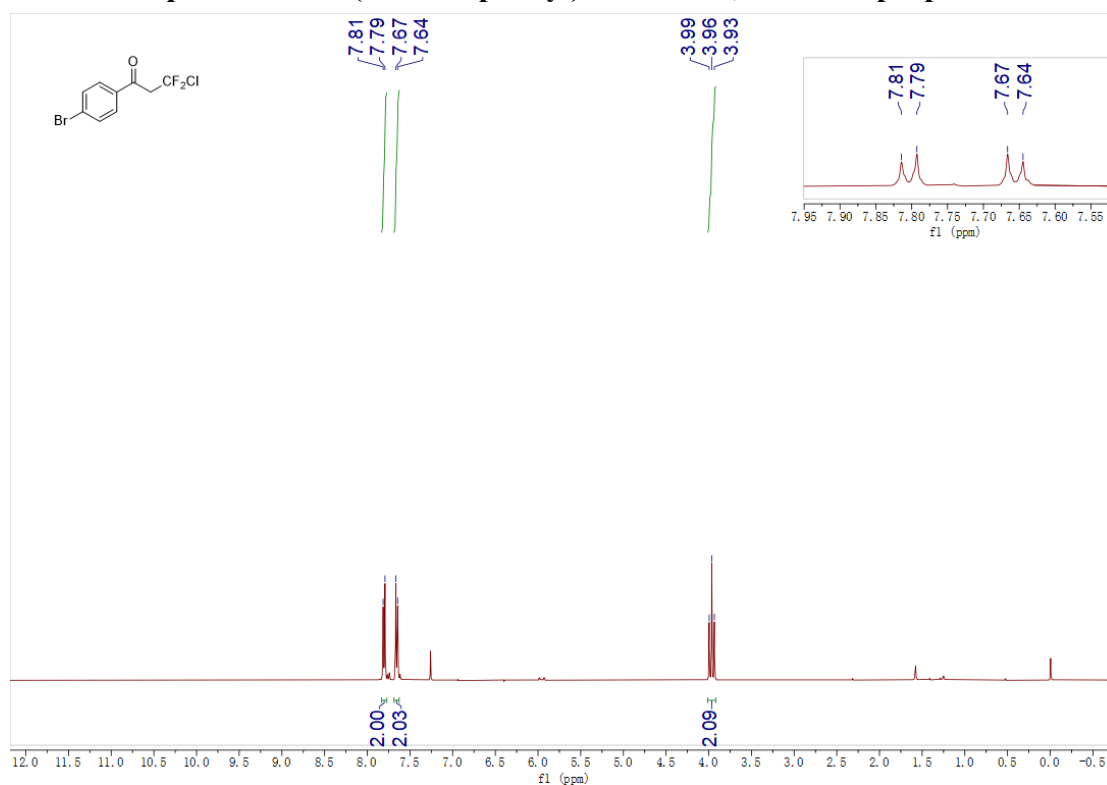

### <sup>13</sup>C NMR spectrum of 1-(4-bromophenyl)-3-chloro-3,3-difluoropropan-1-one 1d

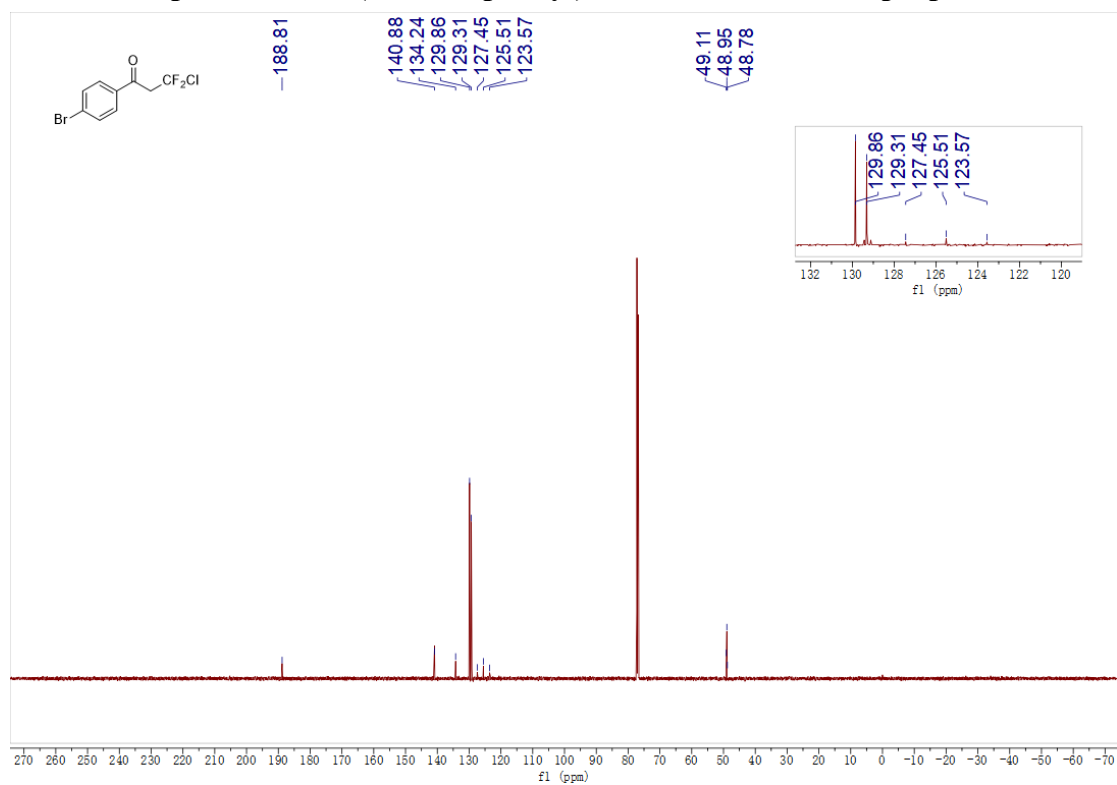

### <sup>19</sup>F NMR spectrum of 1-(4-bromophenyl)-3-chloro-3,3-difluoropropan-1-one 1d

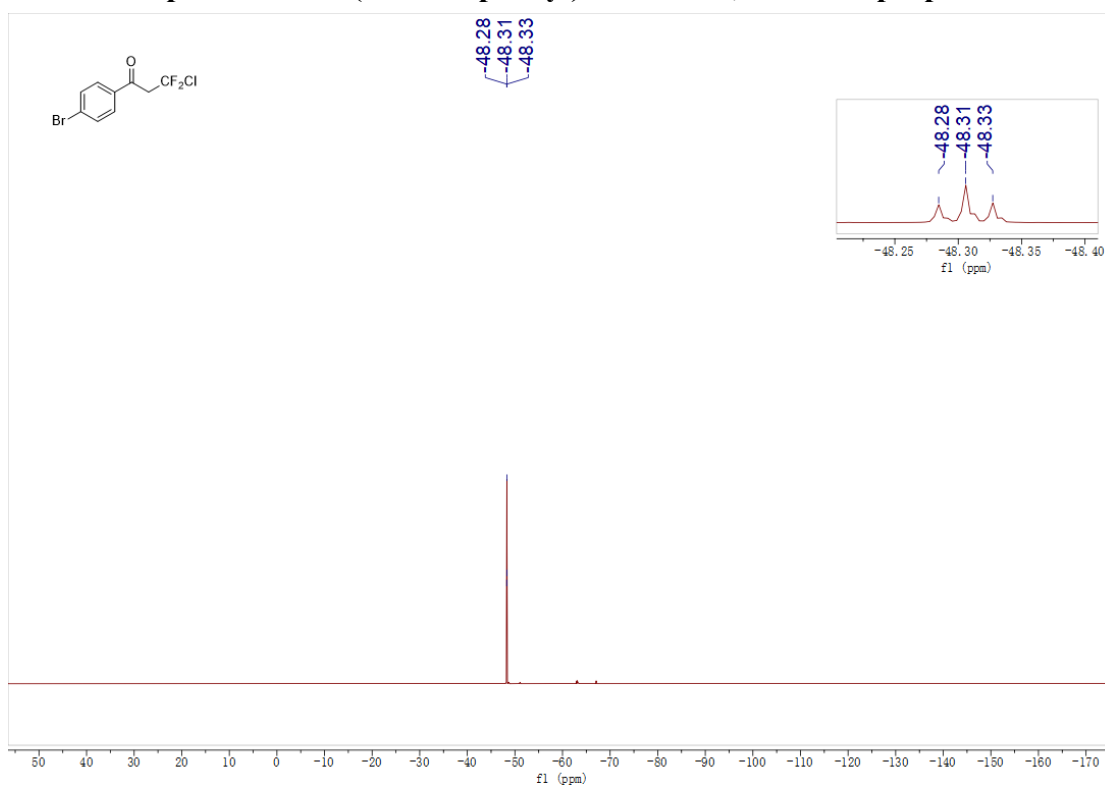

### <sup>1</sup>H NMR spectrum of 3-chloro-3,3-difluoro-1-(4-fluorophenyl)propan-1-one 1e

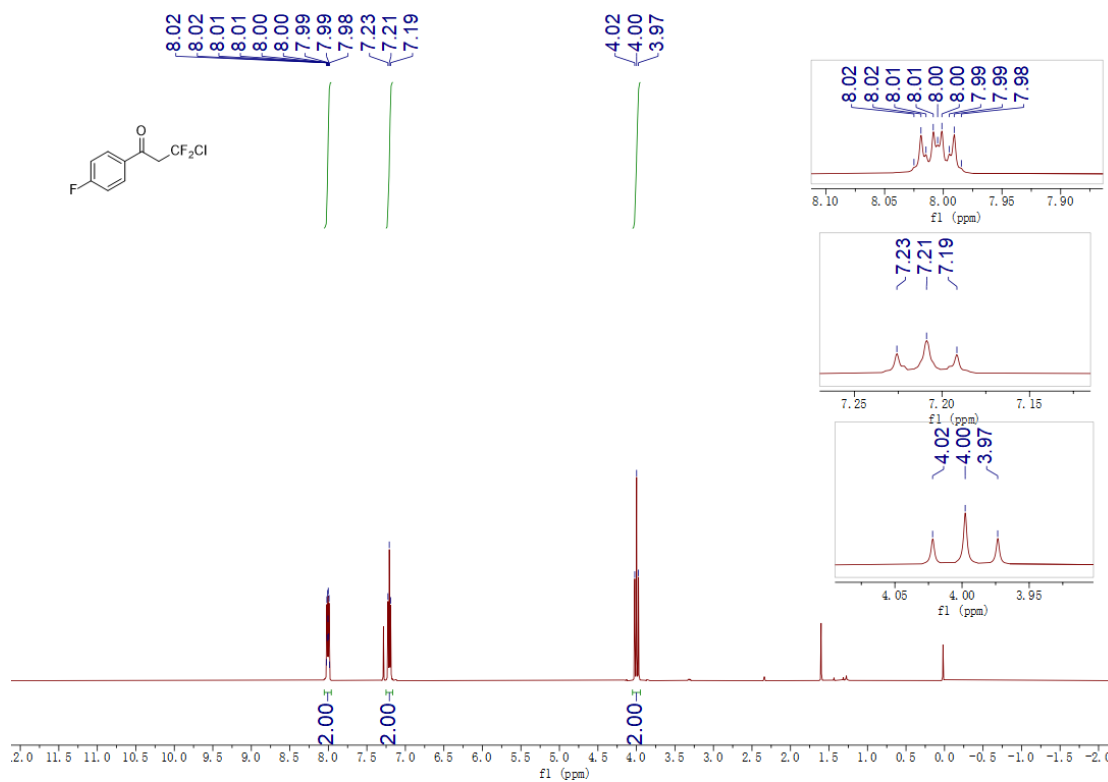

### <sup>13</sup>C NMR spectrum of 3-chloro-3,3-difluoro-1-(4-fluorophenyl)propan-1-one 1e

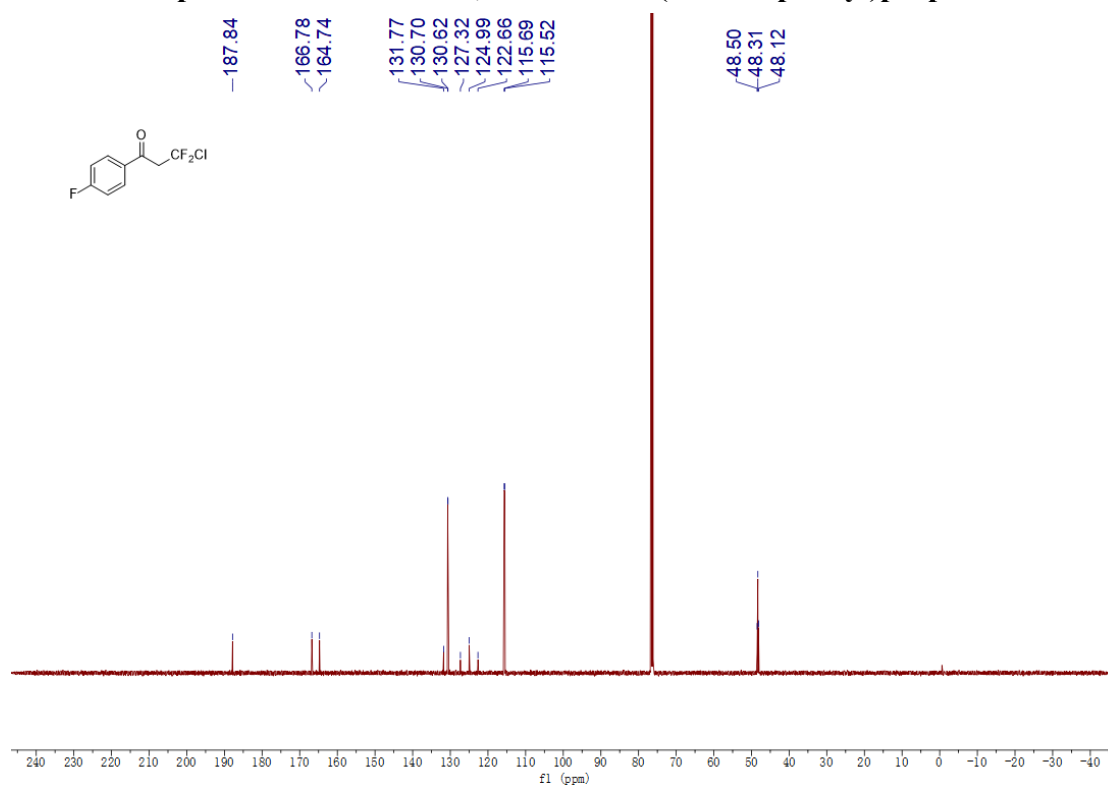

### <sup>19</sup>F NMR spectrum of 3-chloro-3,3-difluoro-1-(4-fluorophenyl)propan-1-one 1e

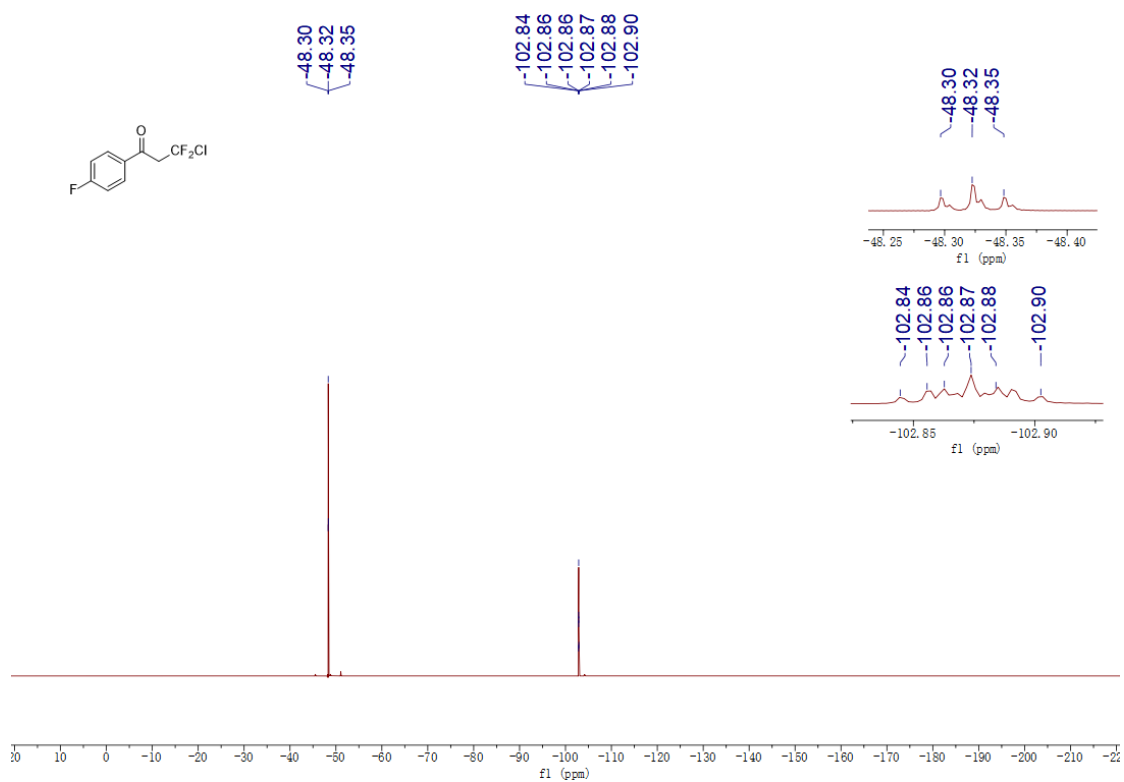

**<sup>1</sup>H NMR spectrum of 3-chloro-3,3-difluoro-1-(o-tolyl)propan-1-one 1f**

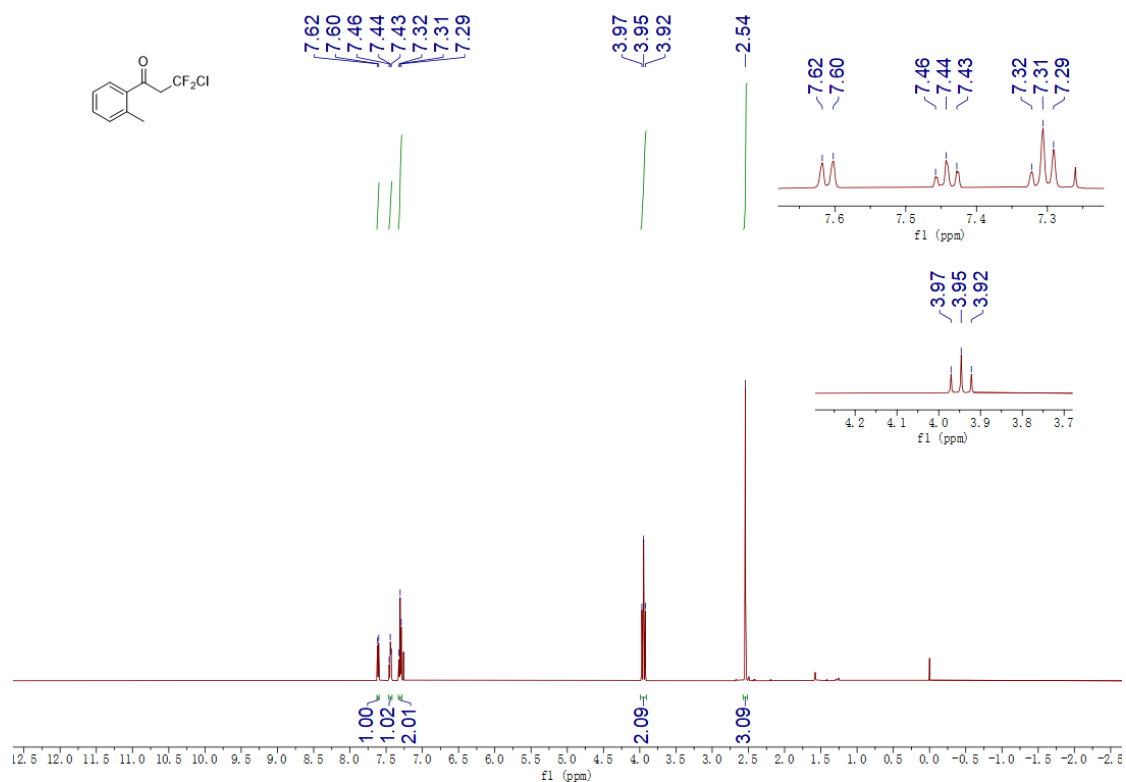

**<sup>13</sup>C NMR spectrum of 3-chloro-3,3-difluoro-1-(o-tolyl)propan-1-one 1f**

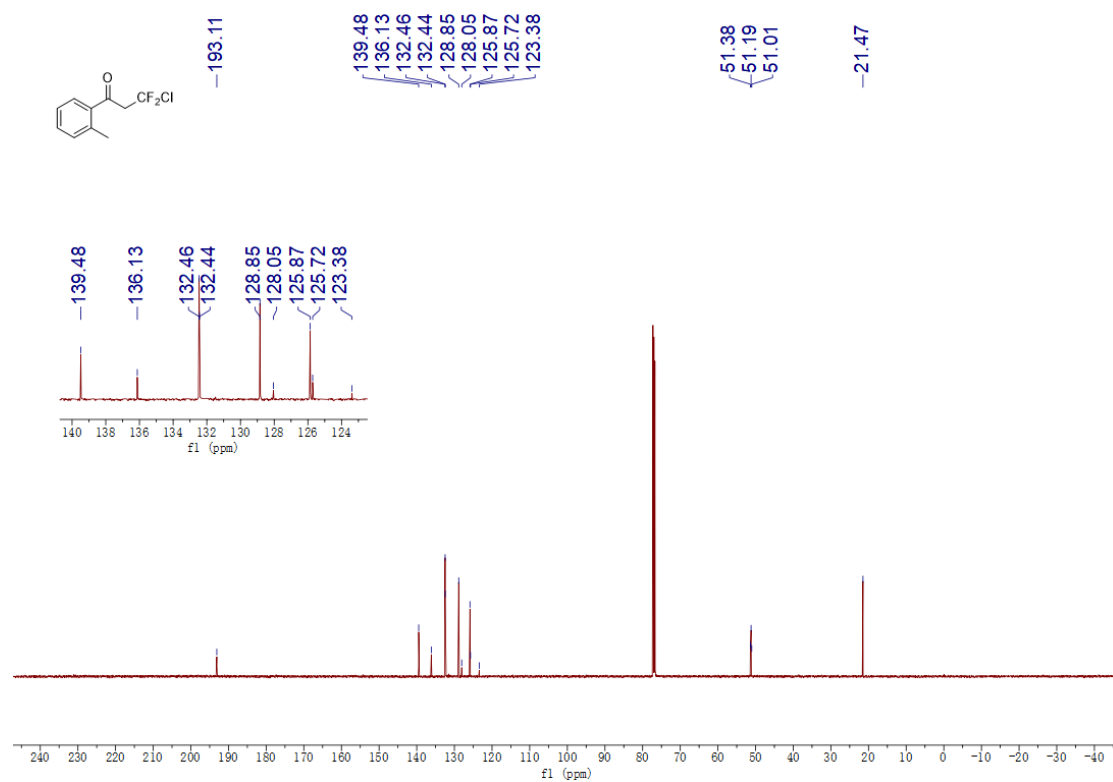

### $^{19}\text{F}$ NMR spectrum of 3-chloro-3,3-difluoro-1-(o-tolyl)propan-1-one 1f

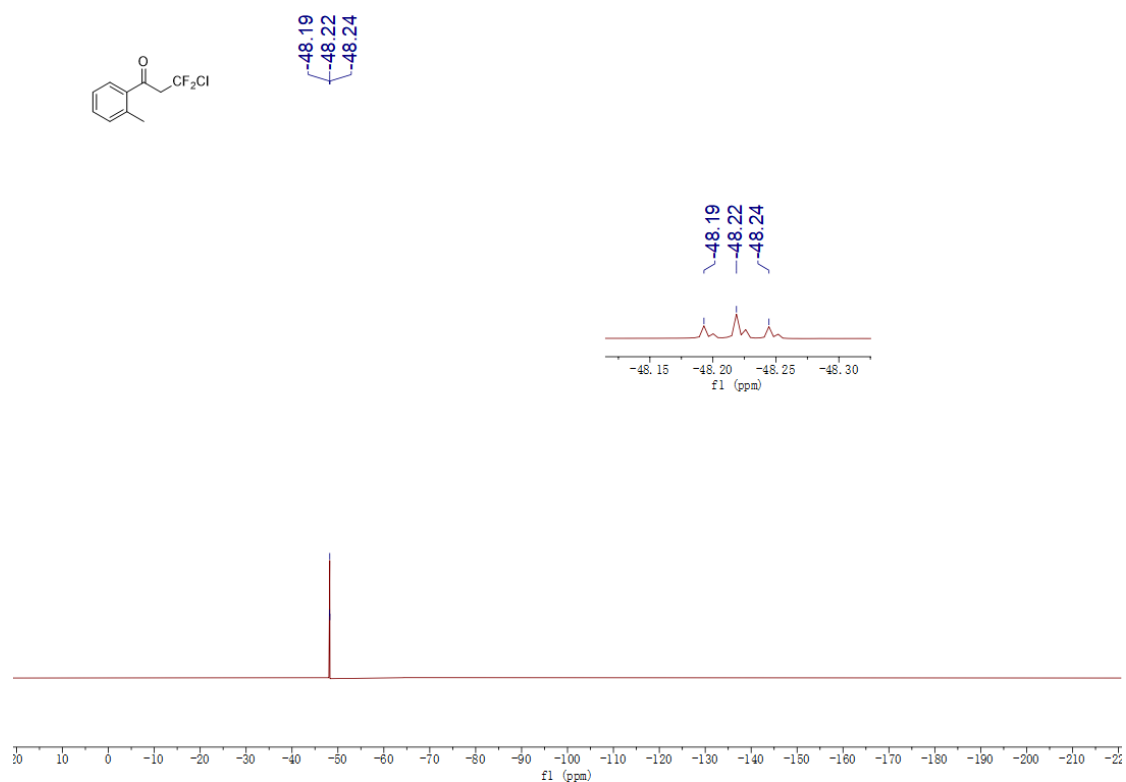

### $^1\text{H}$ NMR spectrum of 3-chloro-3,3-difluoro-1-(4-(methylthio)phenyl)propan-1-one 1g

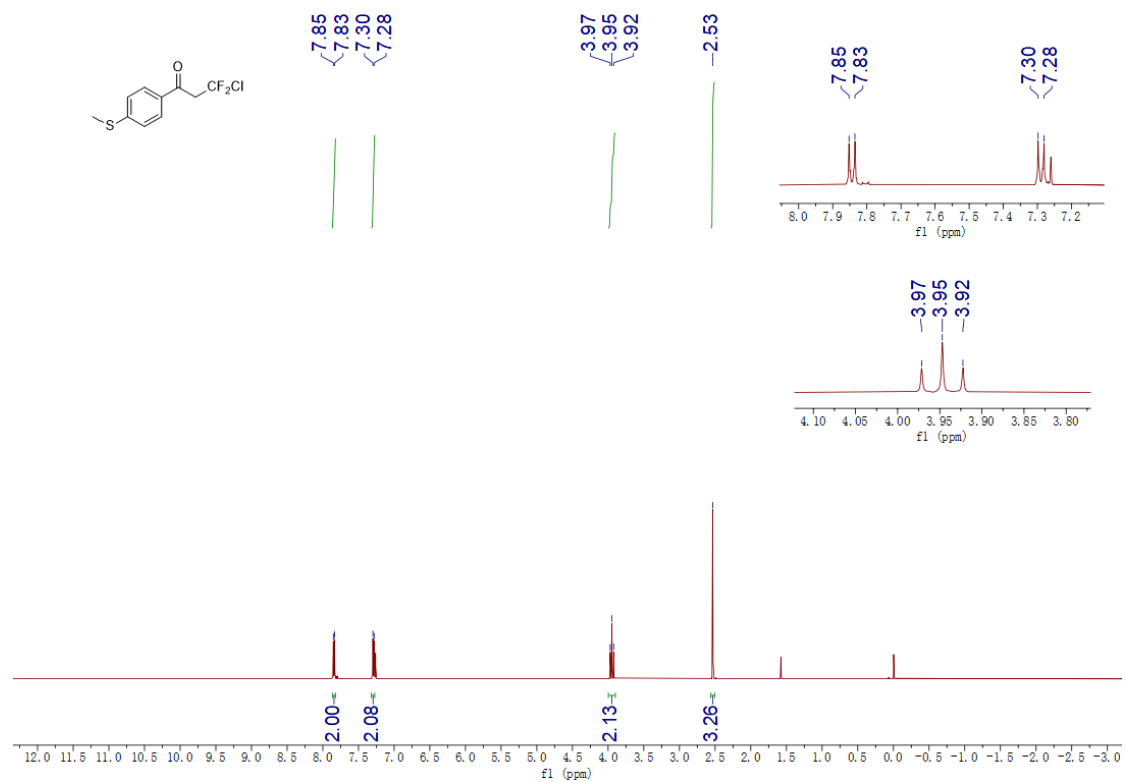

**<sup>13</sup>C NMR spectrum of 3-chloro-3,3-difluoro-1-(4-(methylthio)phenyl)propan-1-one 1g**

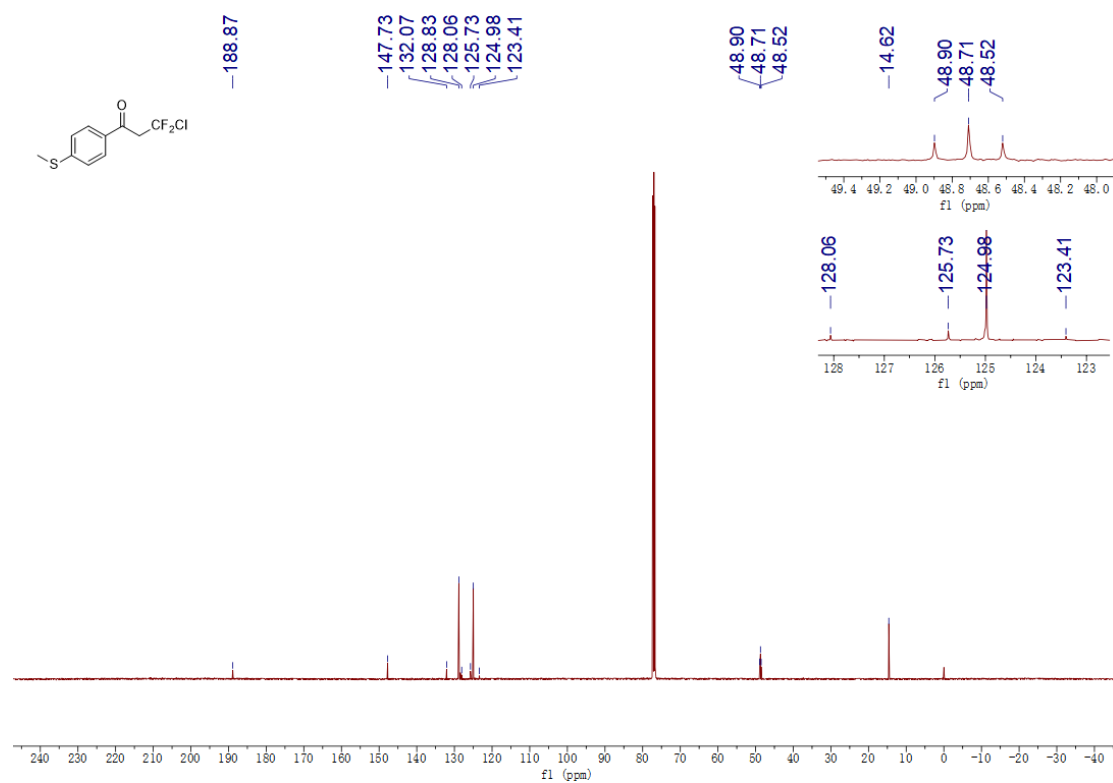

**<sup>19</sup>F NMR spectrum of 3-chloro-3,3-difluoro-1-(4-(methylthio)phenyl)propan-1-one 1g**

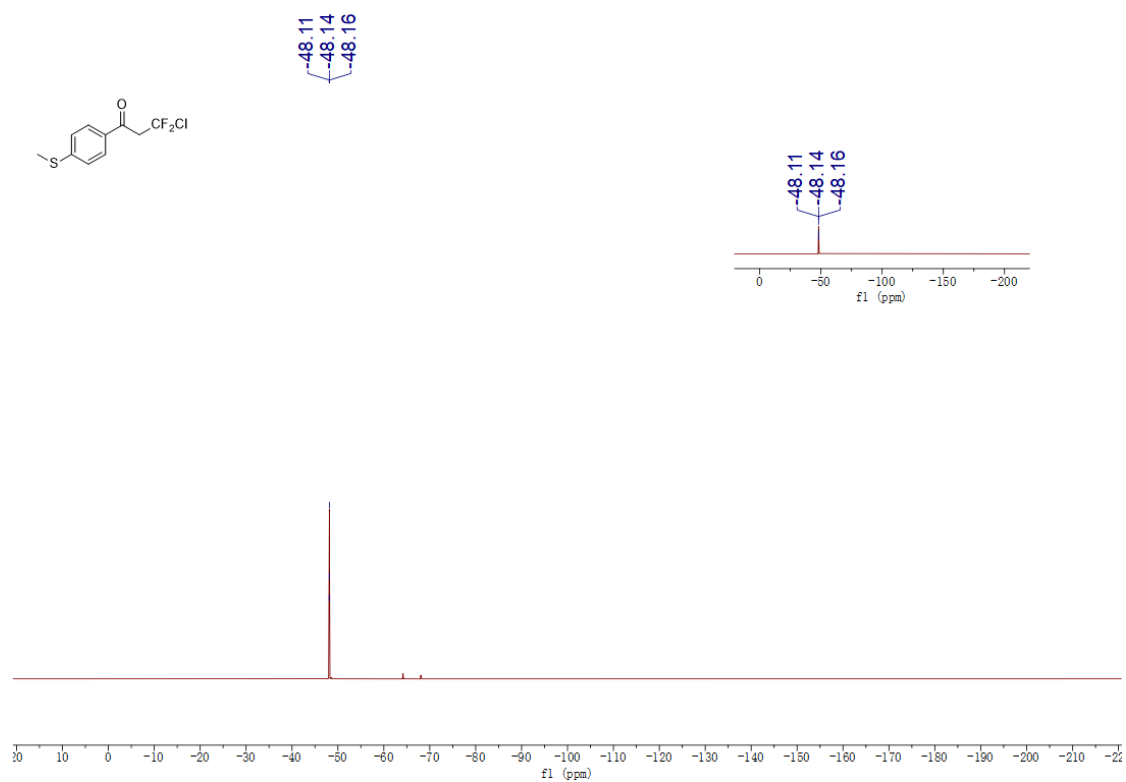

### <sup>1</sup>H NMR spectrum of 3-chloro-3,3-difluoro-1-(4-methoxyphenyl)propan-1-ol 2a

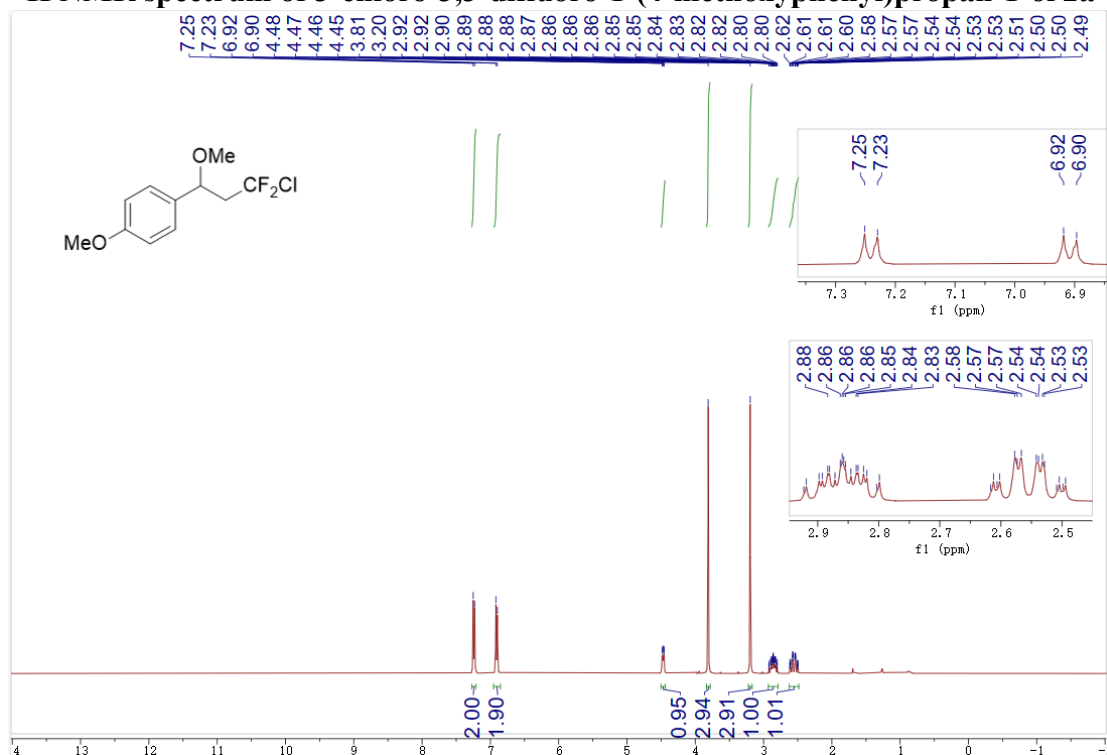

### <sup>13</sup>C NMR spectrum of 3-chloro-3,3-difluoro-1-(4-methoxyphenyl)propan-1-ol 2a

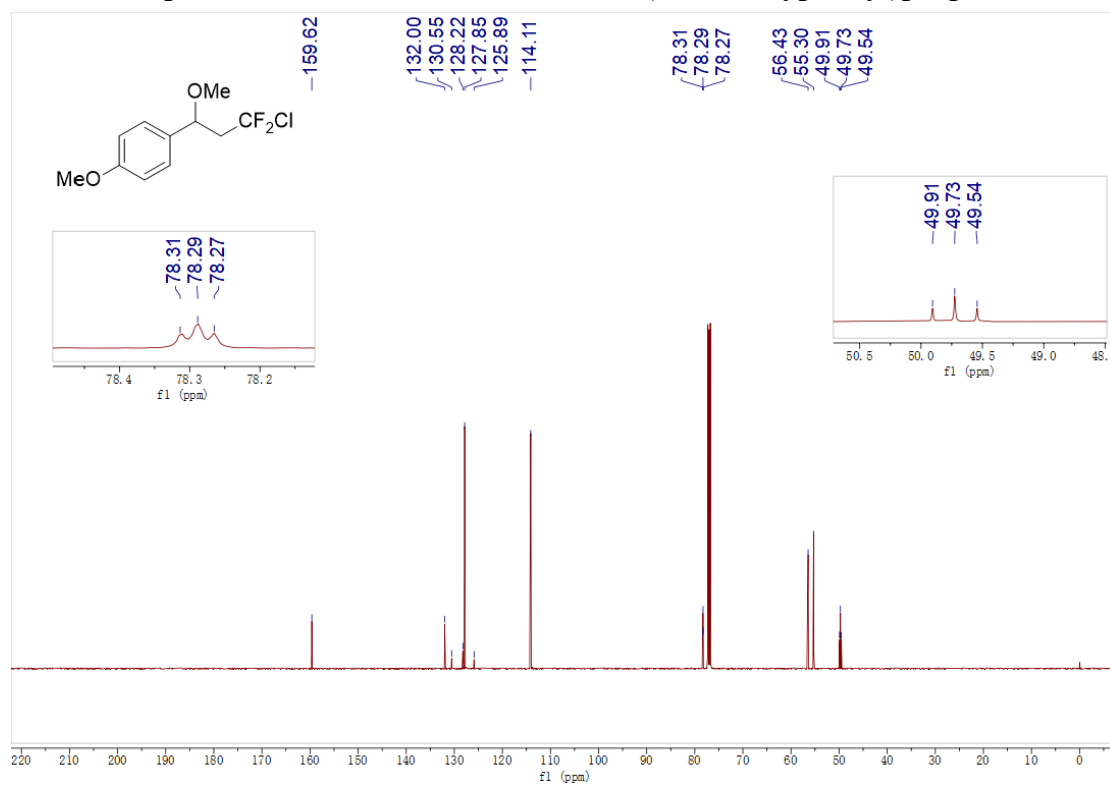

**$^{19}\text{F}$  NMR spectrum of 3-chloro-3,3-difluoro-1-(4-methoxyphenyl)propan-1-ol 2a**

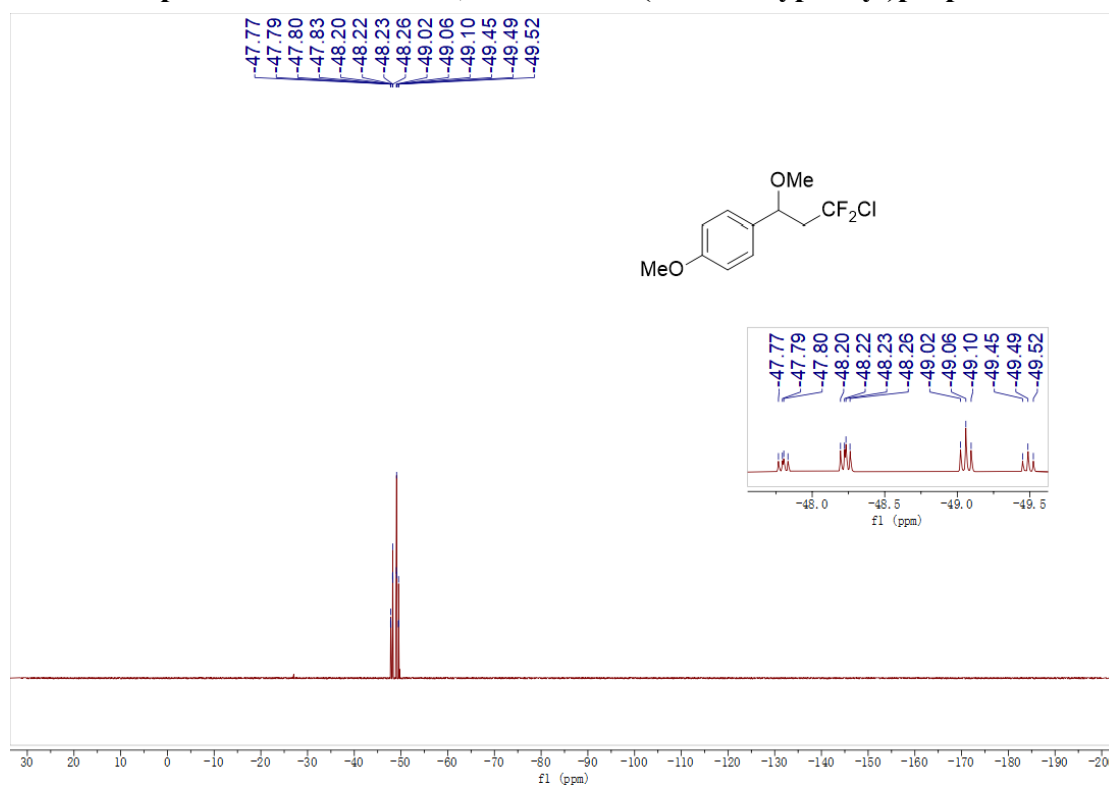

**$^1\text{H}$  NMR spectrum of 1-chloro-4-(3-chloro-3,3-difluoro-1-methoxypropyl)benzene 2b**

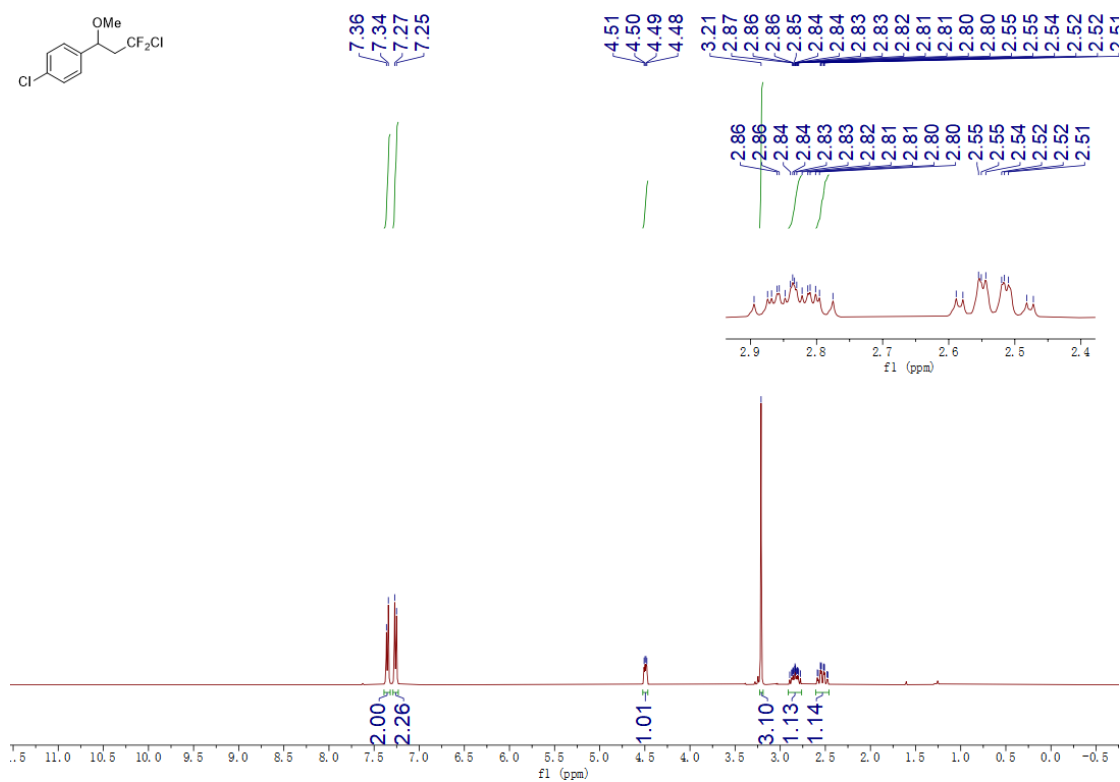



**<sup>13</sup>C NMR spectrum of 1-chloro-4-(3-chloro-3,3-difluoro-1-methoxypropyl)benzene 2b**

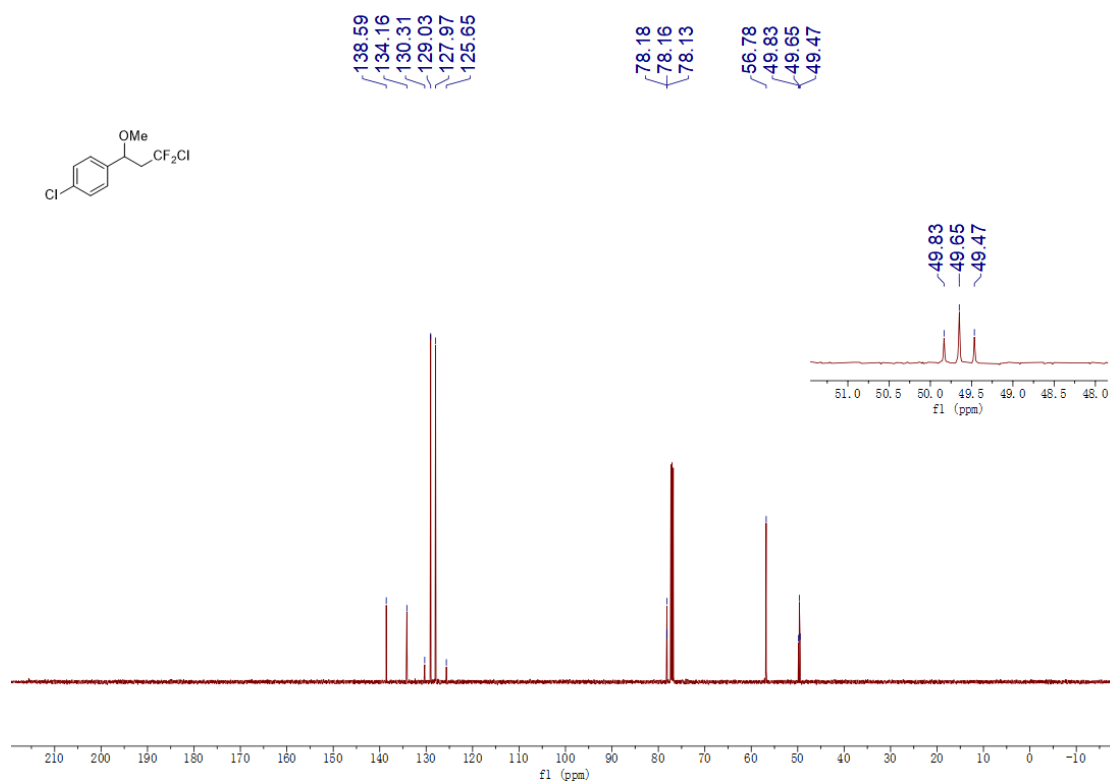

**<sup>19</sup>F NMR spectrum of 1-chloro-4-(3-chloro-3,3-difluoro-1-methoxypropyl)benzene 2b**

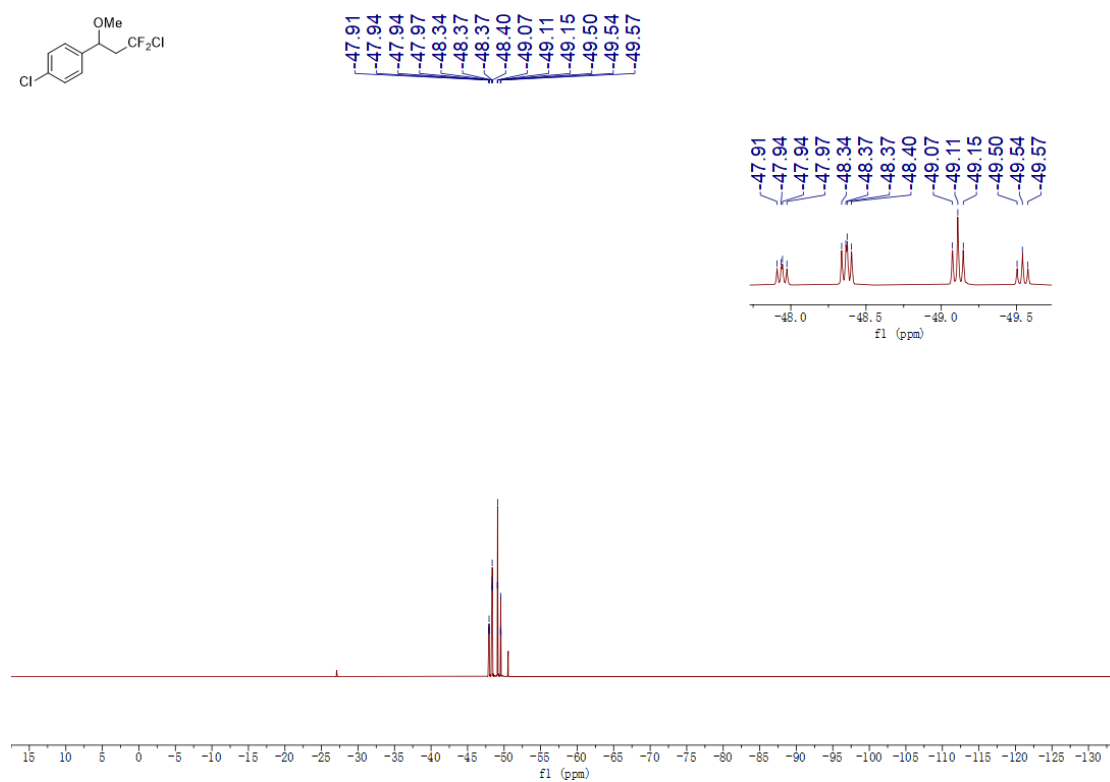

**<sup>1</sup>H NMR spectrum of 1-(tert-butyl)-4-(3-chloro-3,3-difluoro-1-methoxypropyl)benzene 2c**

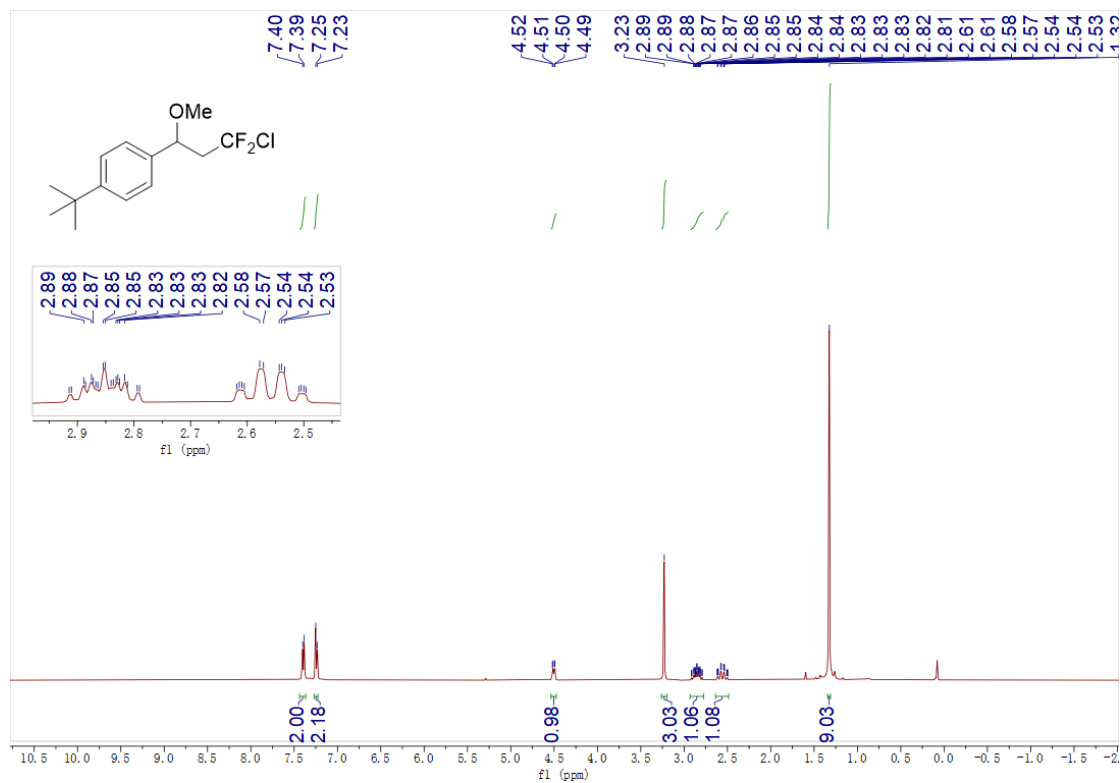

**<sup>13</sup>C NMR spectrum of 1-(tert-butyl)-4-(3-chloro-3,3-difluoro-1-methoxypropyl)benzene 2c**

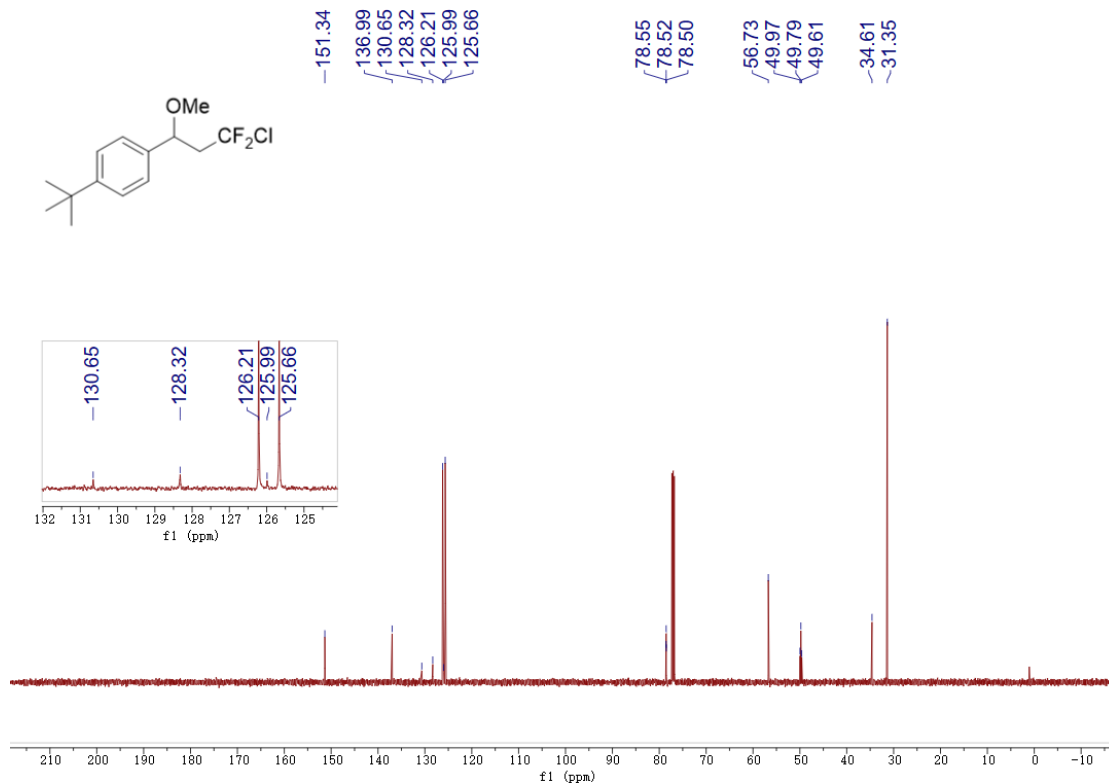

**<sup>19</sup>F NMR spectrum of 1-(tert-butyl)-4-(3-chloro-3,3-difluoro-1-methoxypropyl)benzene 2c**

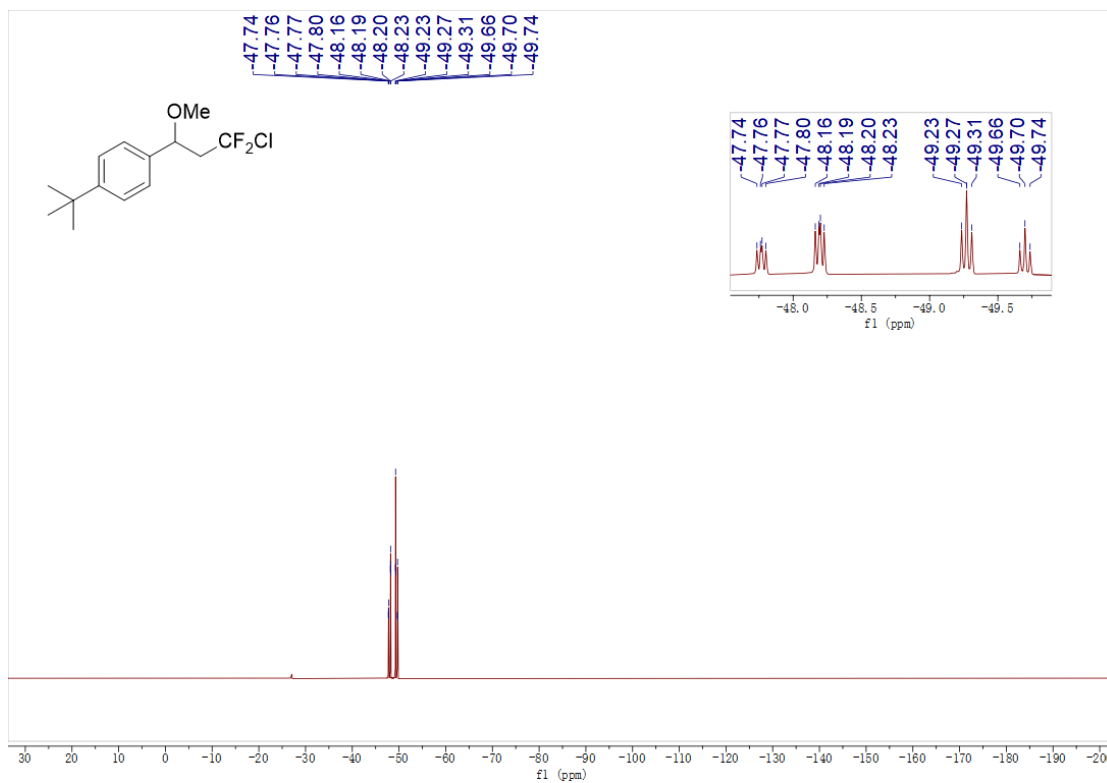

**<sup>1</sup>H NMR spectrum of 2-(3-chloro-3,3-difluoro-1-methoxypropyl)naphthalene 2d**

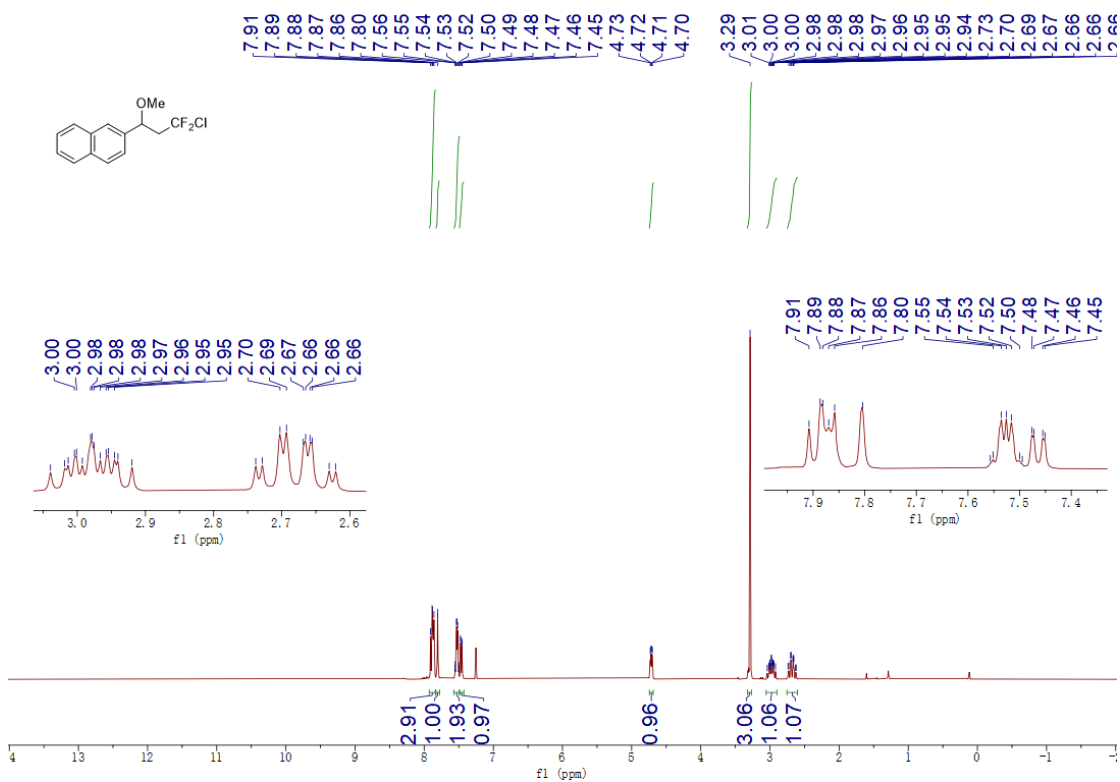

**<sup>13</sup>C NMR spectrum of 2-(3-chloro-3,3-difluoro-1-methoxypropyl)naphthalene 2d**

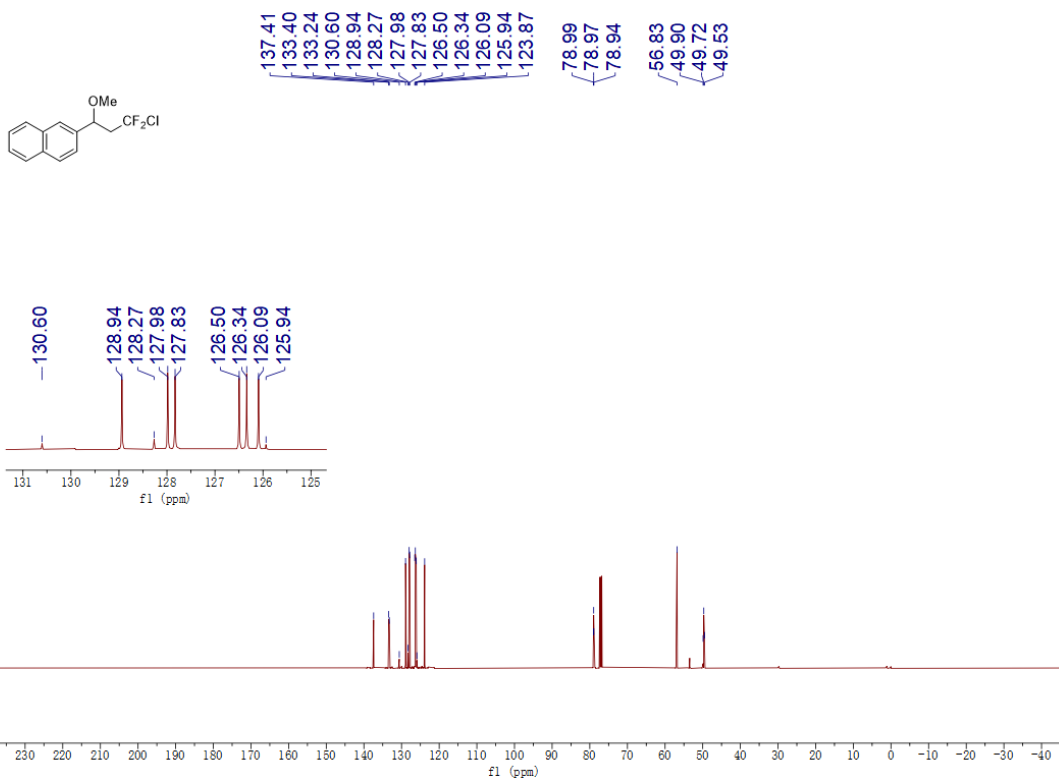

**<sup>19</sup>F NMR spectrum of 2-(3-chloro-3,3-difluoro-1-methoxypropyl)naphthalene 2d**

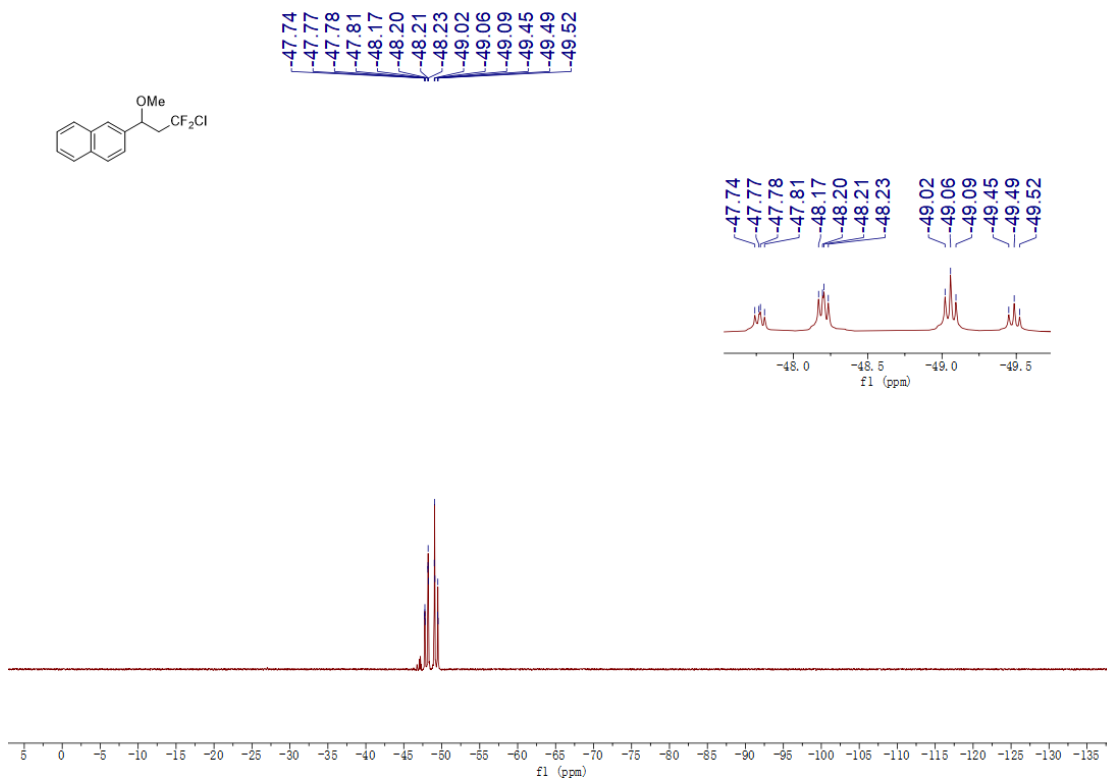

**<sup>1</sup>H NMR spectrum of 1-(3-chloro-1-ethoxy-3,3-difluoropropyl)-4-methoxybenzene 2e**

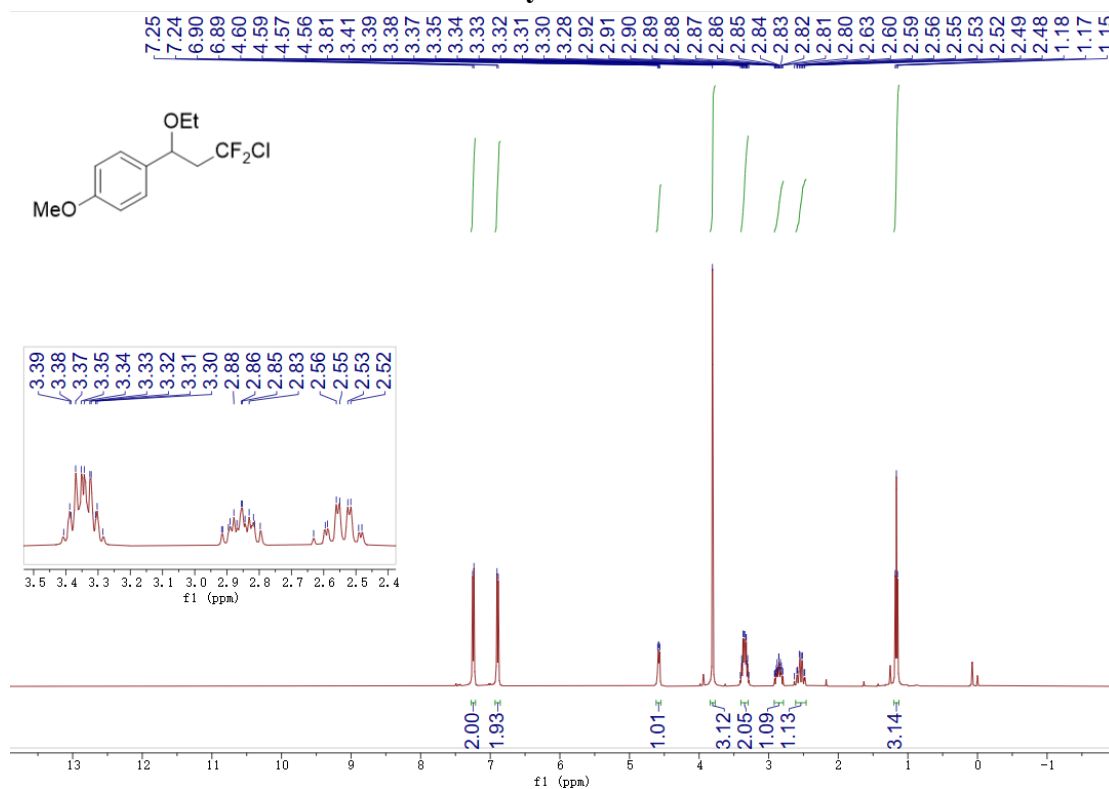

**<sup>13</sup>C NMR spectrum of 1-(3-chloro-1-ethoxy-3,3-difluoropropyl)-4-methoxybenzene 2e**

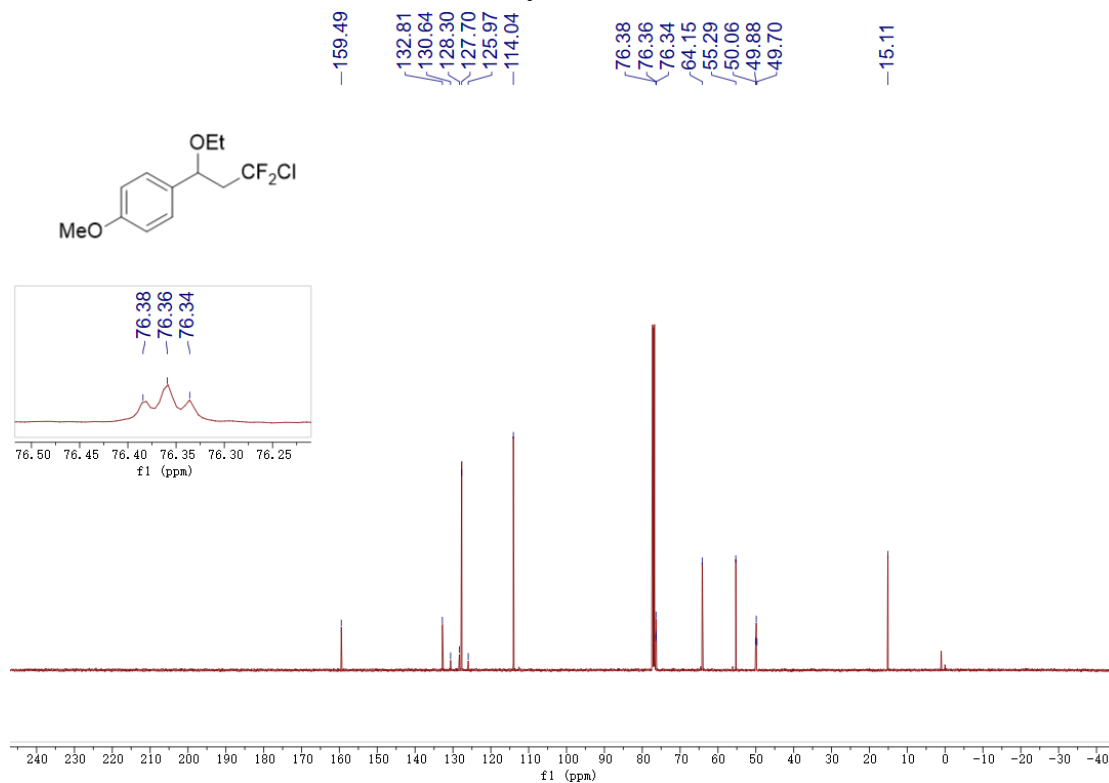

**<sup>19</sup>F NMR spectrum of 1-(3-chloro-1-ethoxy-3,3-difluoropropyl)-4-methoxybenzene 2e**

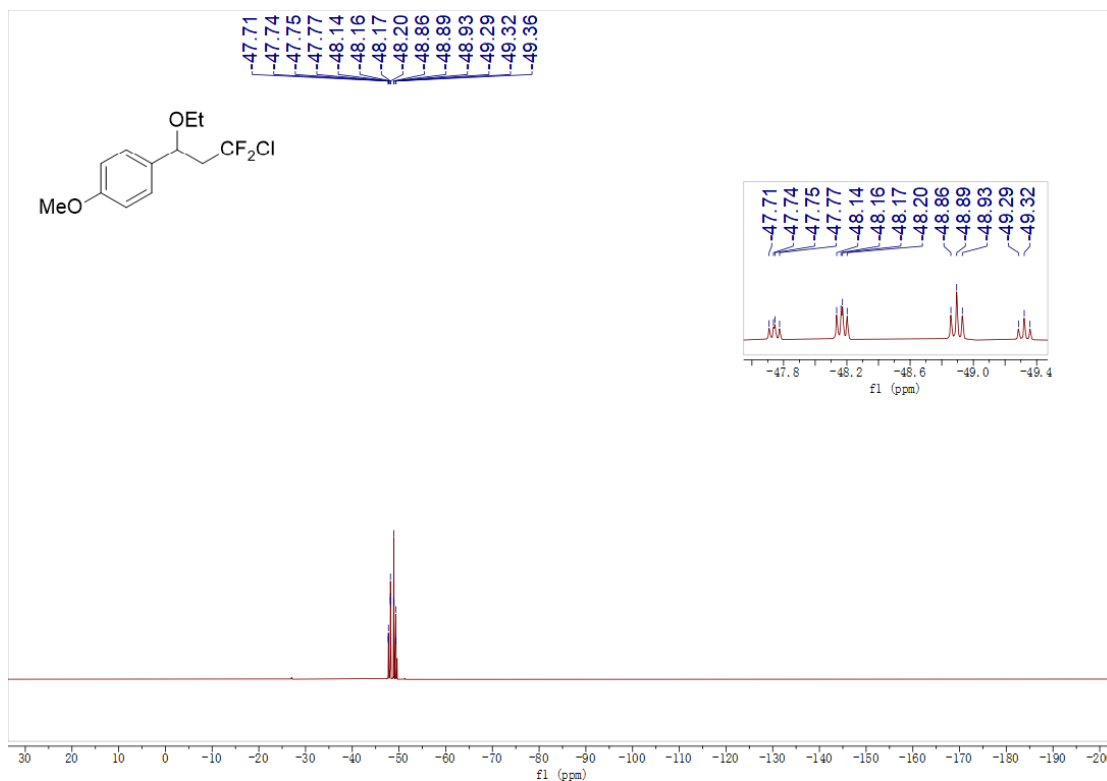

**<sup>1</sup>H NMR spectrum of 1-(3-chloro-3,3-difluoro-1-isopropoxypropyl)-4-methoxybenzene 2f**

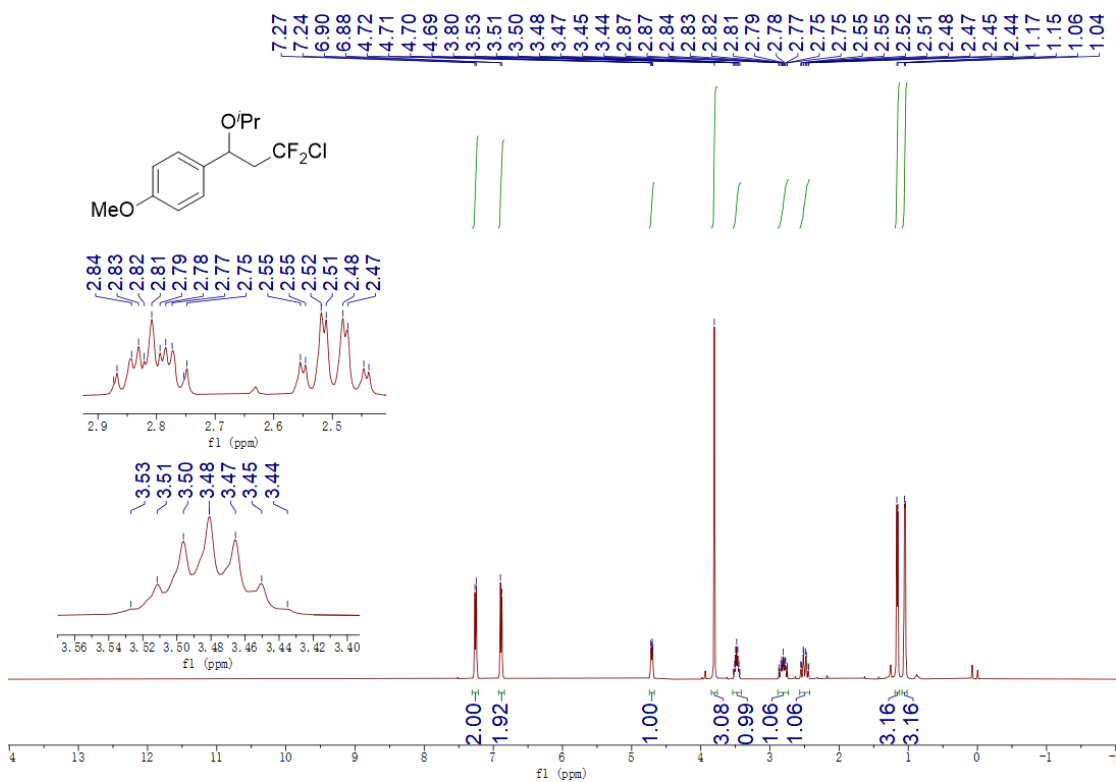

**<sup>13</sup>C NMR spectrum of 1-(3-chloro-3,3-difluoro-1-isopropoxypropyl)-4-methoxybenzene 2f**

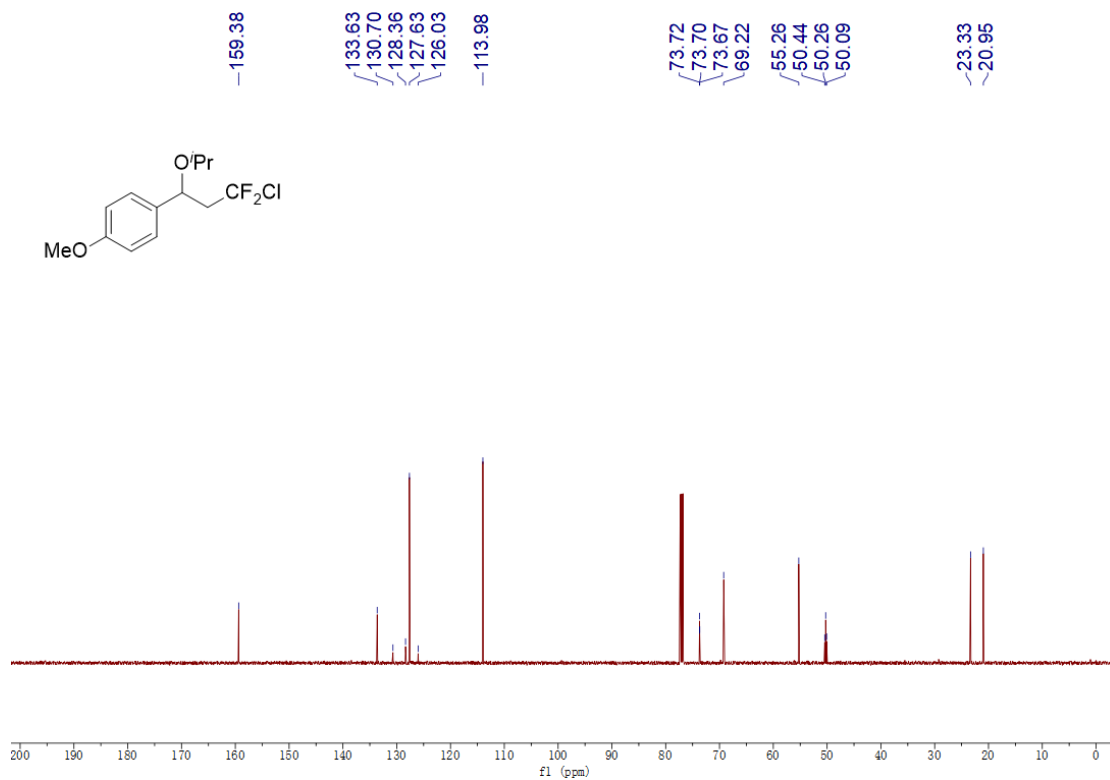

**<sup>19</sup>F NMR spectrum of 1-(3-chloro-3,3-difluoro-1-isopropoxypropyl)-4-methoxybenzene 2f**

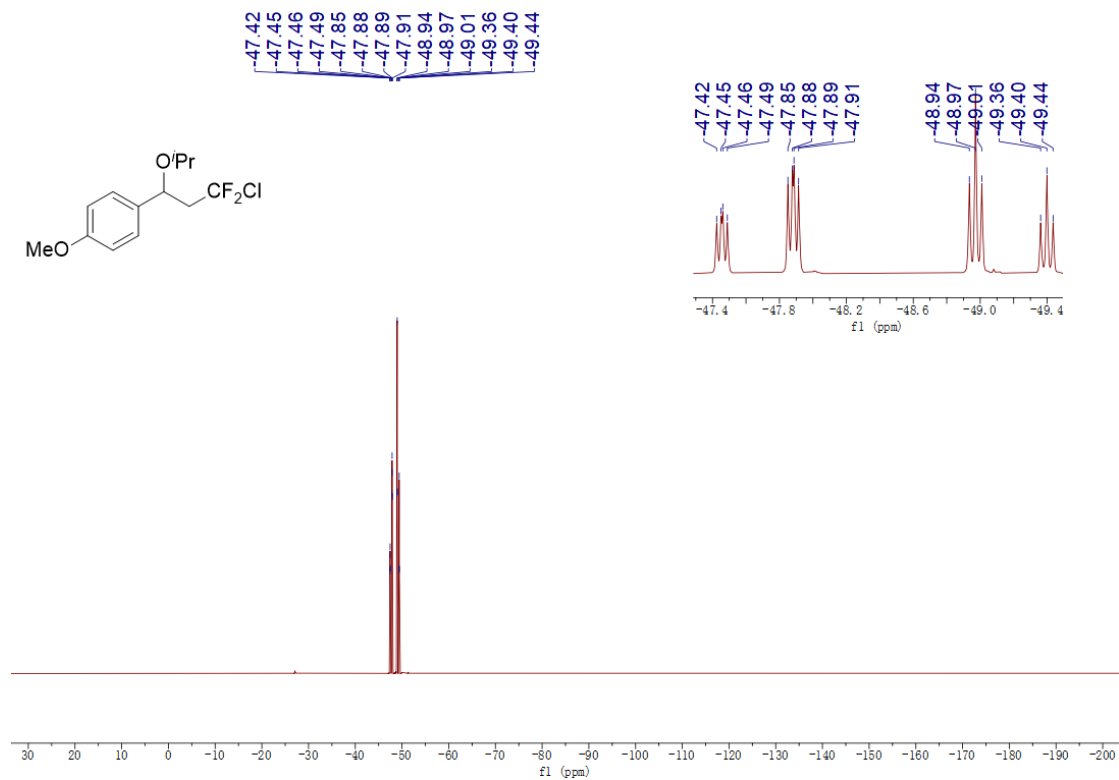

**<sup>1</sup>H NMR spectrum of 1-(1-azido-3-chloro-3,3-difluoropropyl)-4-methoxybenzene 2g**

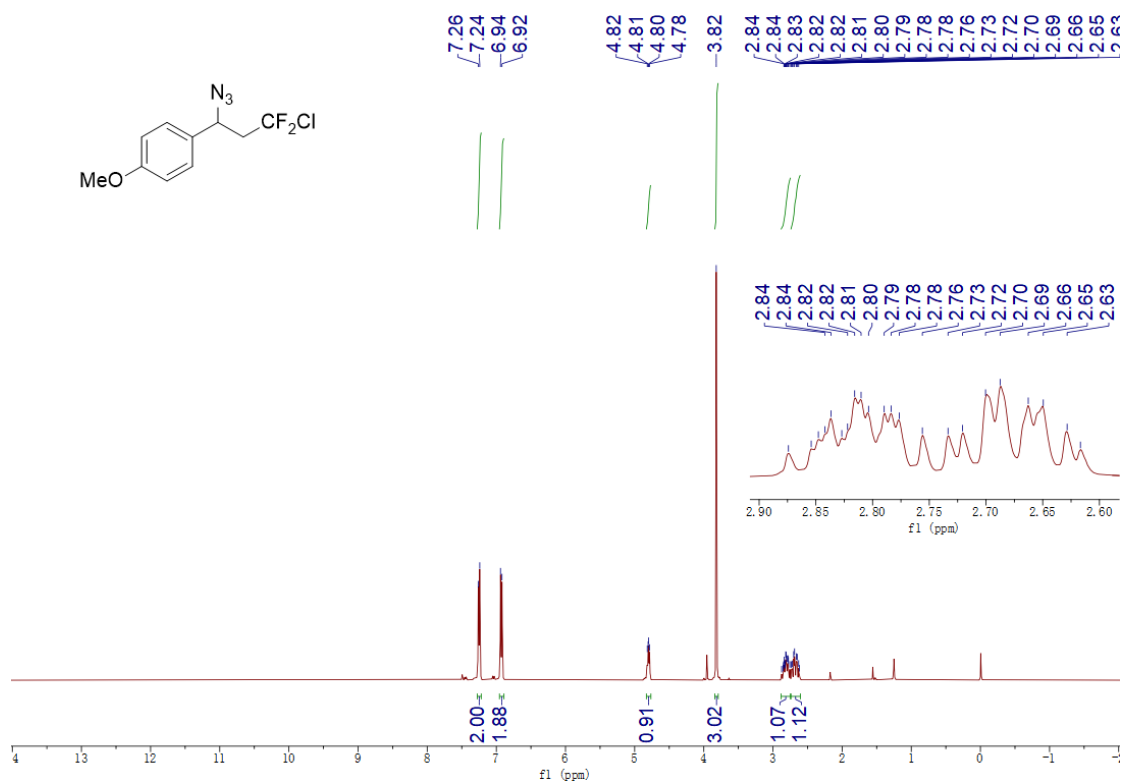

**<sup>13</sup>C NMR spectrum of 1-(1-azido-3-chloro-3,3-difluoropropyl)-4-methoxybenzene 2g**

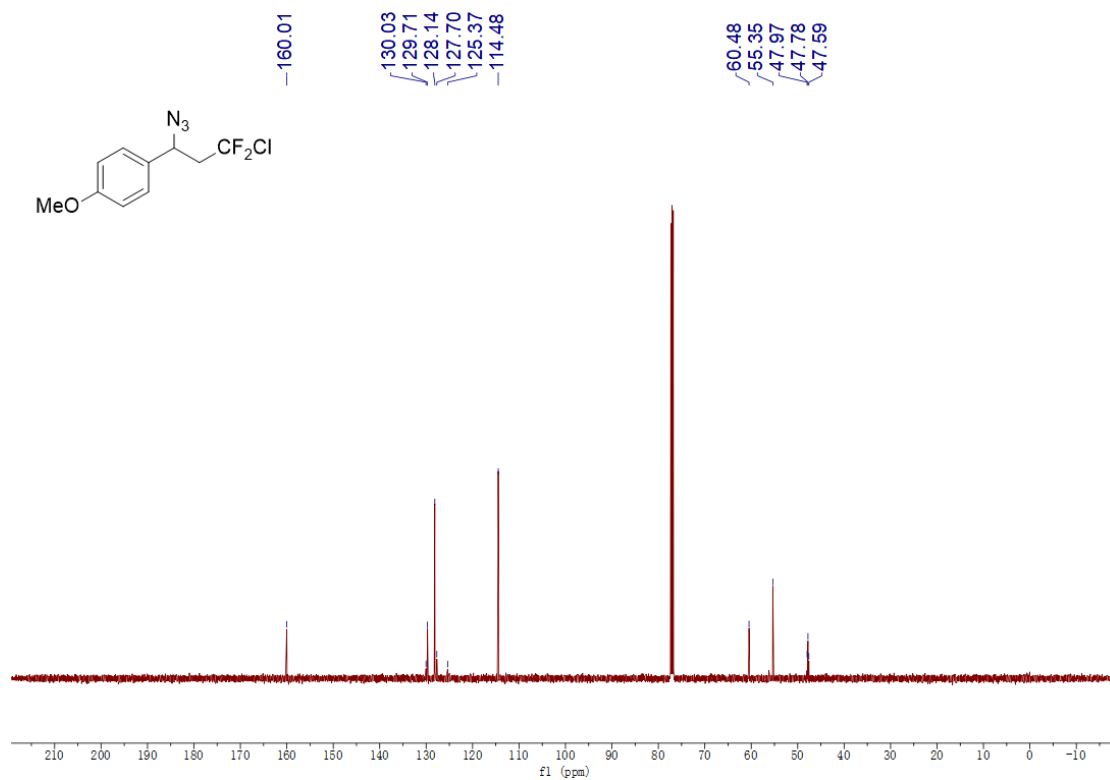



**<sup>19</sup>F NMR spectrum of 1-(1-azido-3-chloro-3,3-difluoropropyl)-4-methoxybenzene 2g**

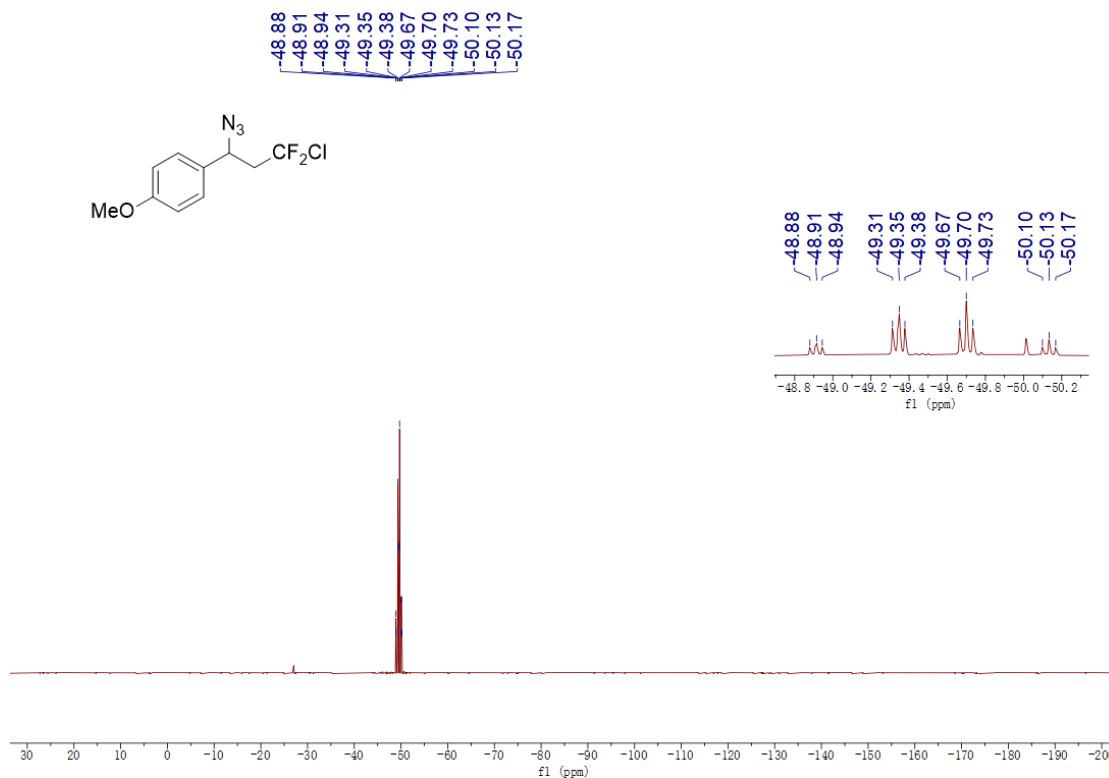

**<sup>1</sup>H NMR spectrum of 1-(1-azido-3-chloro-3,3-difluoropropyl)-4-(tert-butyl)benzene 2h**

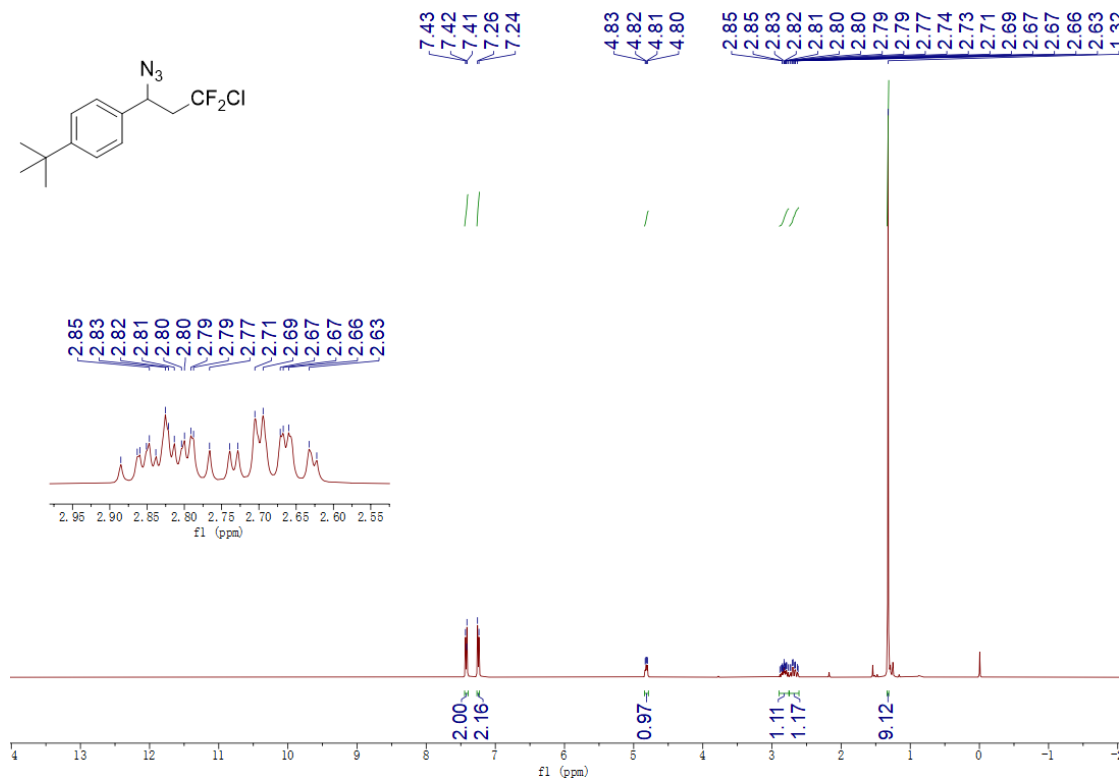

**<sup>13</sup>C NMR spectrum of 1-(1-azido-3-chloro-3,3-difluoropropyl)-4-(tert-butyl)benzene 2h**

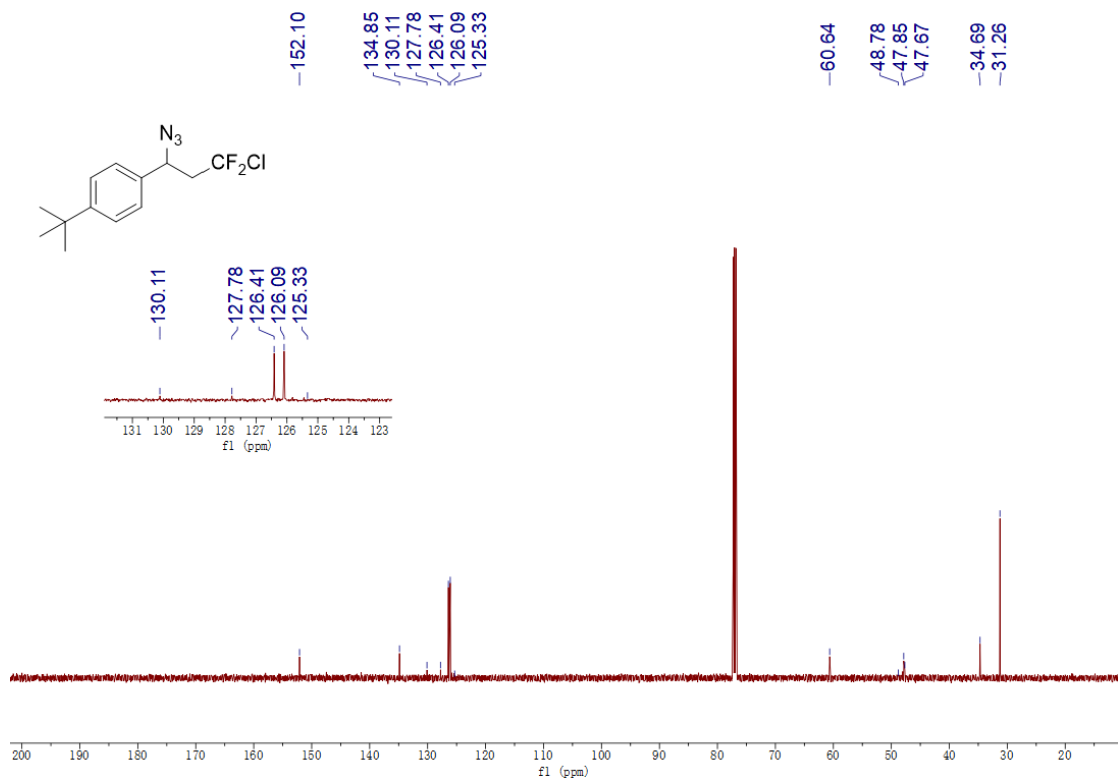

**<sup>19</sup>F NMR spectrum of 1-(1-azido-3-chloro-3,3-difluoropropyl)-4-(tert-butyl)benzene 2h**

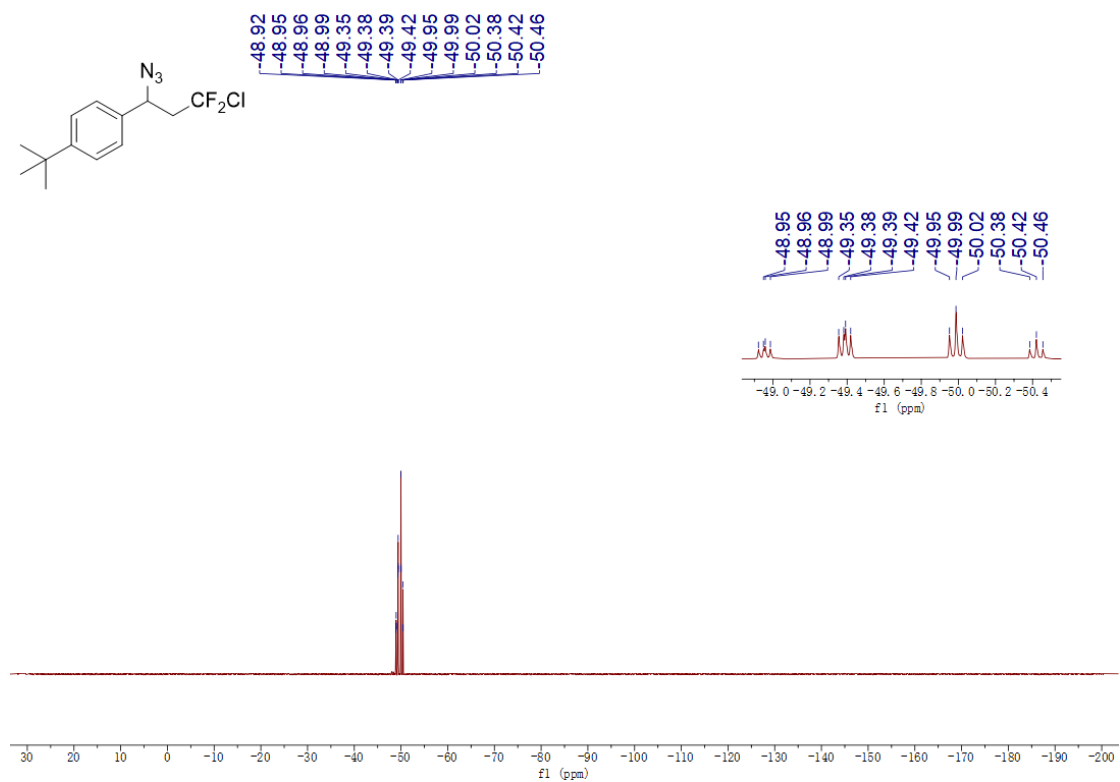

**<sup>1</sup>H NMR spectrum of 1-(1-azido-3-chloro-3,3-difluoropropyl)-4-chlorobenzene 3i**

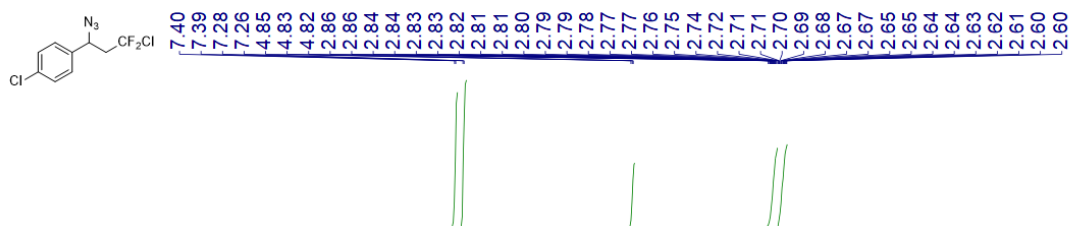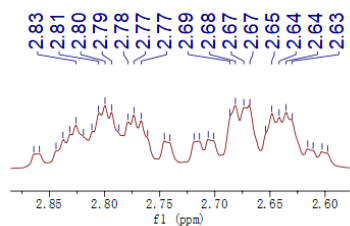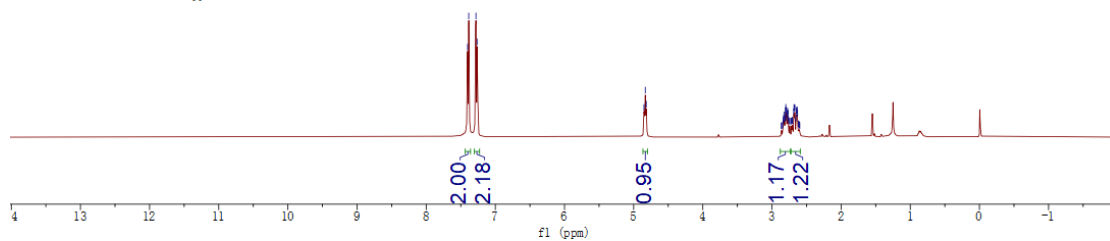

**<sup>13</sup>C NMR spectrum of 1-(1-azido-3-chloro-3,3-difluoropropyl)-4-chlorobenzene 3i**

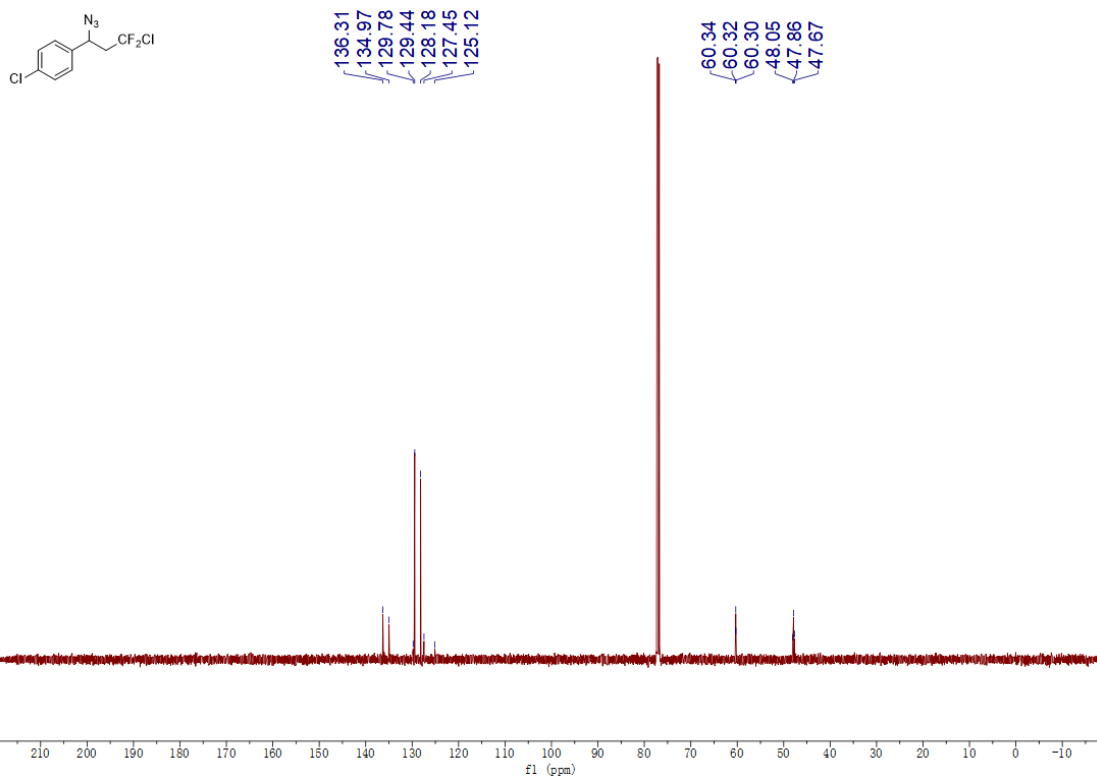

**<sup>19</sup>F NMR spectrum of 1-(1-azido-3-chloro-3,3-difluoropropyl)-4-chlorobenzene 3i**

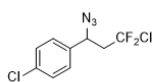

49.04  
49.07  
49.10  
49.47  
49.50  
49.54  
49.75  
49.79  
49.82  
50.19  
50.22  
50.26

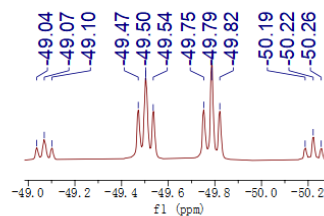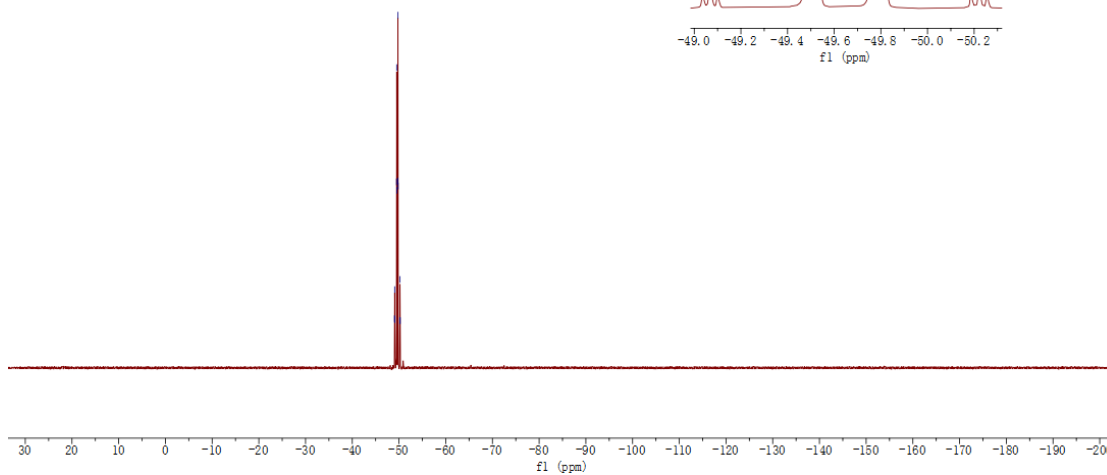

**<sup>1</sup>H NMR spectrum of 8-(chlorodifluoromethyl)-1,3,7-trimethyl-3,7-dihydro-1H-purine-2,6-dione 3a**

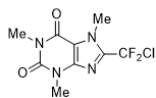

4.16  
3.58  
3.40

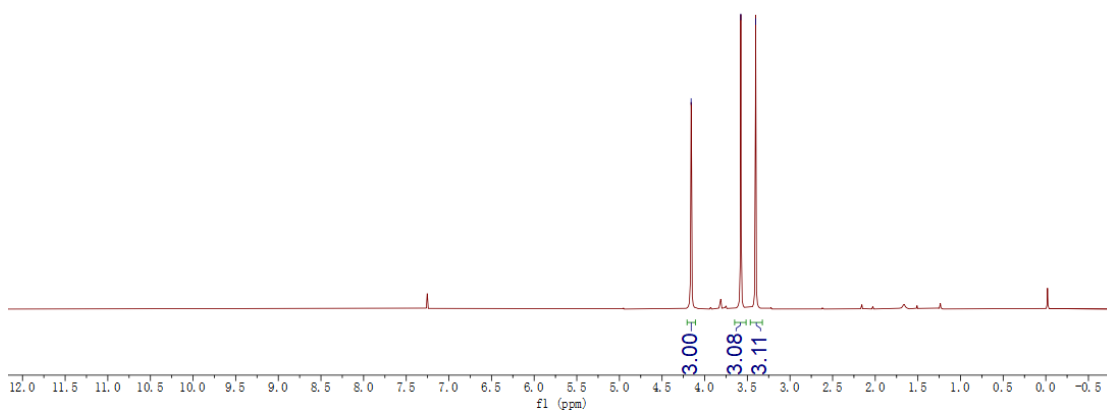

**<sup>13</sup>C NMR spectrum of 8-(chlorodifluoromethyl)-1,3,7-trimethyl-3,7-dihydro-1H-purine-2,6-dione 3a**

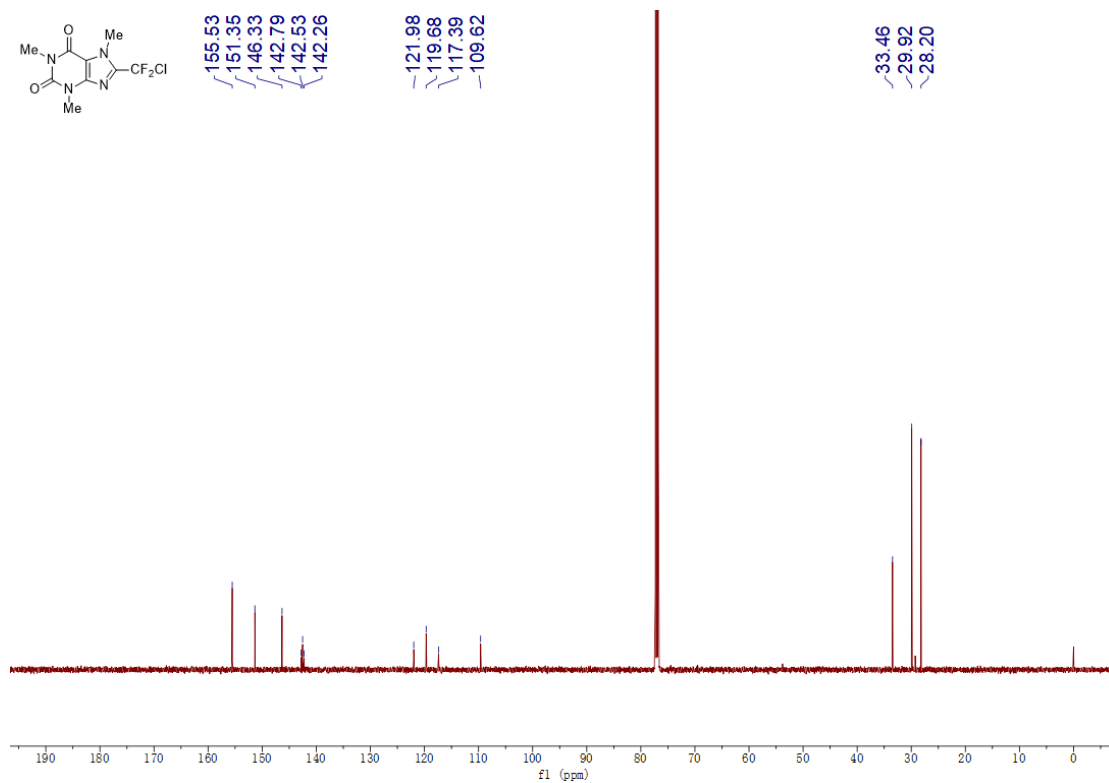

**<sup>19</sup>F NMR spectrum of 8-(chlorodifluoromethyl)-1,3,7-trimethyl-3,7-dihydro-1H-purine-2,6-dione 3a**

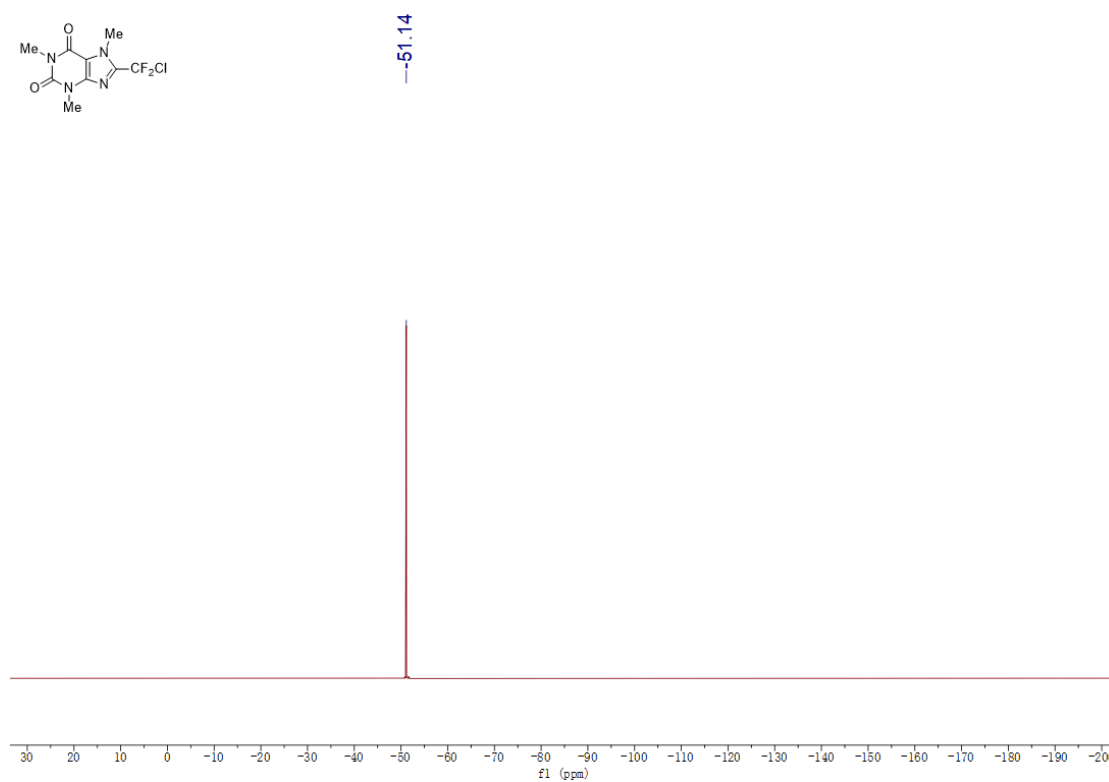

**<sup>1</sup>H NMR spectrum of 8-(chlorodifluoromethyl)-1-(3-chloropropyl)-3,7-dimethyl-3,7-dihydro-1H-purine-2,6-dione 3b**

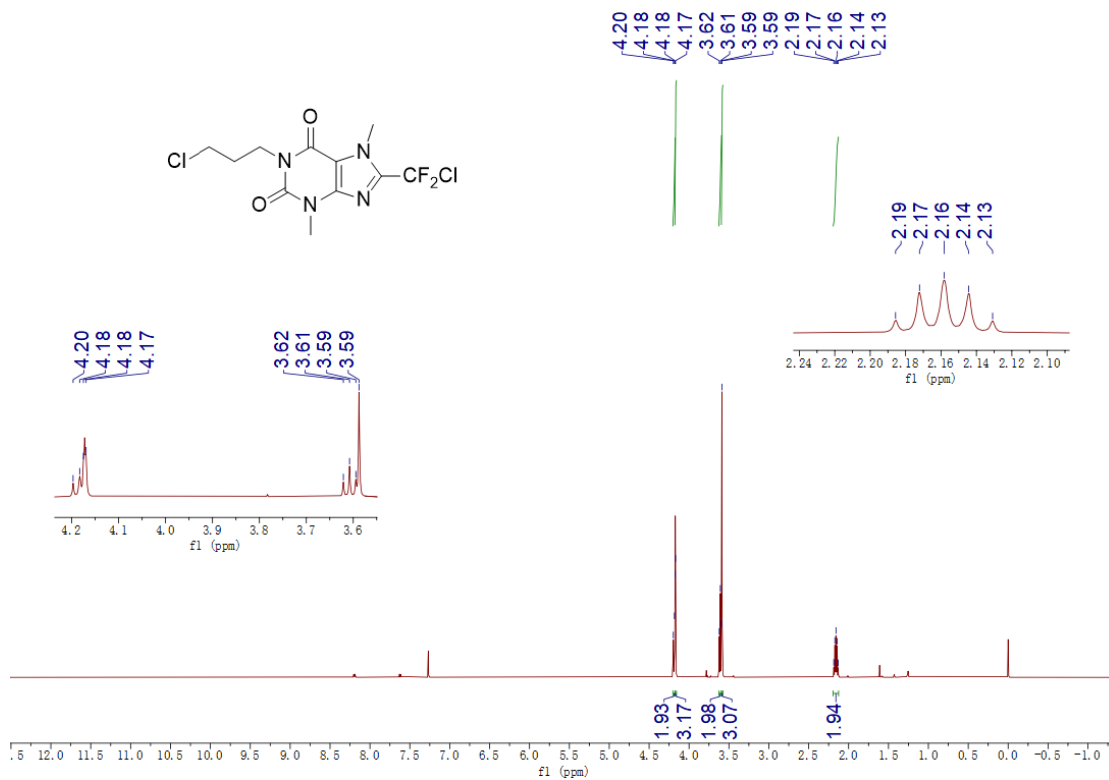

**<sup>13</sup>C NMR spectrum of 8-(chlorodifluoromethyl)-1-(3-chloropropyl)-3,7-dimethyl-3,7-dihydro-1H-purine-2,6-dione 3b**

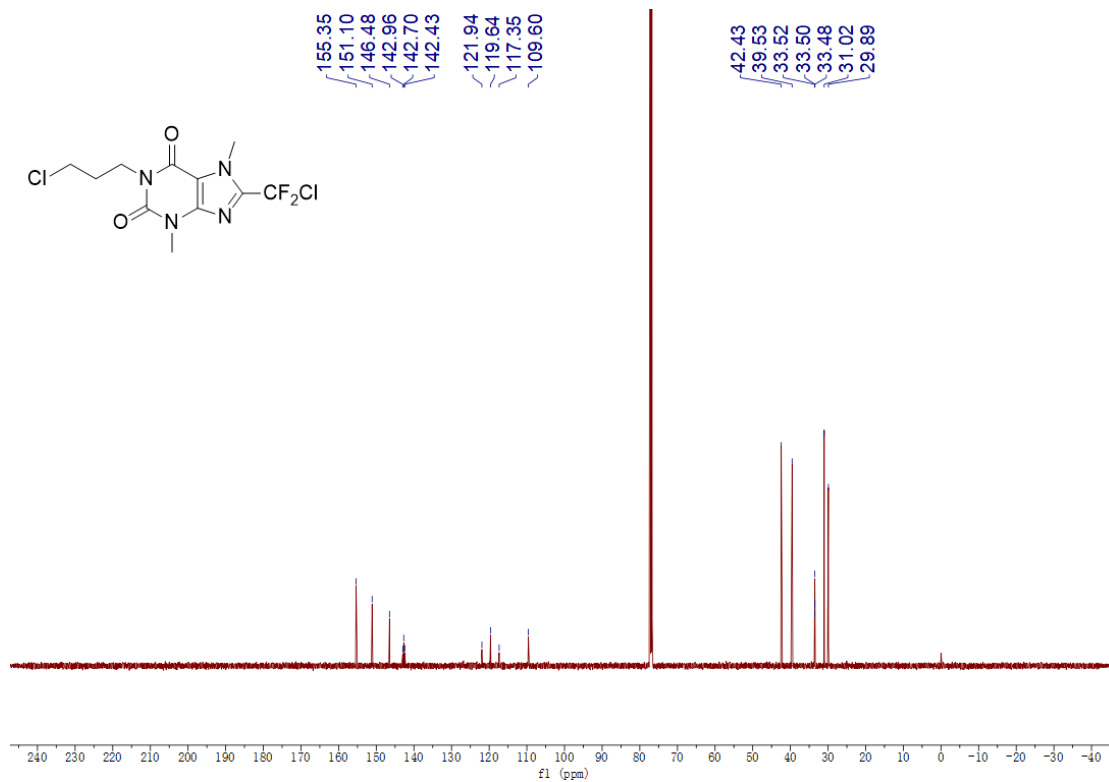

**<sup>19</sup>F NMR spectrum of 8-(chlorodifluoromethyl)-1-(3-chloropropyl)-3,7-dimethyl-3,7-dihydro-1H-purine-2,6-dione 3b**

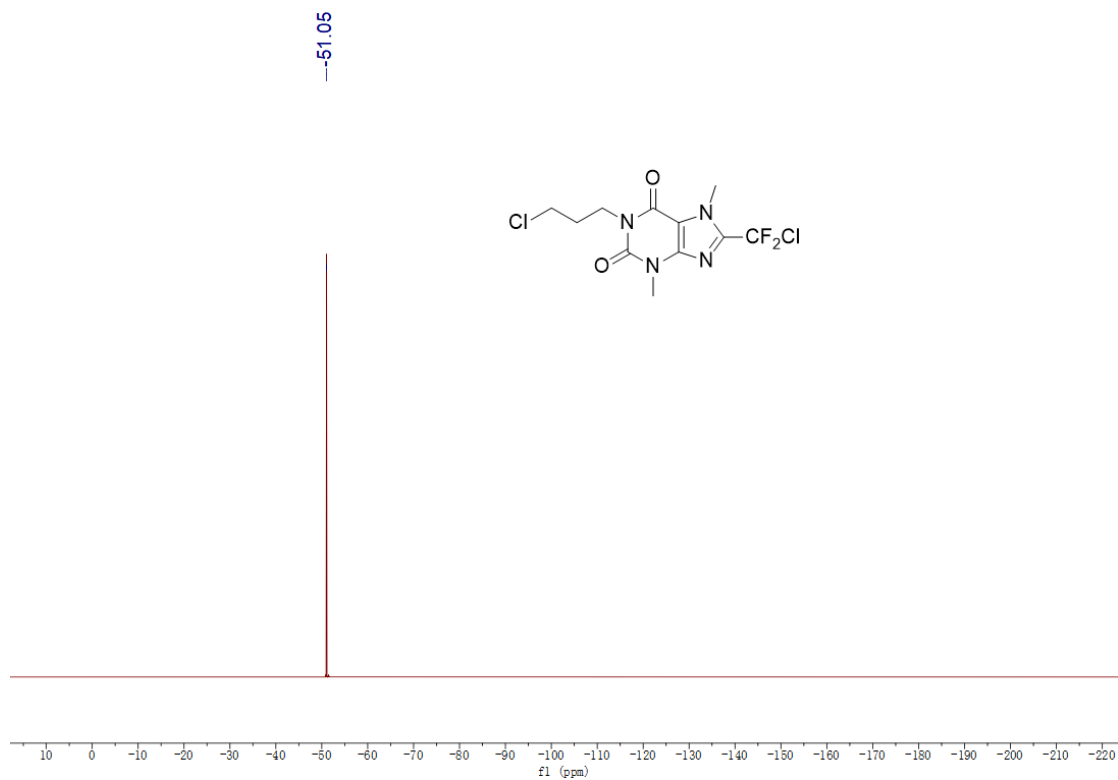

**<sup>1</sup>H NMR spectrum of 8-(chlorodifluoromethyl)-7-(2-chloroethyl)-1,3-dimethyl-3,7-dihydro-1H-purine-2,6-dione 3c**

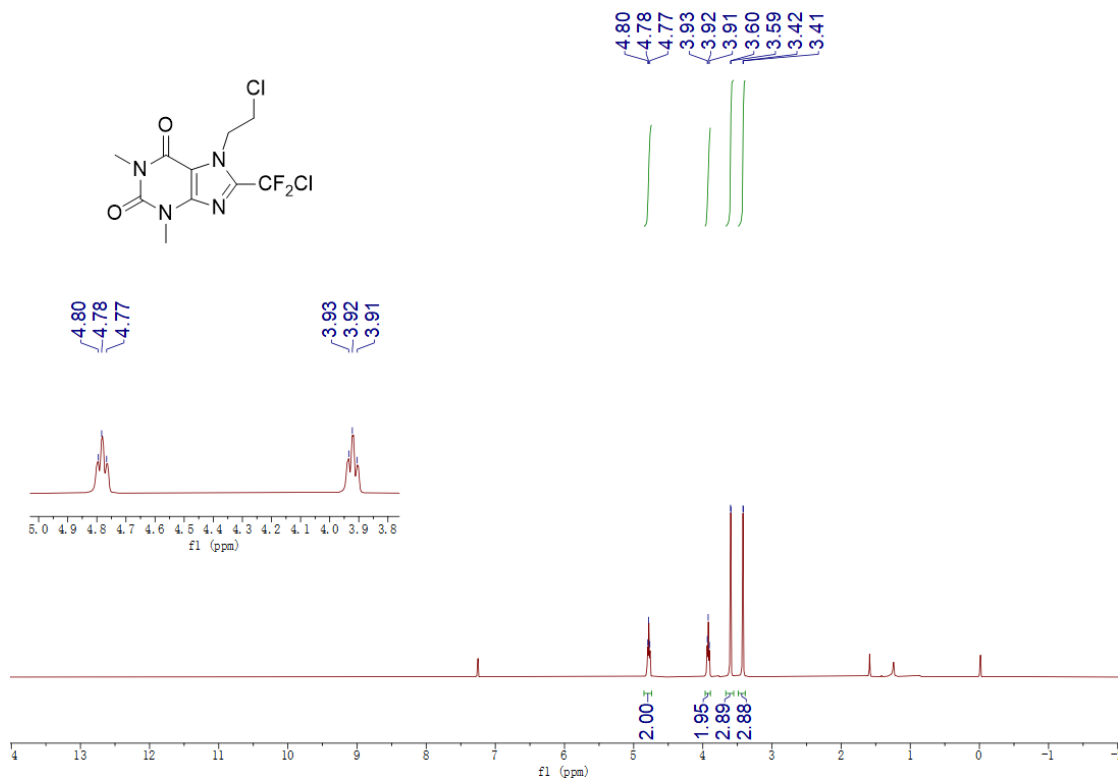

**<sup>13</sup>C NMR spectrum of 8-(chlorodifluoromethyl)-7-(2-chloroethyl)-1,3-dimethyl-3,7-dihydro-1H-purine-2,6-dione 3c**

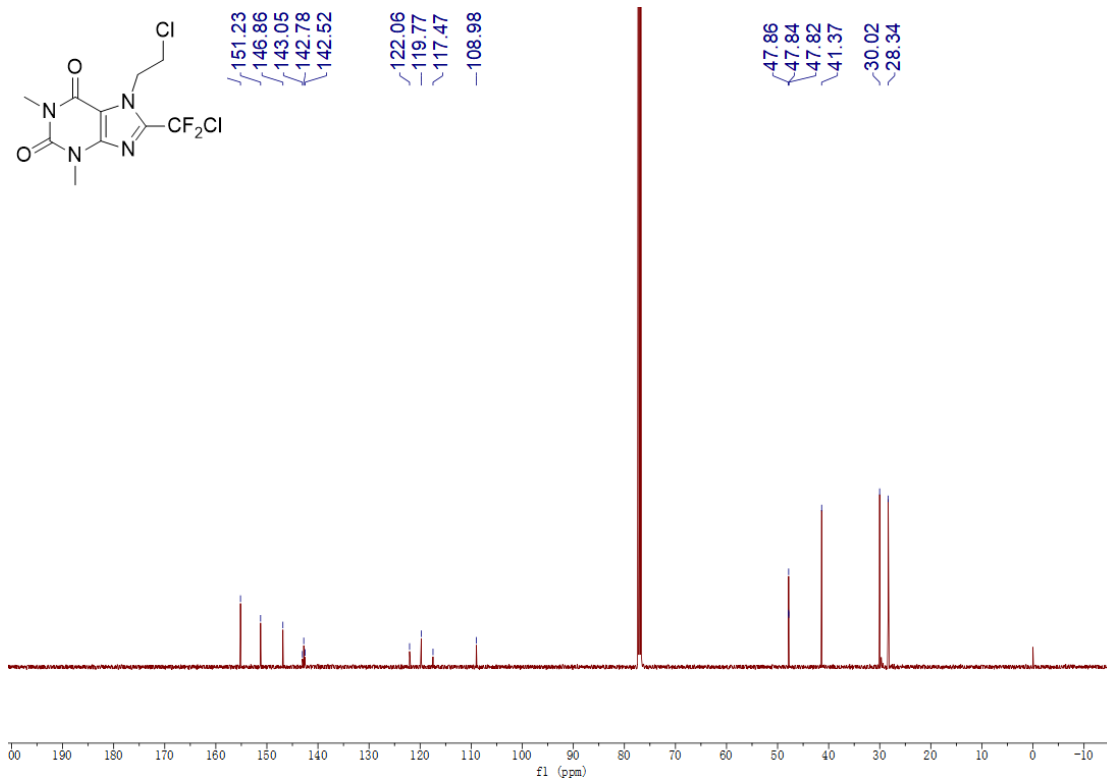

**<sup>19</sup>F NMR spectrum of 8-(chlorodifluoromethyl)-7-(2-chloroethyl)-1,3-dimethyl-3,7-dihydro-1H-purine-2,6-dione 3c**

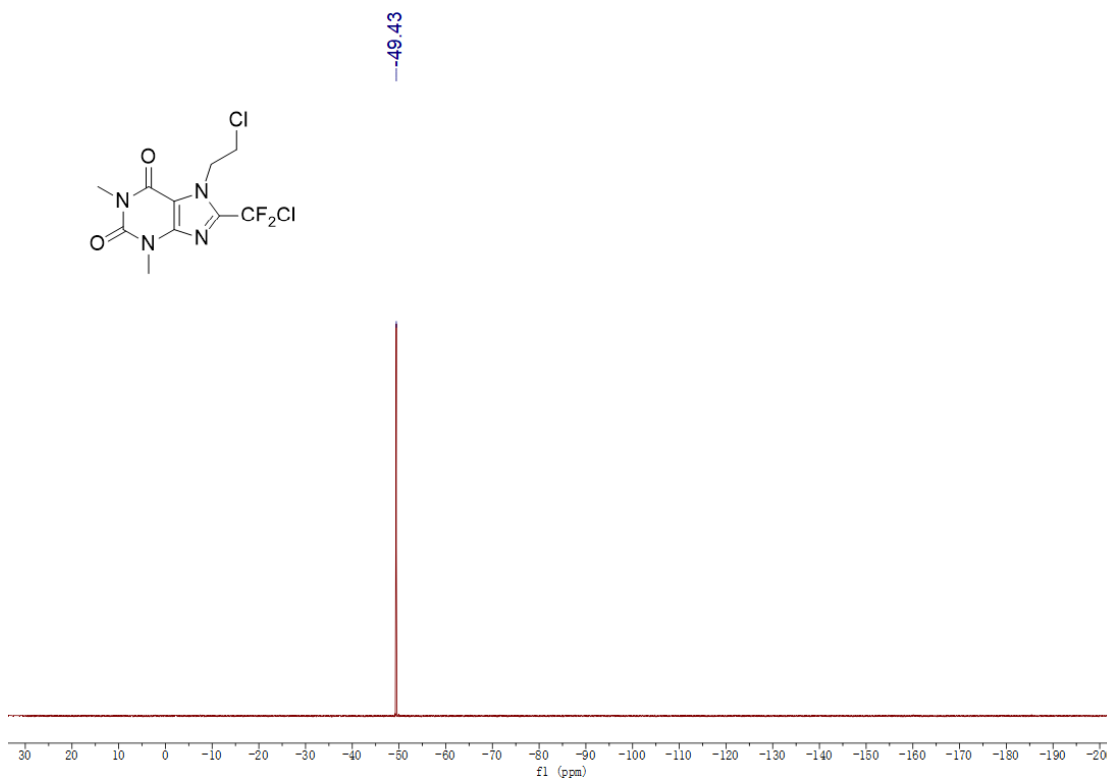



**<sup>1</sup>H NMR spectrum of 8-(chlorodifluoromethyl)-1-hexyl-3,7-dimethyl-3,7-dihydro-1H-purine-2,6-dione 3d**

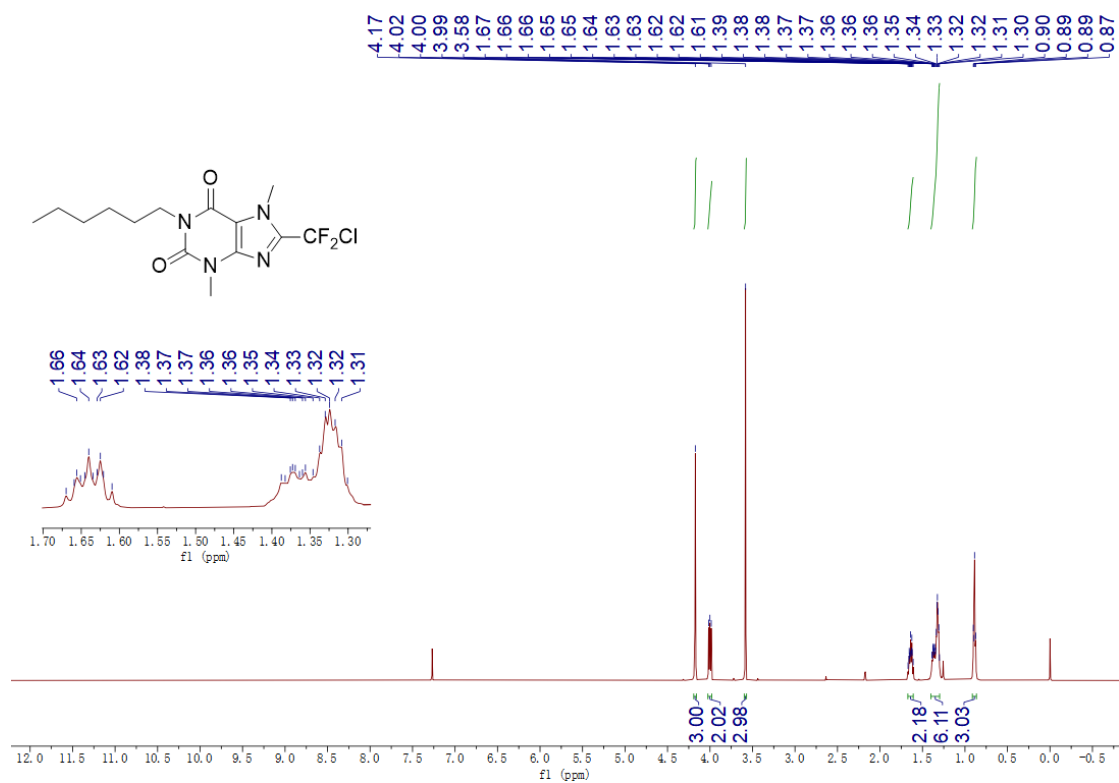

**<sup>13</sup>C NMR spectrum of 8-(chlorodifluoromethyl)-1-hexyl-3,7-dimethyl-3,7-dihydro-1H-purine-2,6-dione 3d**

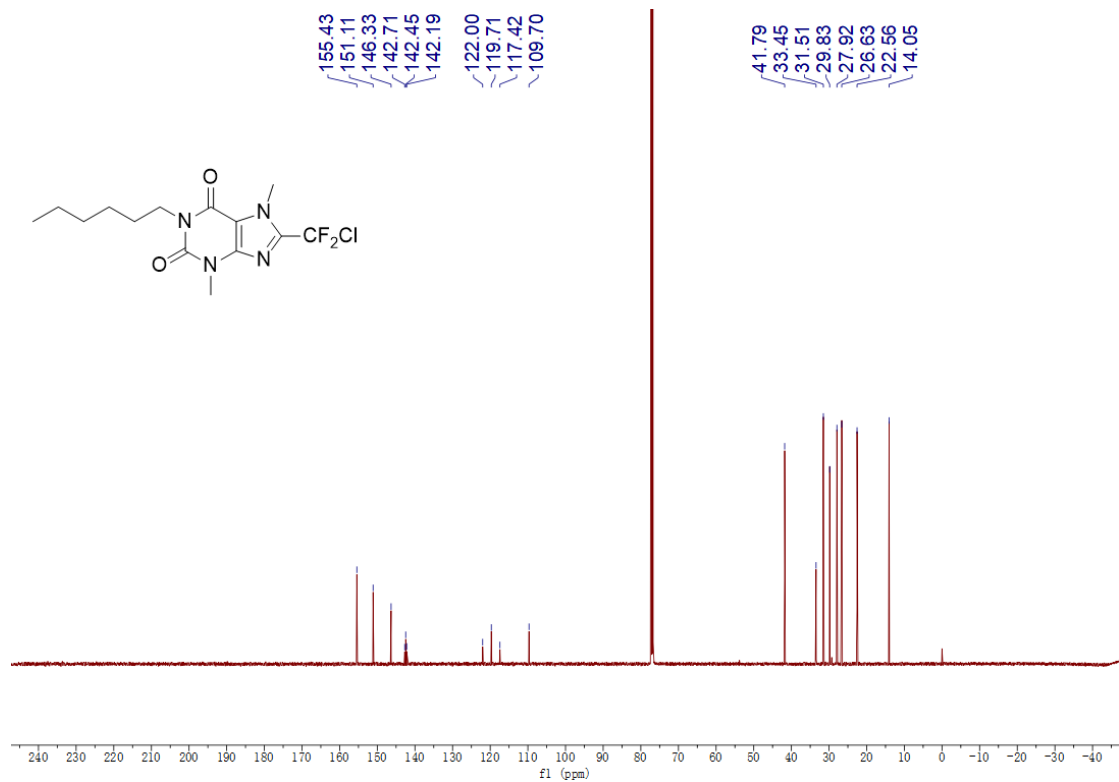

**<sup>19</sup>F NMR spectrum of 8-(chlorodifluoromethyl)-1-hexyl-3,7-dimethyl-3,7-dihydro-1H-purine-2,6-dione 3d**

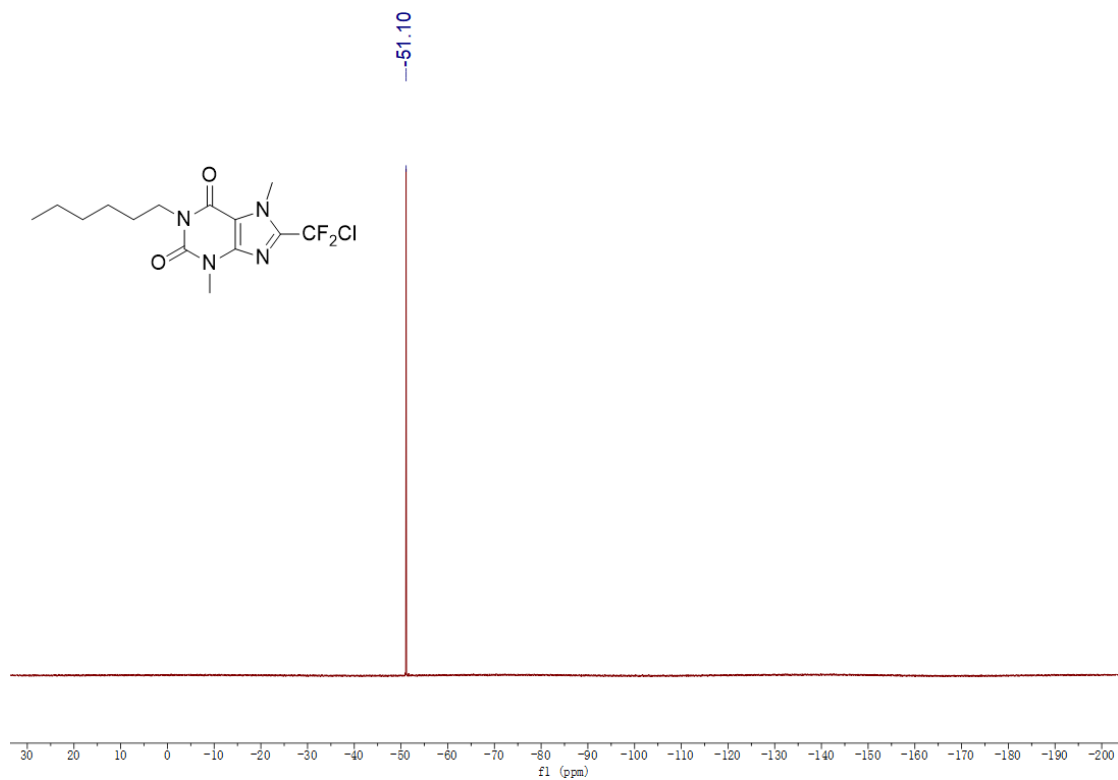

**<sup>1</sup>H NMR spectrum of 4-(*tert*-butyl)-2-(chlorodifluoromethyl)-1-methoxybenzene 3e**

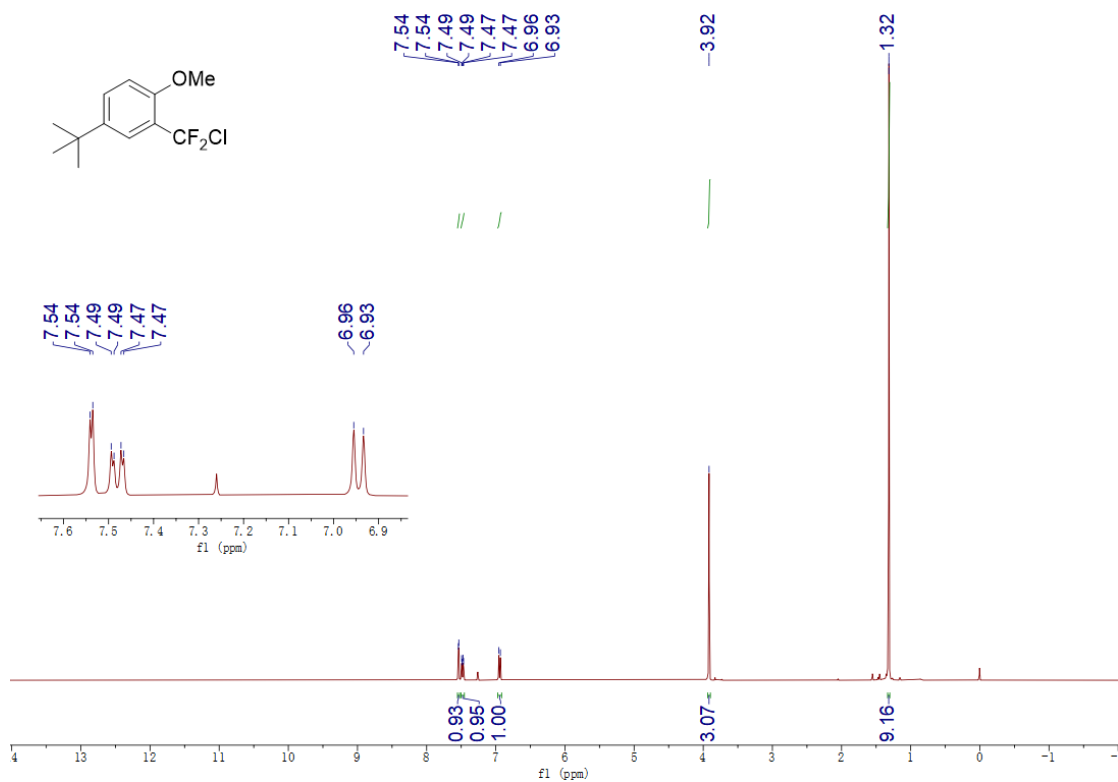

**<sup>13</sup>C NMR spectrum of 4-(*tert*-butyl)-2-(chlorodifluoromethyl)-1-methoxybenzene 3e**

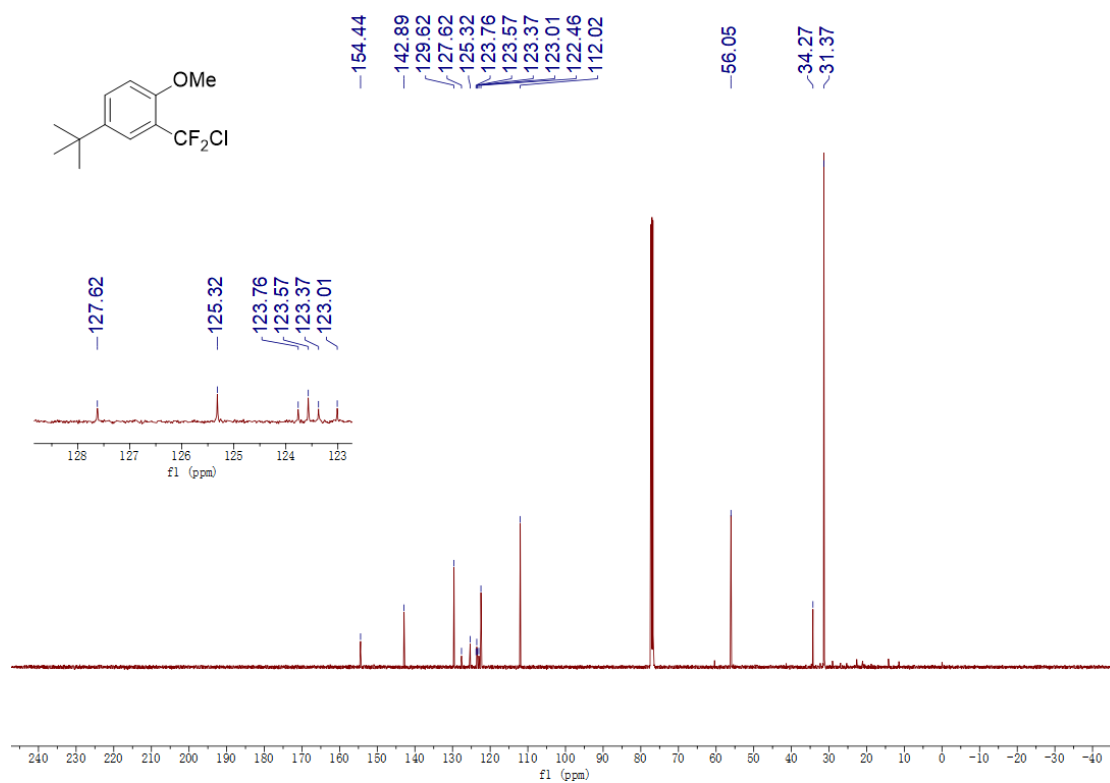

**<sup>19</sup>F NMR spectrum of 4-(*tert*-butyl)-2-(chlorodifluoromethyl)-1-methoxybenzene 3e**

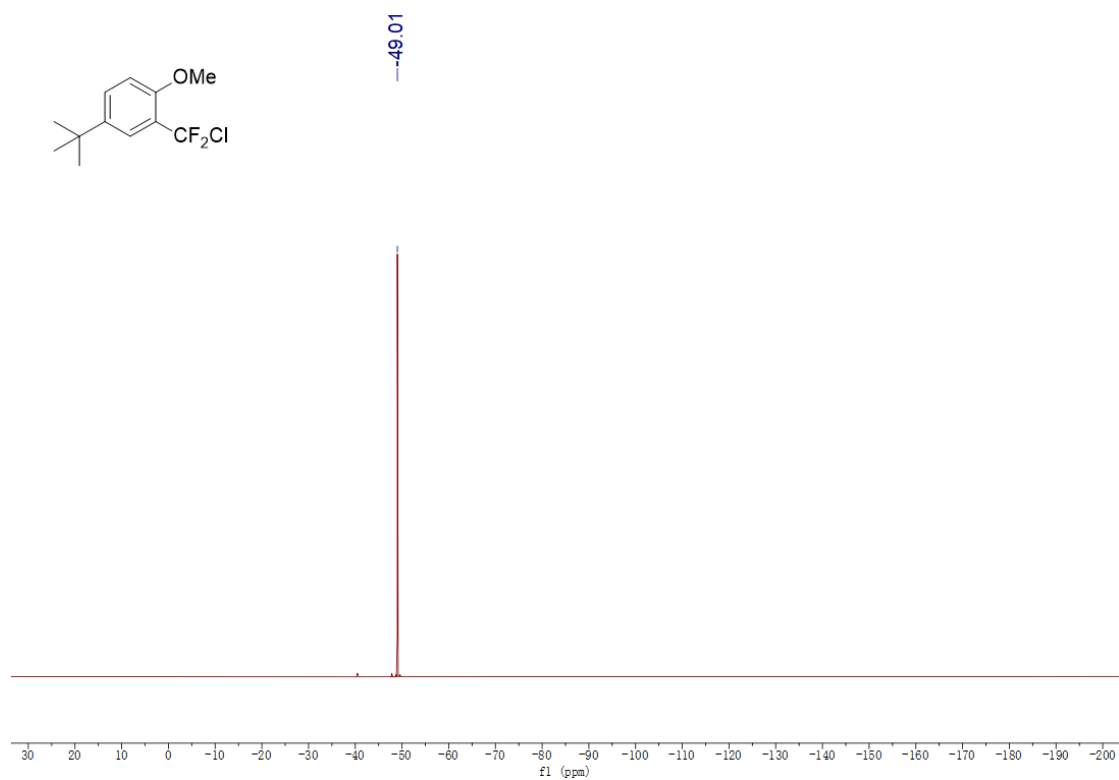

**<sup>1</sup>H NMR spectrum of 2-(chlorodifluoromethyl)-1-methyl-1*H*-indole-3-carbaldehyde 3f**

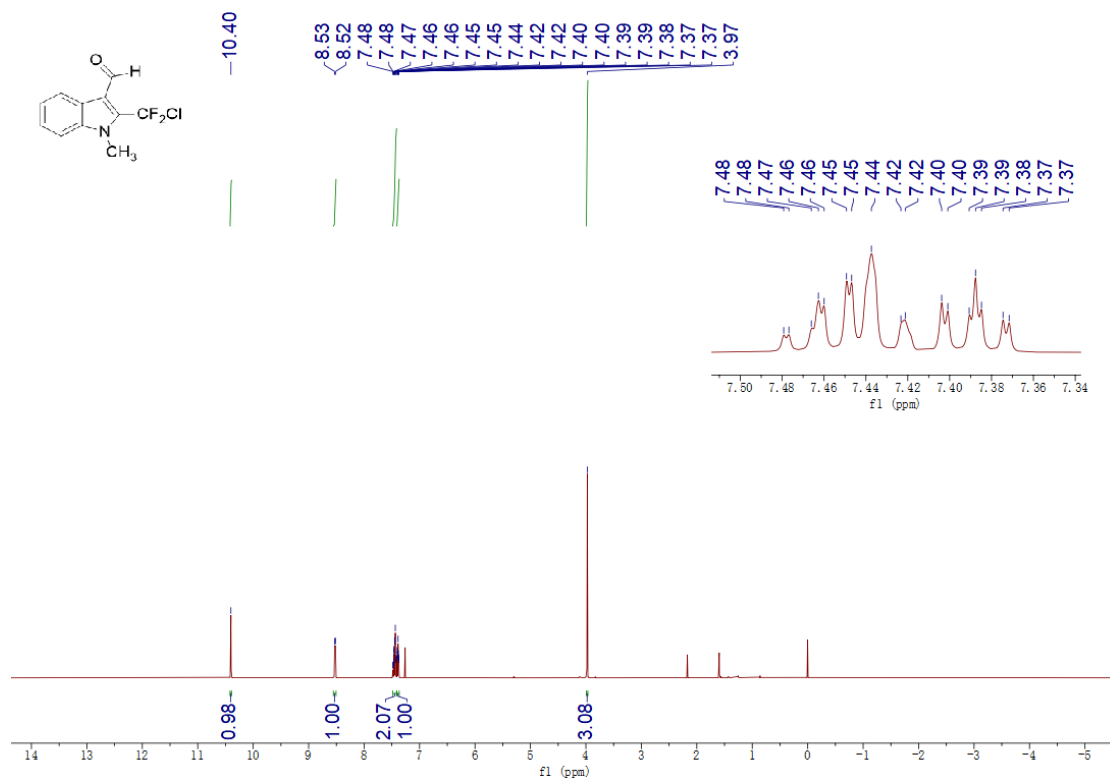

**<sup>13</sup>C NMR spectrum of 2-(chlorodifluoromethyl)-1-methyl-1*H*-indole-3-carbaldehyde 3f**

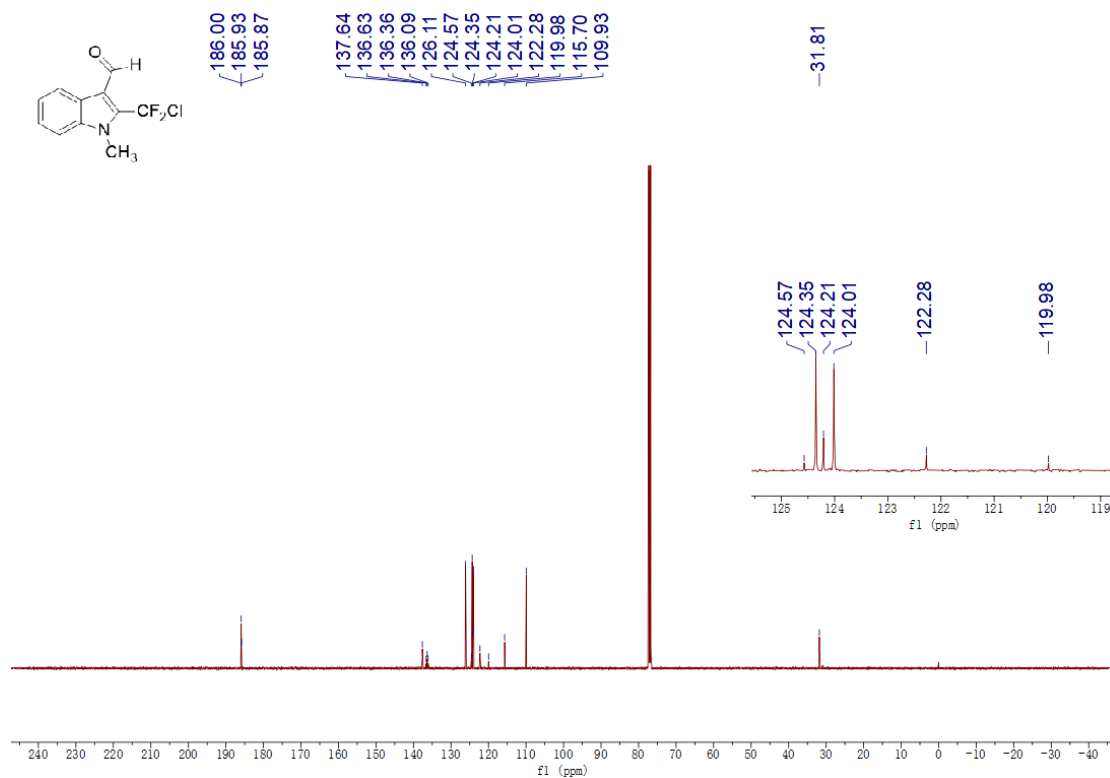

**<sup>19</sup>F NMR spectrum of 2-(chlorodifluoromethyl)-1-methyl-1H-indole-3-carbaldehyde 3f**

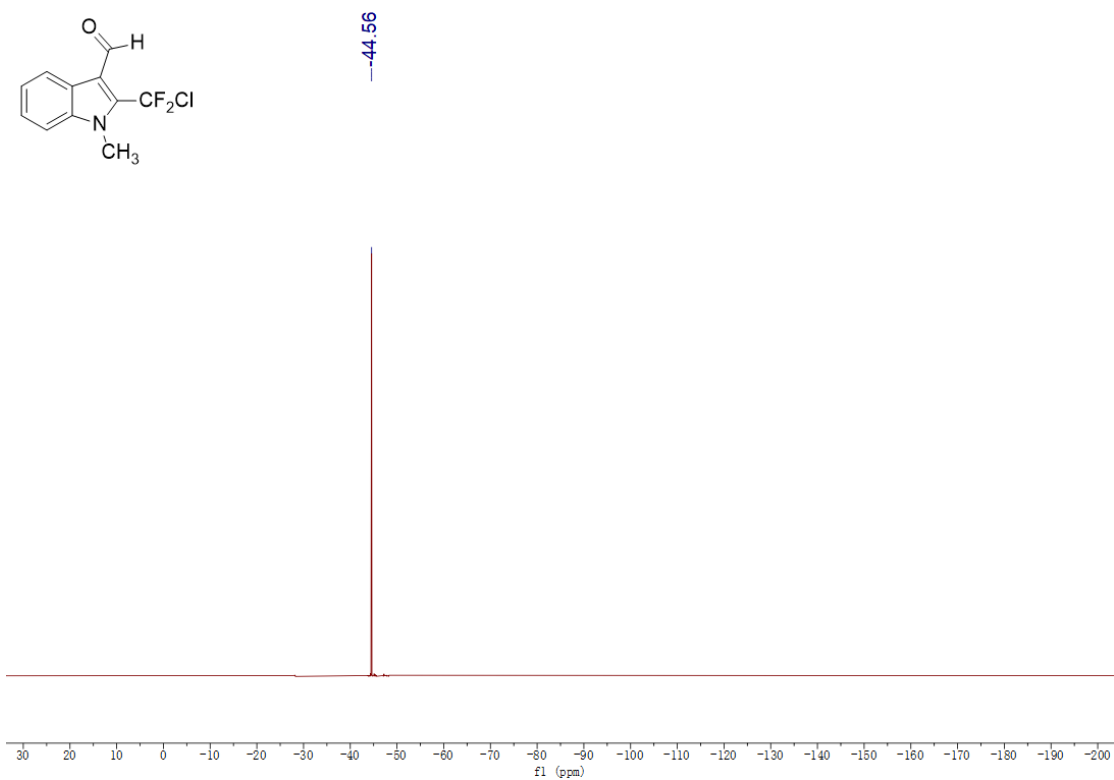

**<sup>1</sup>H NMR spectrum of methyl 2-(chlorodifluoromethyl)-1-methyl-1H-indole-3-carboxylate 3g**

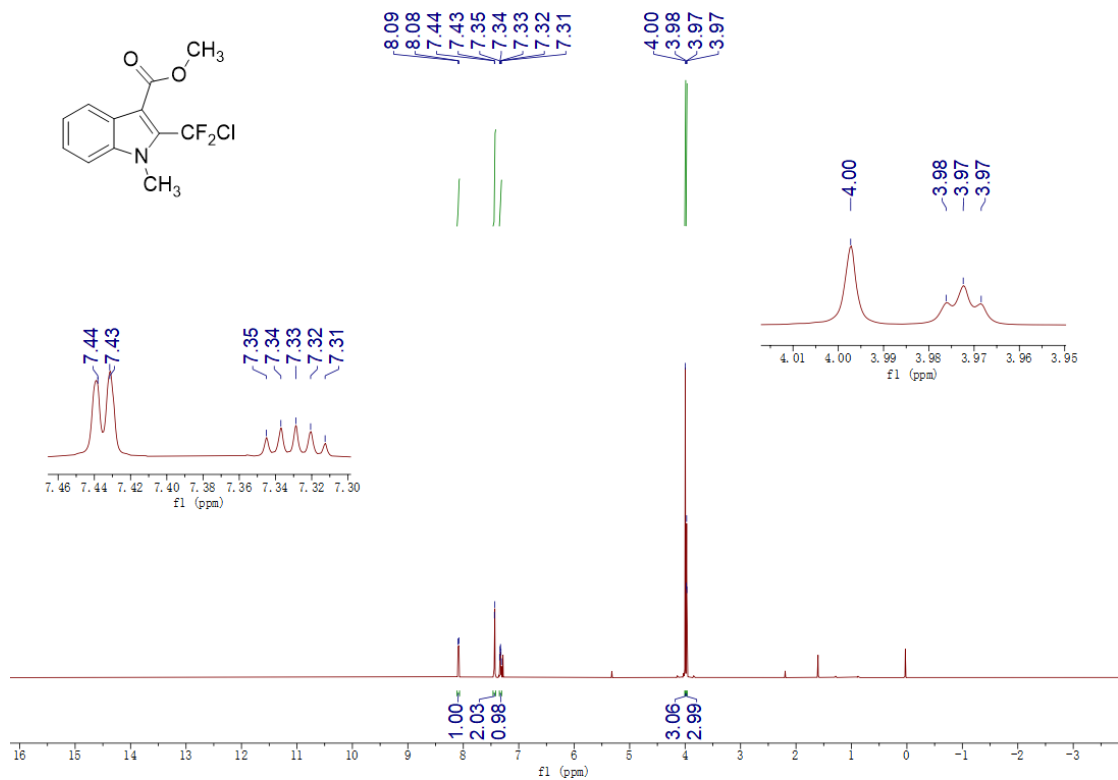

**<sup>13</sup>C NMR spectrum of methyl 2-(chlorodifluoromethyl)-1-methyl-*1H*-indole-3-carboxylate 3g**

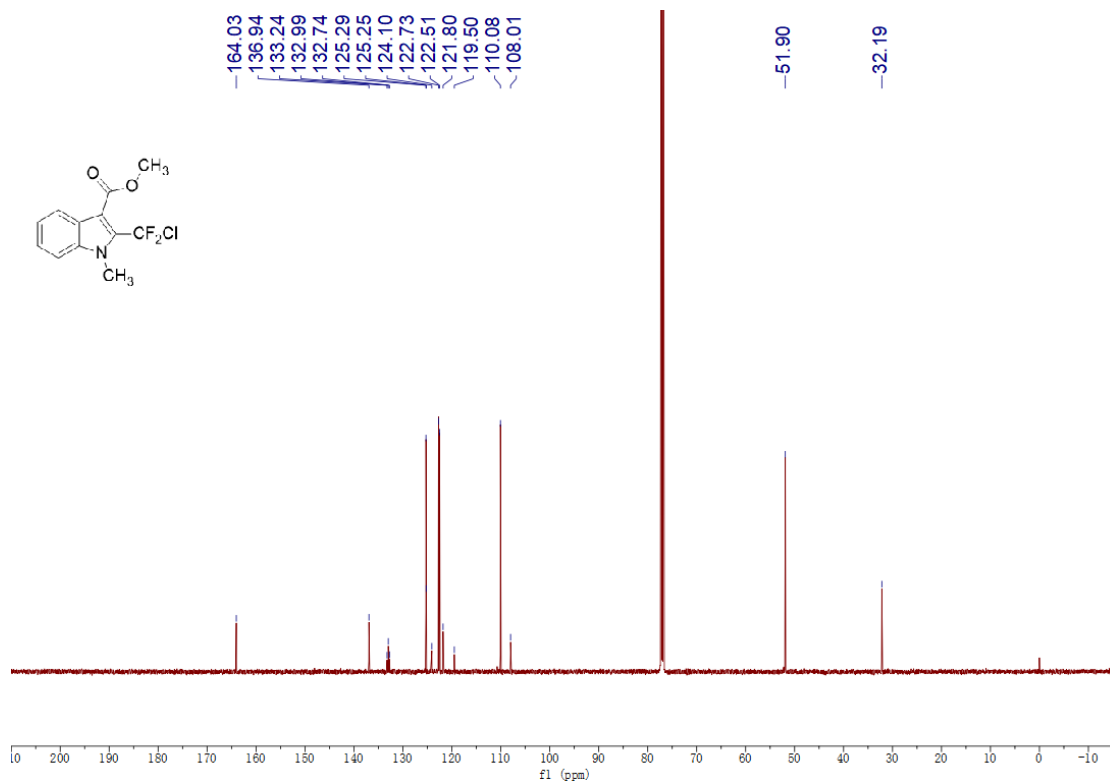

**<sup>19</sup>F NMR spectrum of methyl 2-(chlorodifluoromethyl)-1-methyl-*1H*-indole-3-carboxylate 3g**

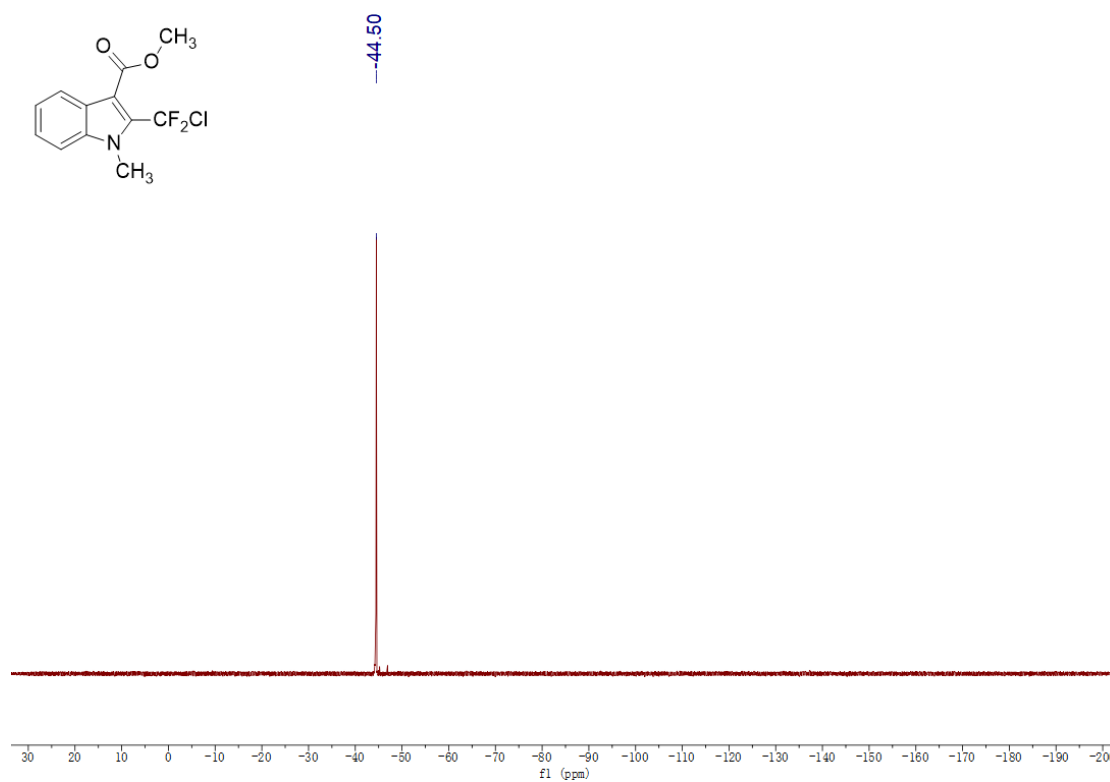

**<sup>1</sup>H NMR spectrum of 5-bromo-2-(chlorodifluoromethyl)-1-methyl-*1H*-indole-3-carbaldehyde 3h**

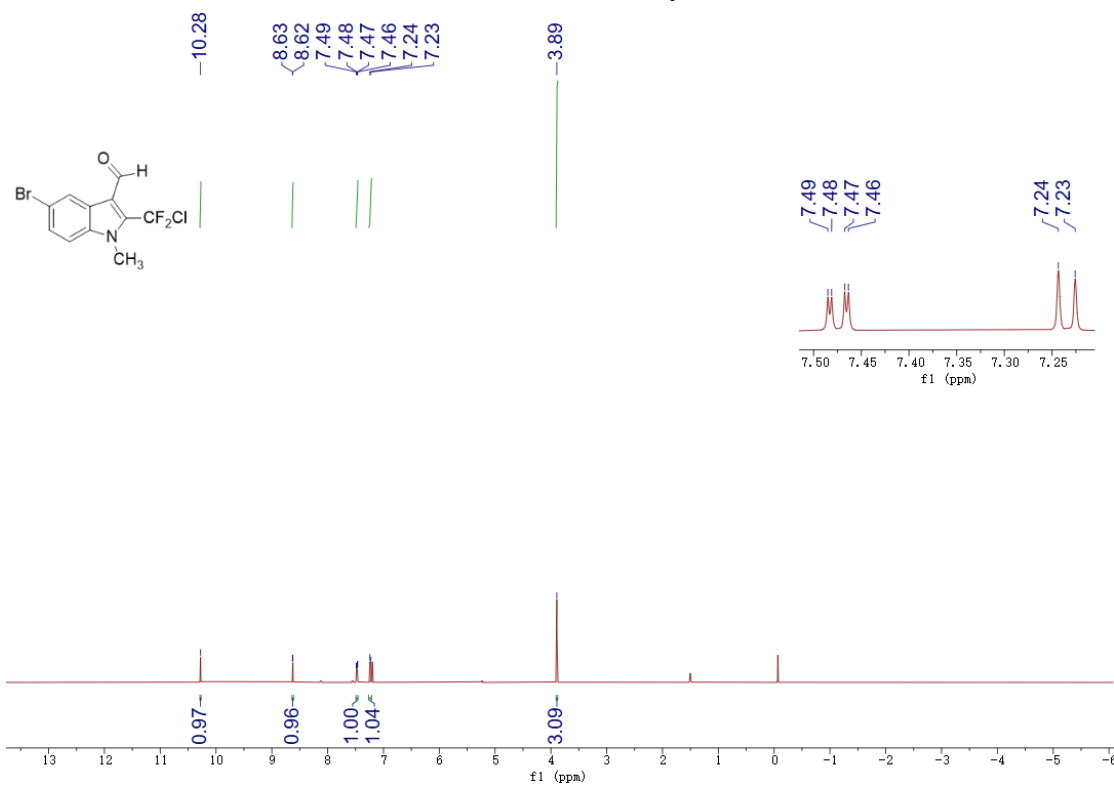

**<sup>13</sup>C NMR spectrum of 5-bromo-2-(chlorodifluoromethyl)-1-methyl-*1H*-indole-3-carbaldehyde 3h**

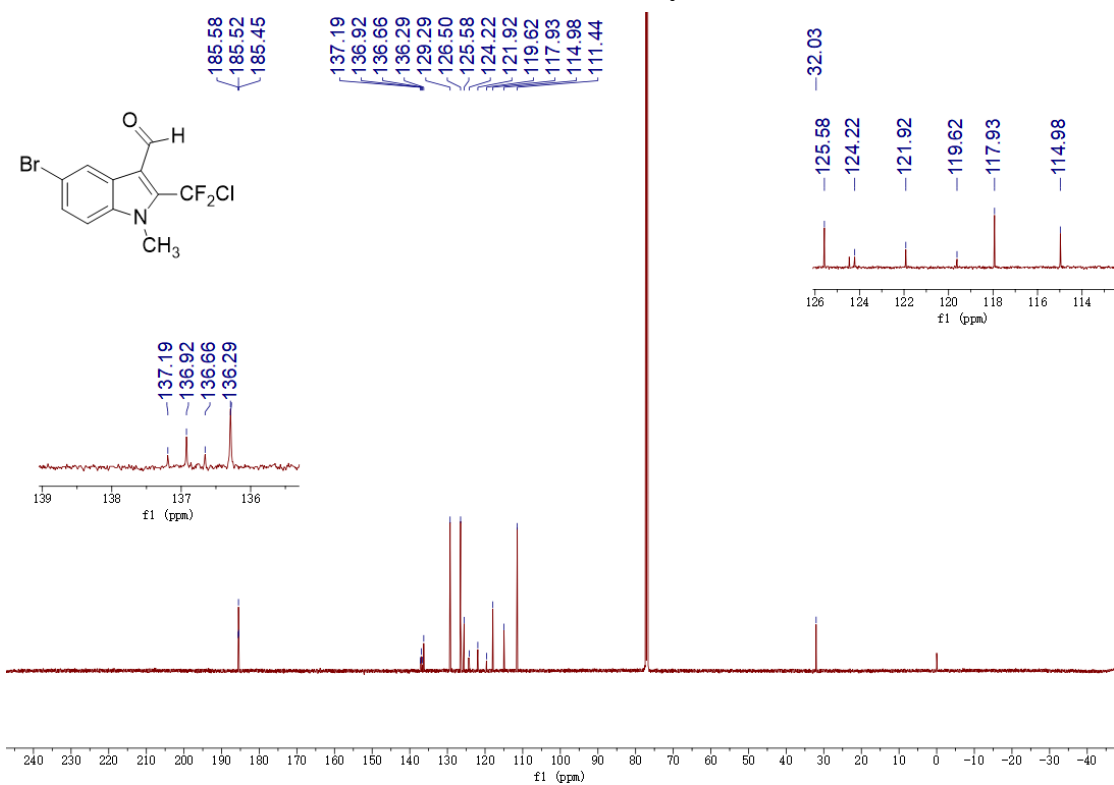

**<sup>19</sup>F NMR spectrum of 5-bromo-2-(chlorodifluoromethyl)-1-methyl-1H-indole-3-carbaldehyde 3h**

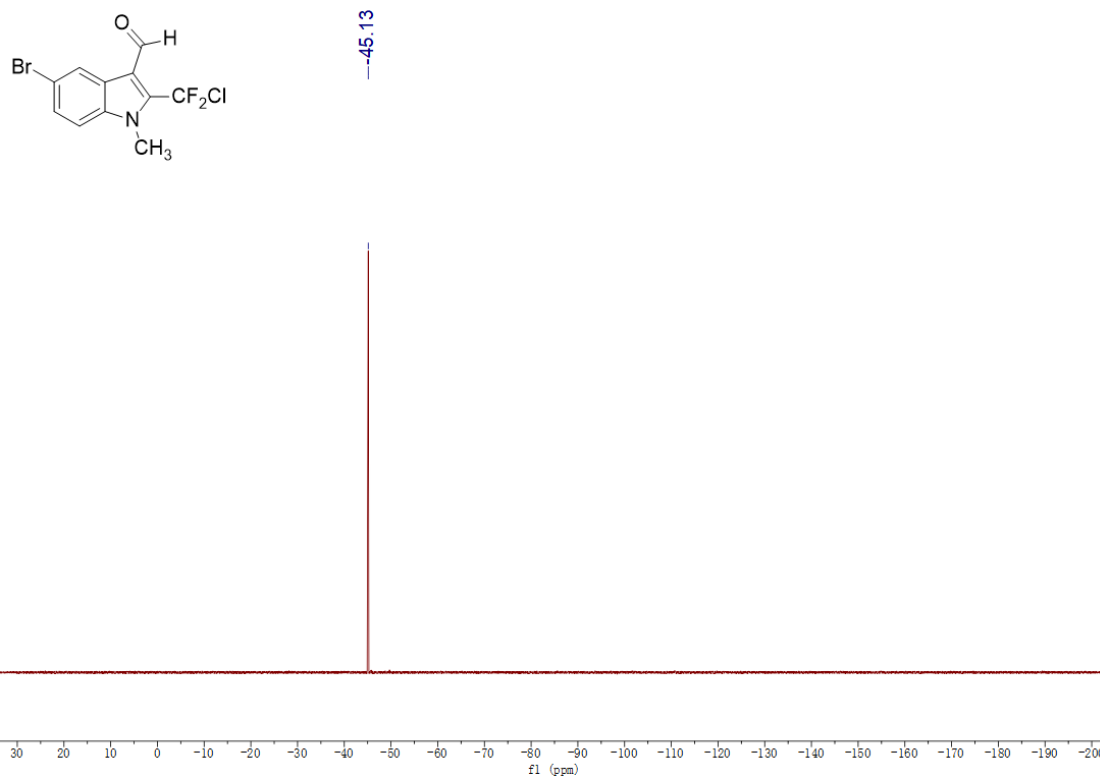

**<sup>1</sup>H NMR spectrum of tert-butyl 2-(chlorodifluoromethyl)-6-fluoro-1H-indole-1-carboxylate 3i**

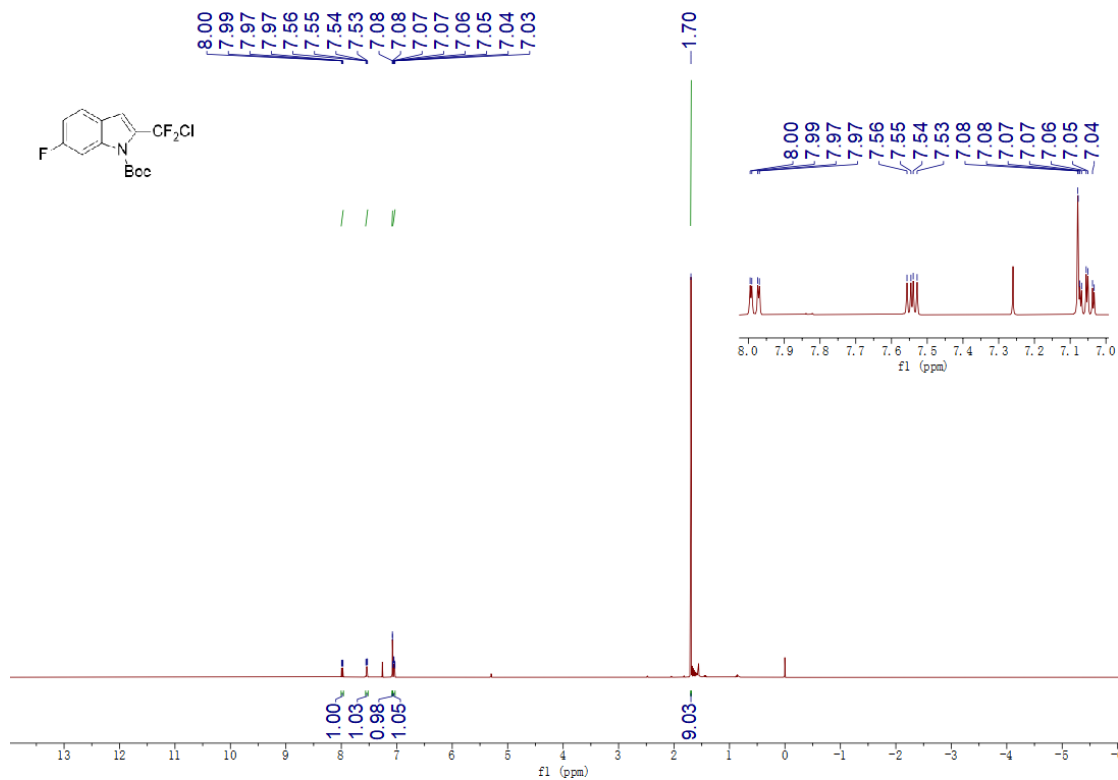



**<sup>13</sup>C NMR spectrum of *tert*-butyl 2-(chlorodifluoromethyl)-6-fluoro-  
-1*H*-indole-1-carboxylate 3i**

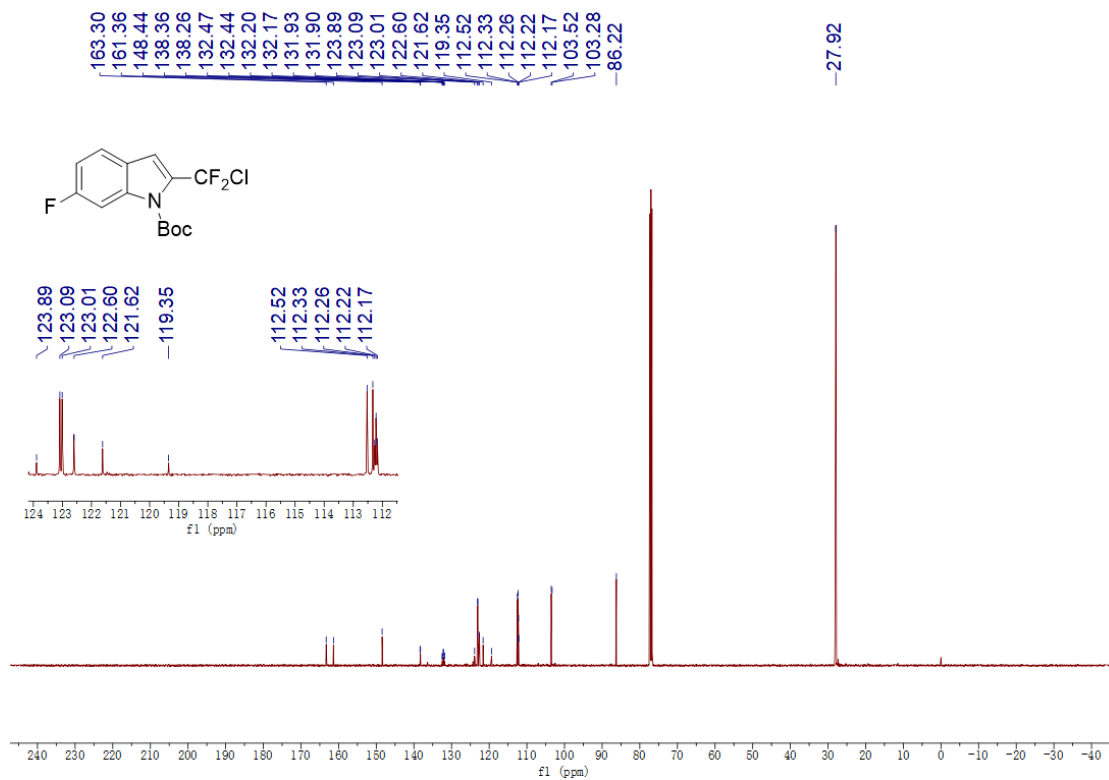

**<sup>19</sup>F NMR spectrum of *tert*-butyl 2-(chlorodifluoromethyl)-6-fluoro-  
-1*H*-indole-1-carboxylate 3i**

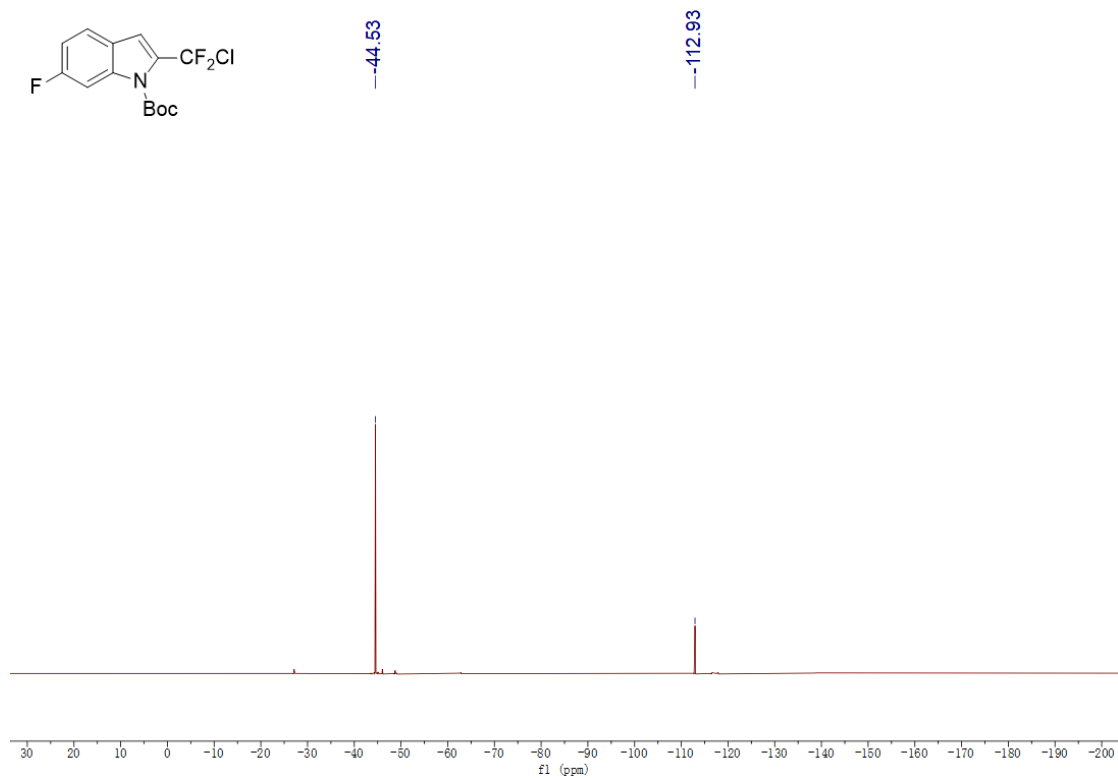

**<sup>1</sup>H NMR spectrum of ethyl 5-(chlorodifluoromethyl)-1-methyl-  
-1H-pyrrole-2-carboxylate 3j**

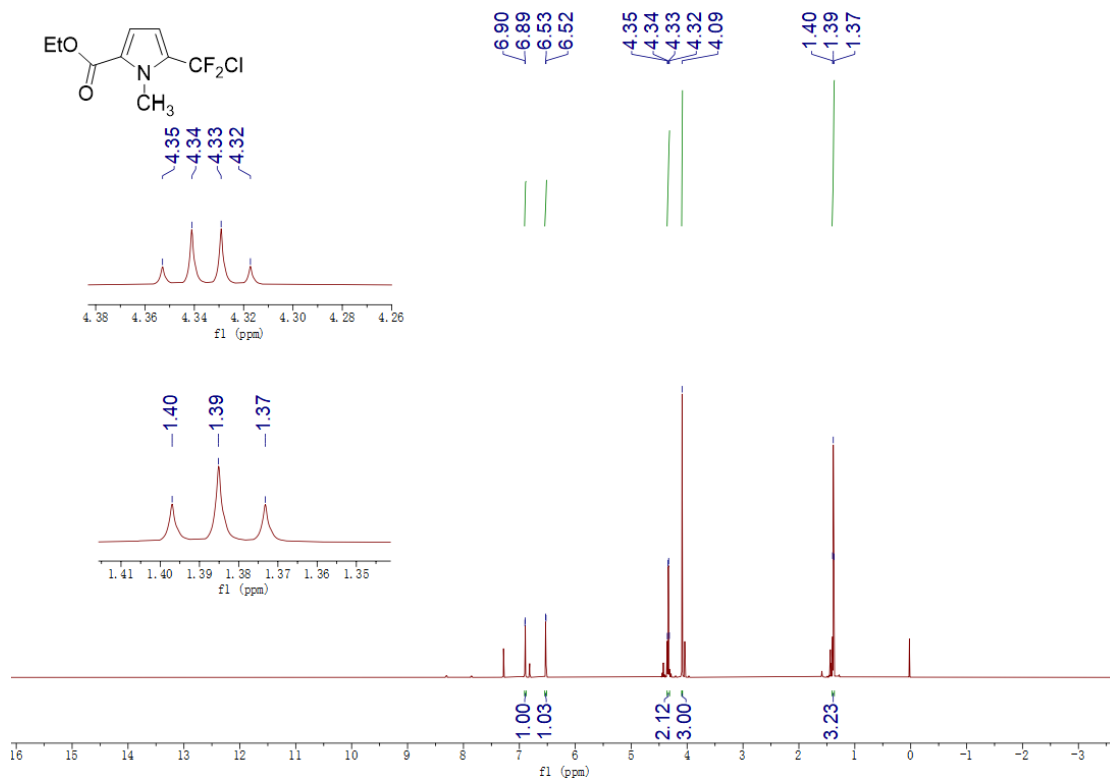

**<sup>13</sup>C NMR spectrum of ethyl 5-(chlorodifluoromethyl)-1-methyl-  
-1H-pyrrole-2-carboxylate 3j**

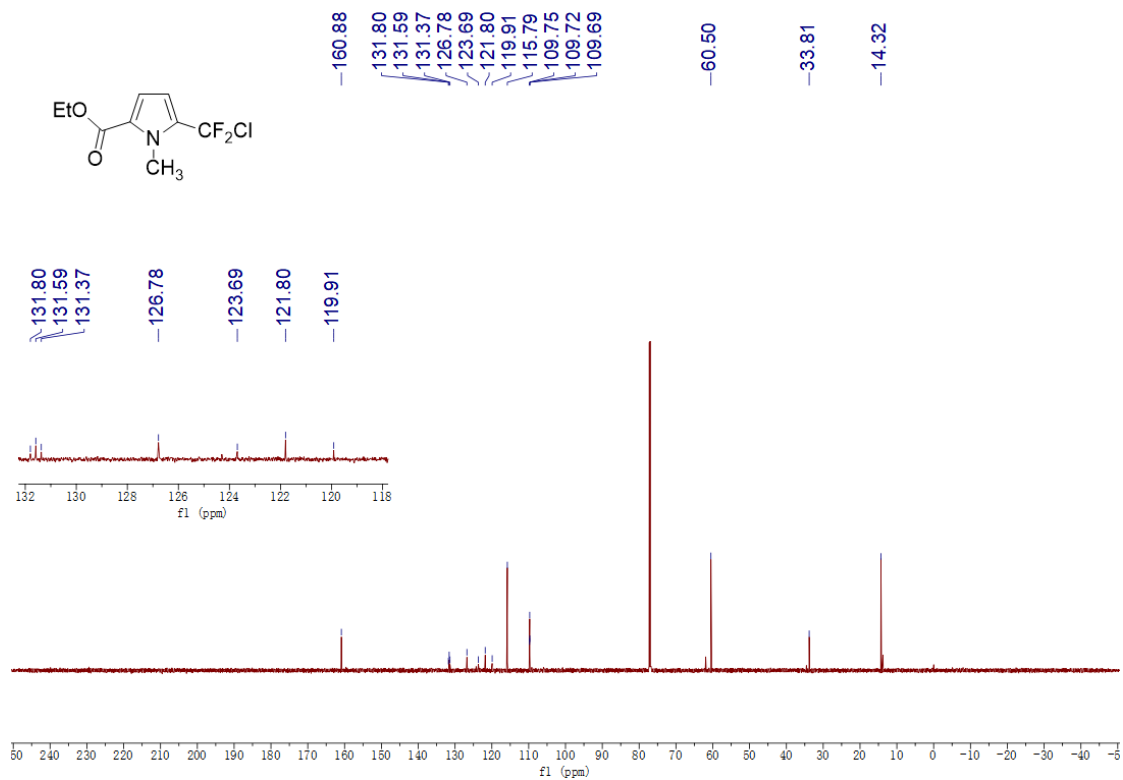

**<sup>19</sup>F NMR spectrum of ethyl 5-(chlorodifluoromethyl)-1-methyl-1H-pyrrole-2-carboxylate 3j**

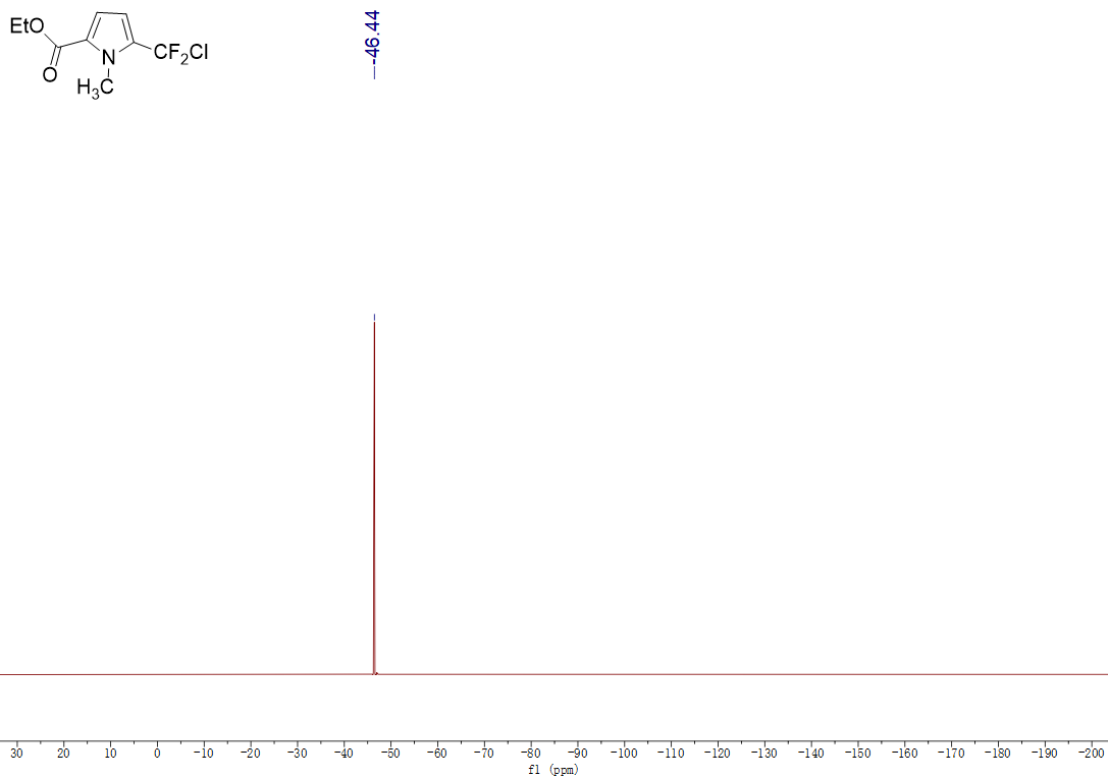

**<sup>1</sup>H NMR spectrum of 1-(5-(chlorodifluoromethyl)-1-methyl-1H-pyrrol-2-yl)ethan-1-one 3k**

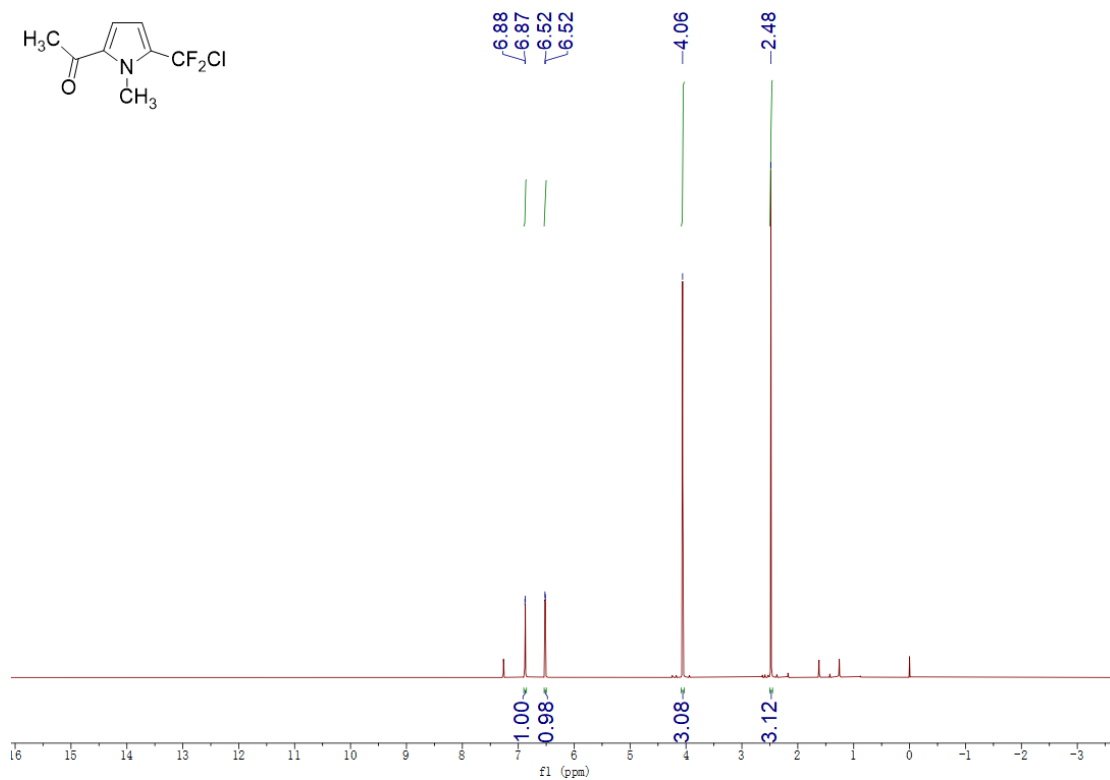

**<sup>13</sup>C NMR spectrum of 1-(5-(chlorodifluoromethyl)-1-methyl-1H-pyrrol-2-yl)ethan-1-one 3k**

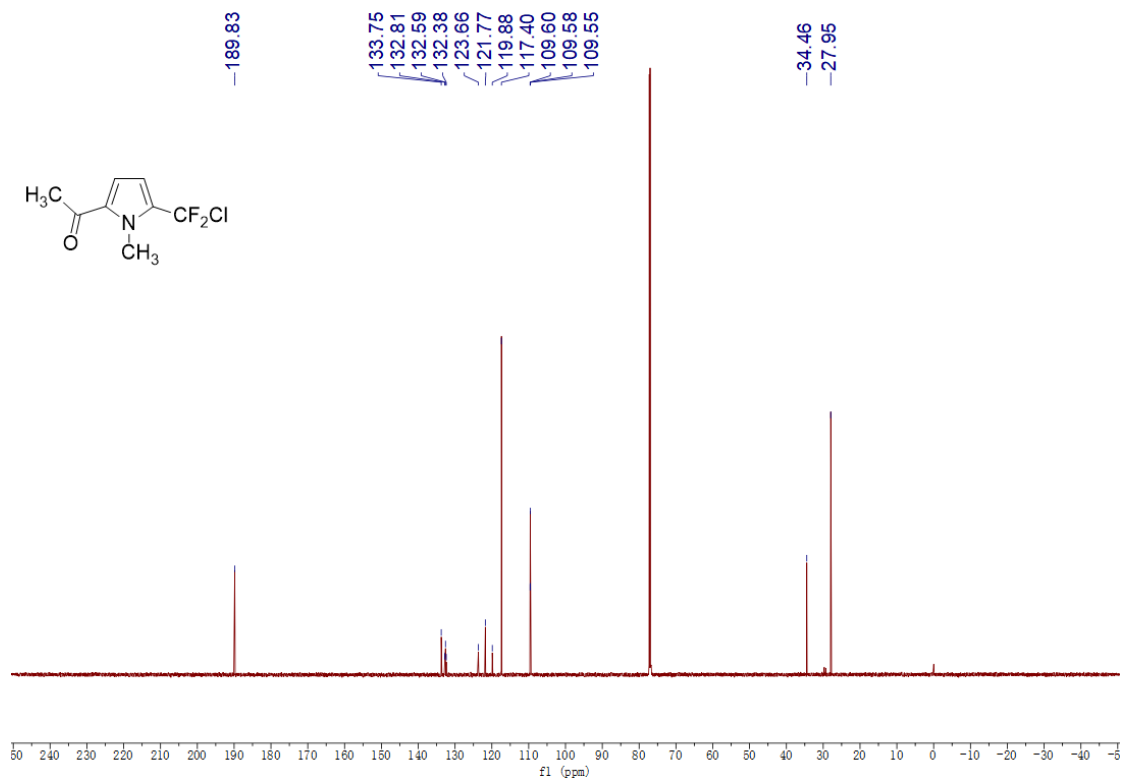

**<sup>19</sup>F NMR spectrum of 1-(5-(chlorodifluoromethyl)-1-methyl-1H-pyrrol-2-yl)ethan-1-one 3k**

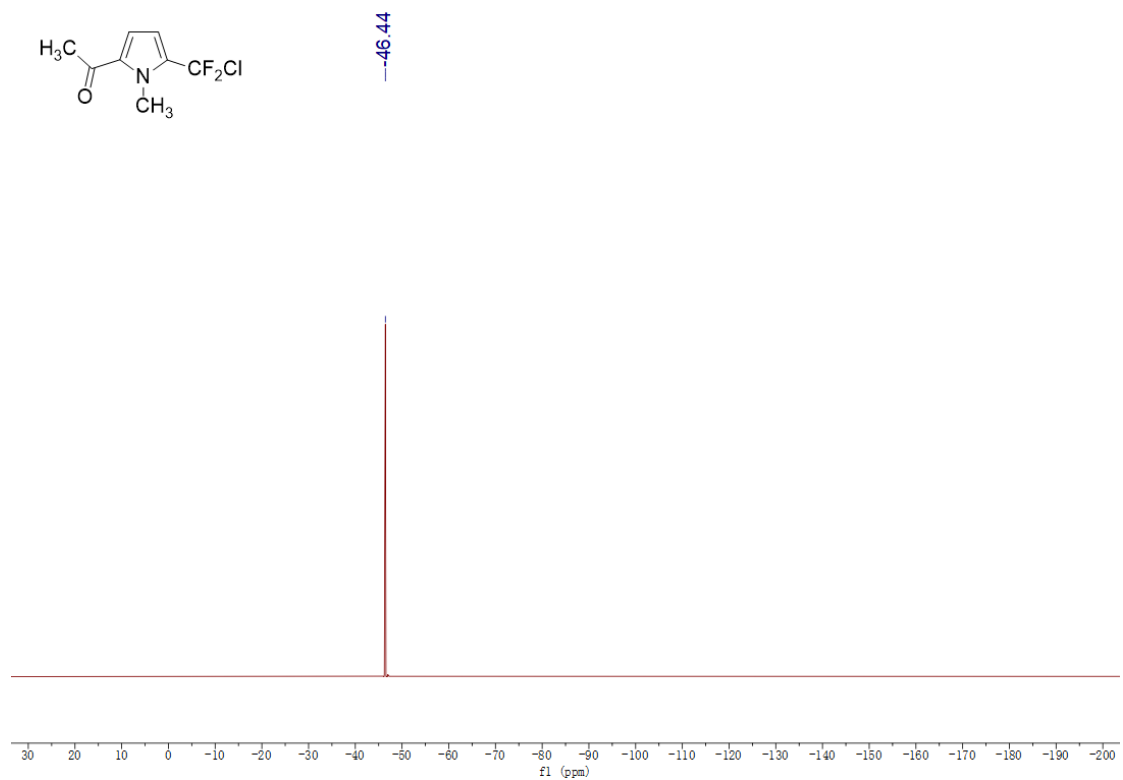

**<sup>1</sup>H NMR spectrum of 5-(chlorodifluoromethyl)-1-methyl-  
-1H-pyrrole-2-carbaldehyde 3I**

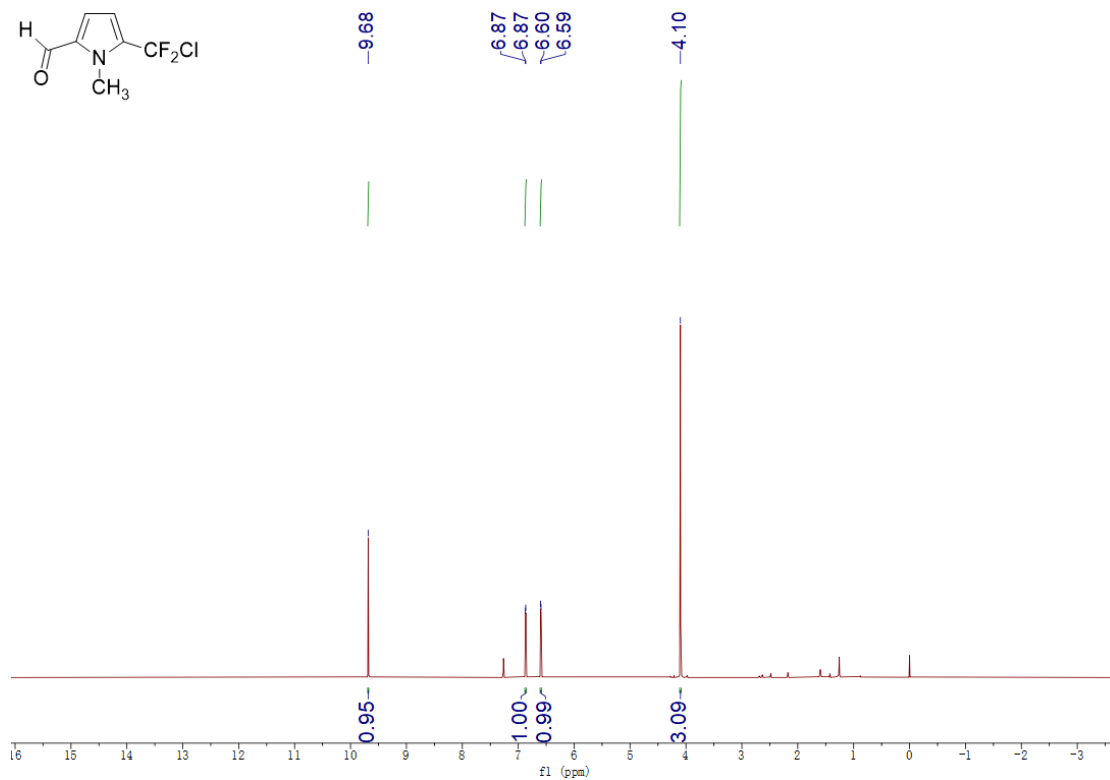

**<sup>13</sup>C NMR spectrum of 5-(chlorodifluoromethyl)-1-methyl-  
-1H-pyrrole-2-carbaldehyde 3I**

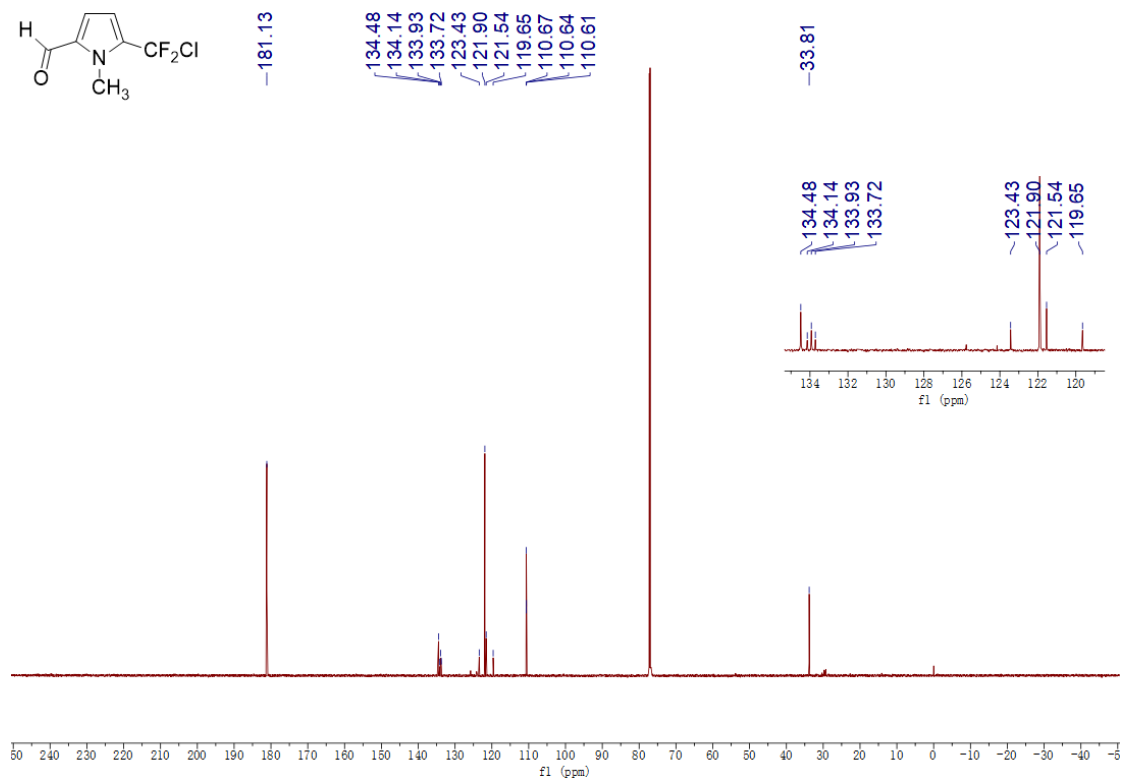

**<sup>19</sup>F NMR spectrum of 5-(chlorodifluoromethyl)-1-methyl-1H-pyrrole-2-carbaldehyde 3l**

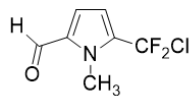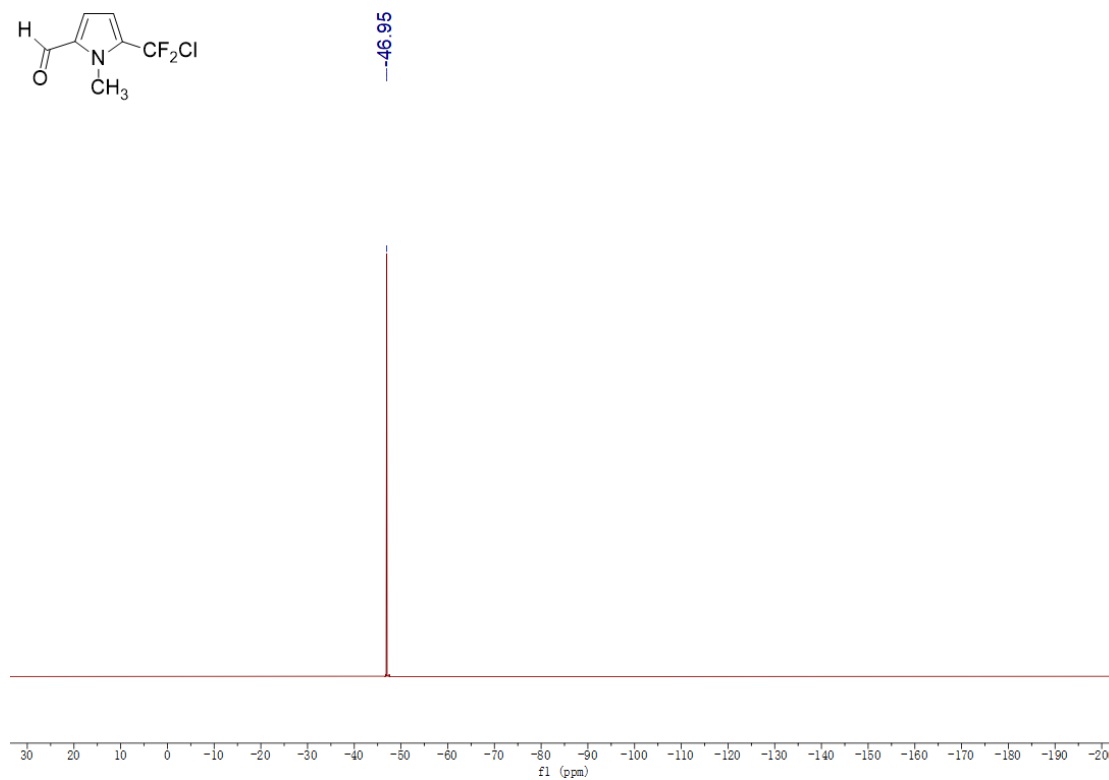

**<sup>1</sup>H NMR spectrum of 8-(difluoro(trimethylsilyl)methyl)-1-hexyl-3,7-dimethyl-3,7-dihydro-1H-purine-2,6-dione 4**

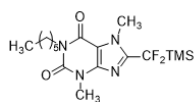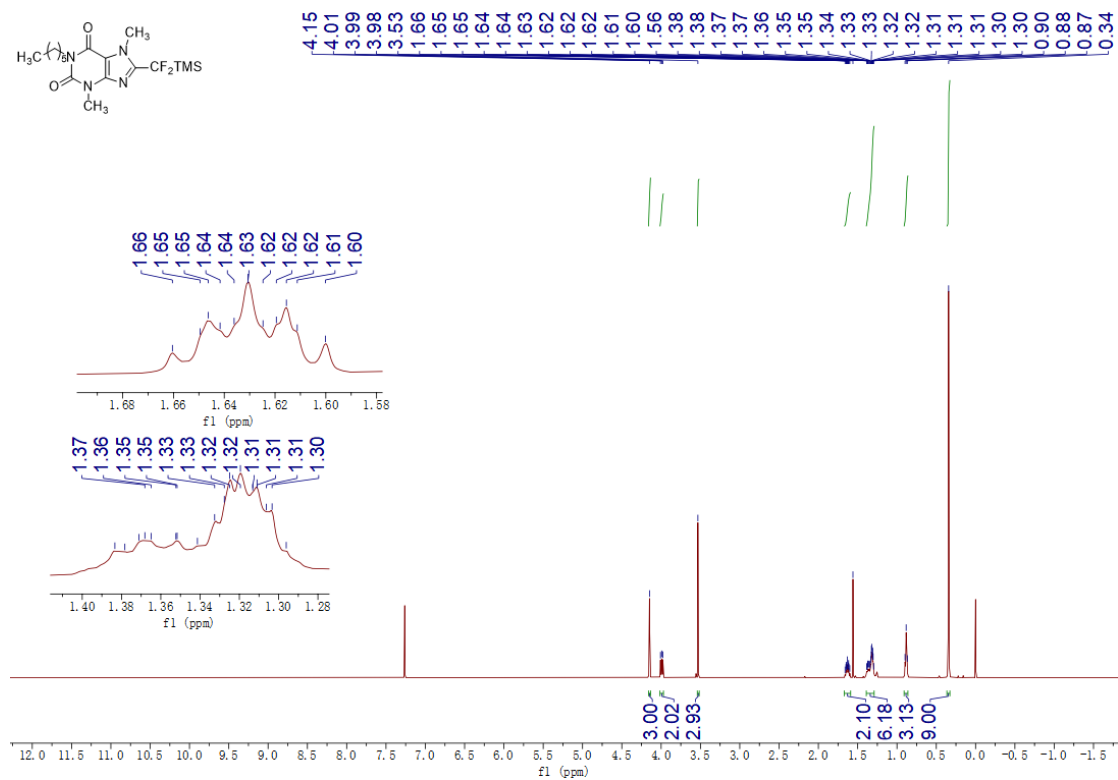

**<sup>13</sup>C NMR spectrum of 8-(difluoro(trimethylsilyl)methyl)-1-hexyl-3,7-dimethyl-3,7-dihydro-1H-purine-2,6-dione 4**

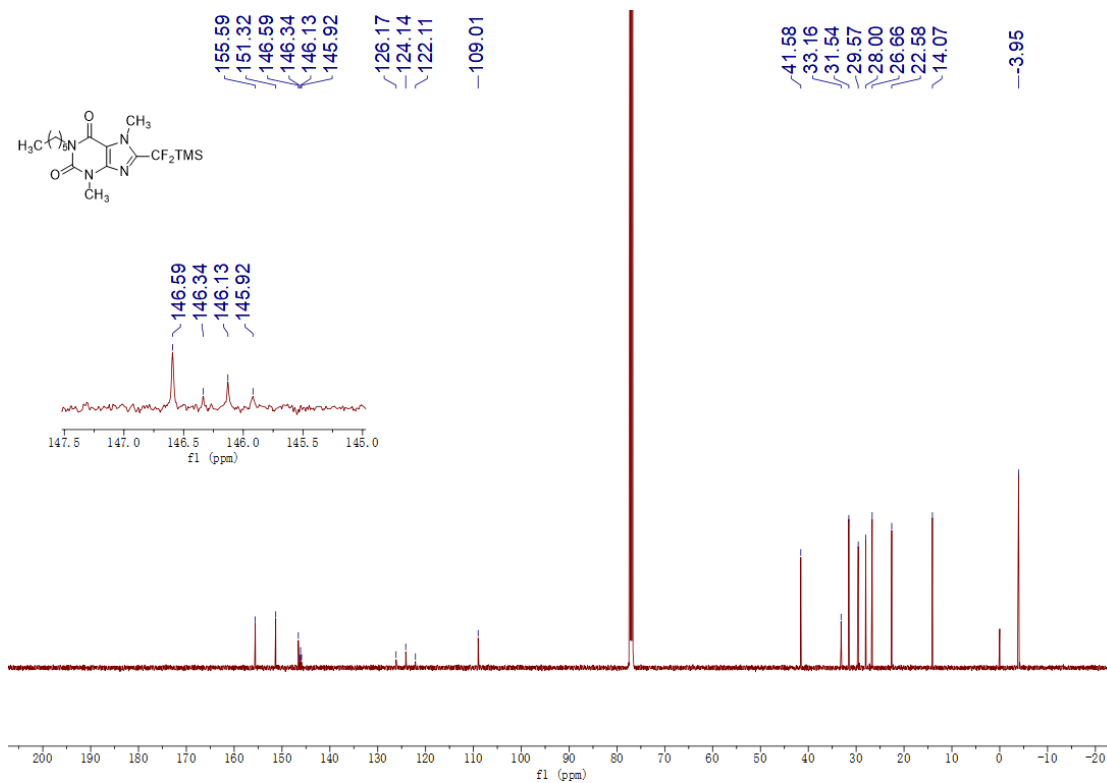

**<sup>19</sup>F NMR spectrum of 8-(difluoro(trimethylsilyl)methyl)-1-hexyl-3,7-dimethyl-3,7-dihydro-1H-purine-2,6-dione 4**

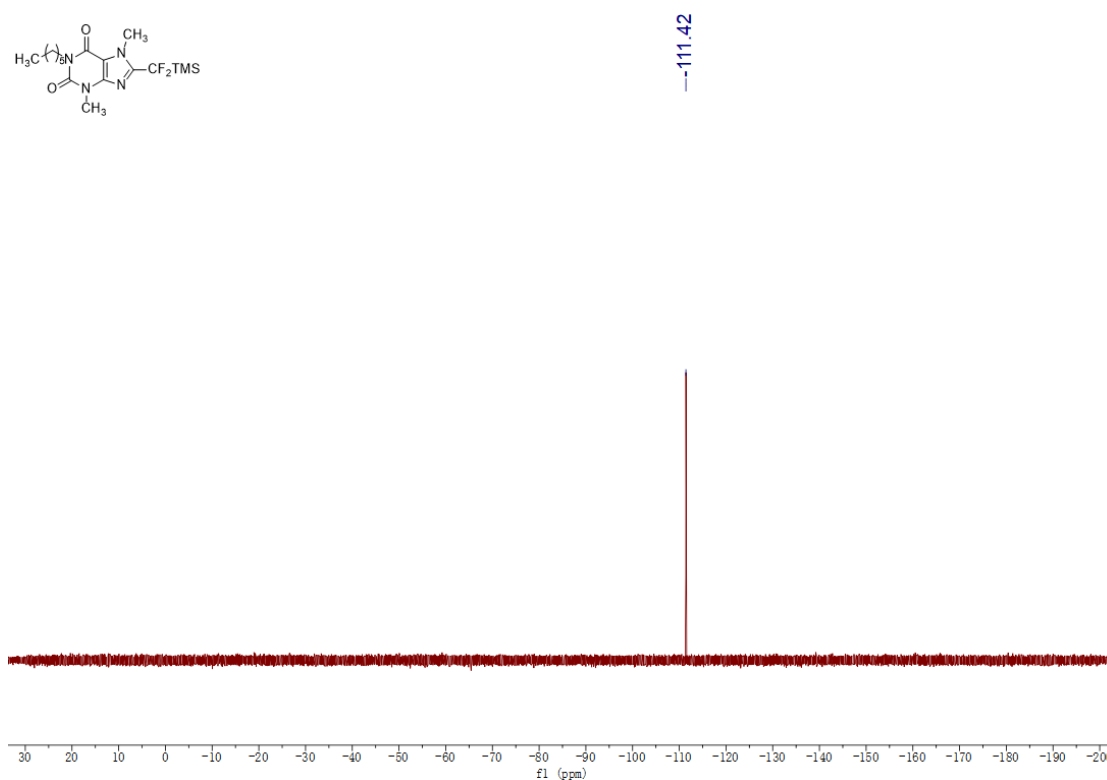

**<sup>1</sup>H NMR spectrum of methyl 2-(chlorodifluoromethyl)-6-methyl-1-oxo-2,3-dihydro-1H-indene-2-carboxylate 5a**

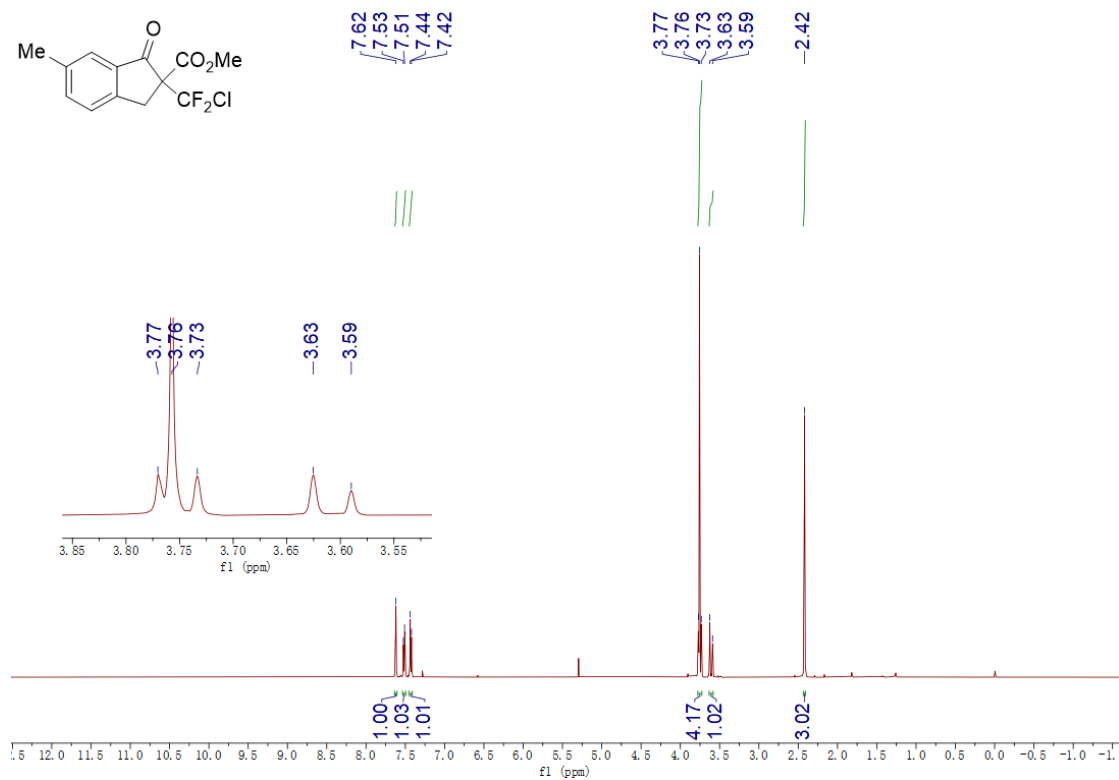

**<sup>13</sup>C NMR spectrum of methyl 2-(chlorodifluoromethyl)-6-methyl-1-oxo-2,3-dihydro-1H-indene-2-carboxylate 5a**

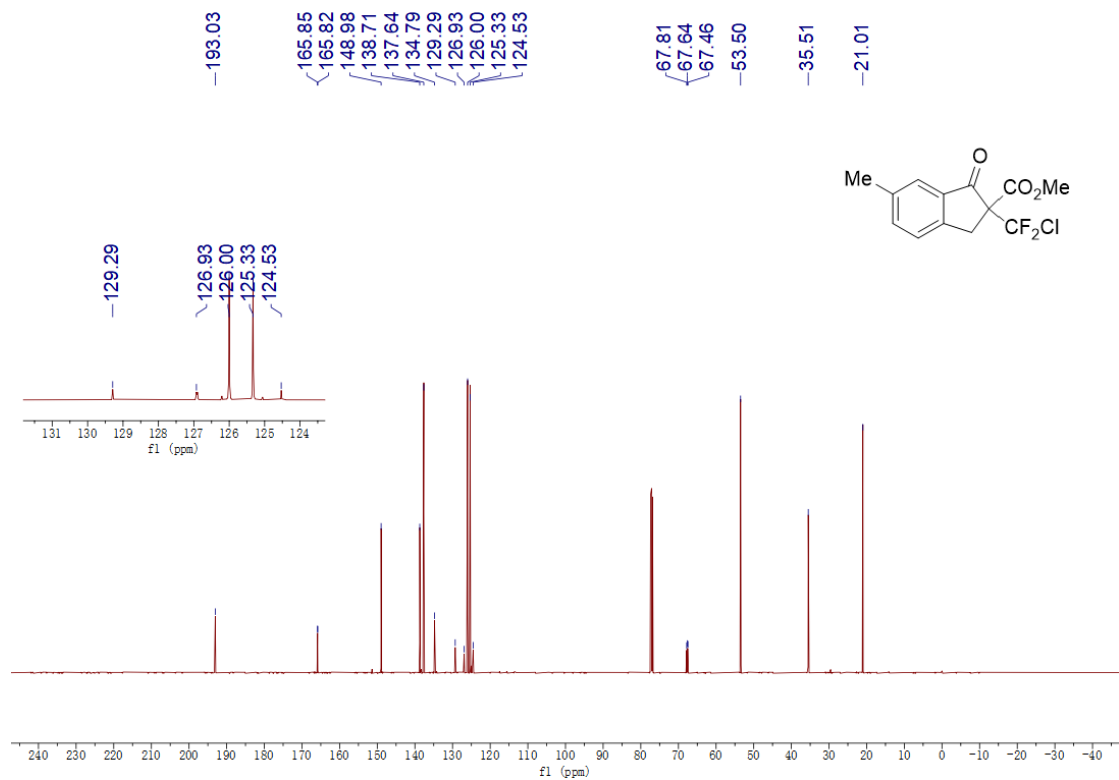



**$^{19}\text{F}$  NMR spectrum of methyl 2-(chlorodifluoromethyl)-6-methyl-1-oxo-2,3-dihydro-1*H*-indene-2-carboxylate 5a**

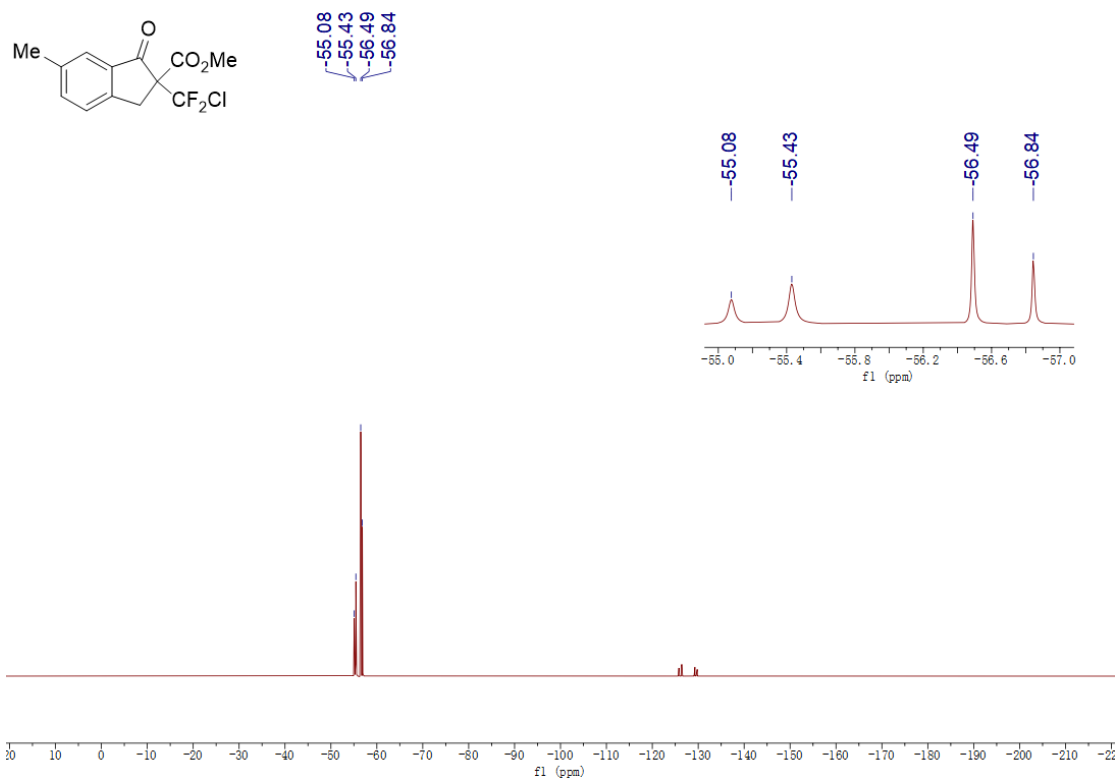

**$^1\text{H}$  NMR spectrum of methyl 2-(chlorodifluoromethyl)-1-oxo-2,3-dihydro-1*H*-indene-2-carboxylate 5b**

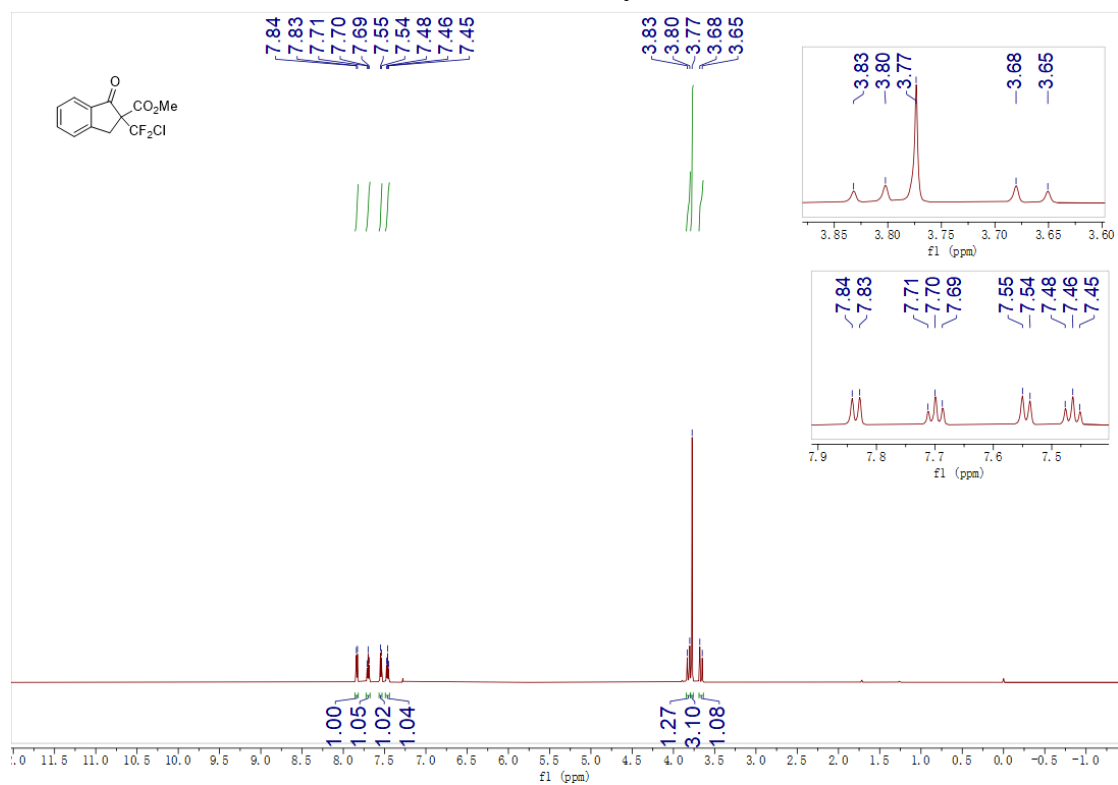

**<sup>13</sup>C NMR spectrum of methyl 2-(chlorodifluoromethyl)-1-oxo-2,3-dihydro-1H-indene-2-carboxylate 5b**

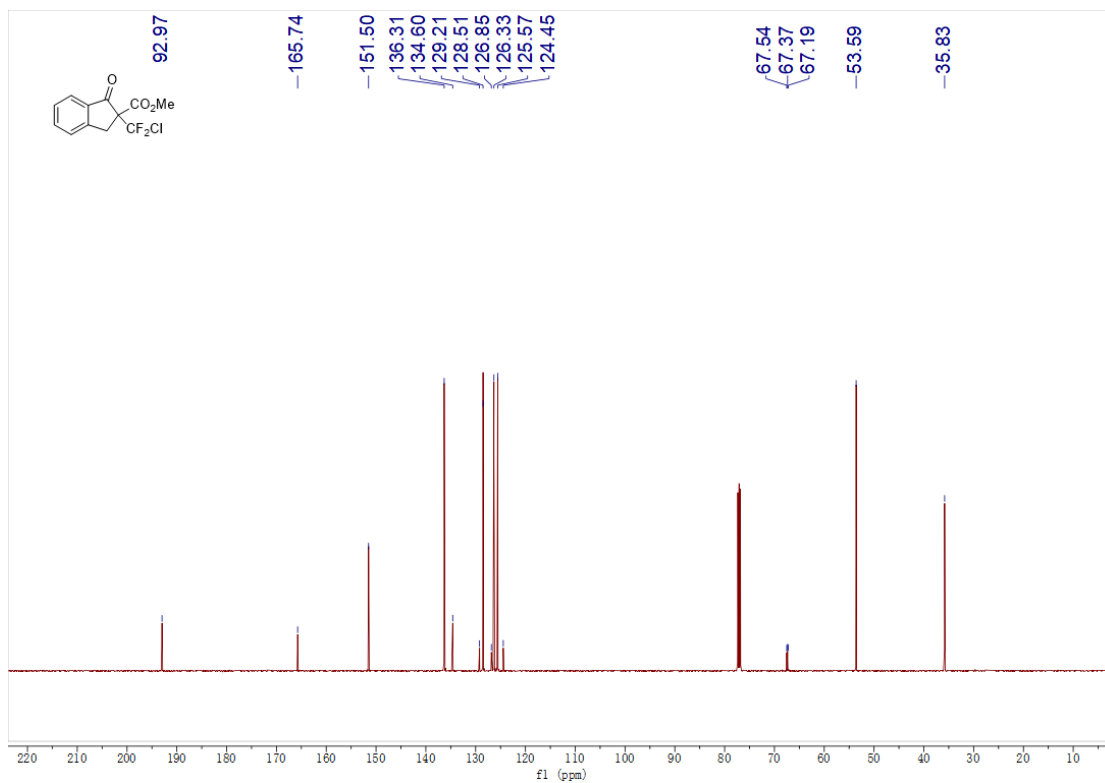

**<sup>19</sup>F NMR spectrum of methyl 2-(chlorodifluoromethyl)-1-oxo-2,3-dihydro-1H-indene-2-carboxylate 5b**

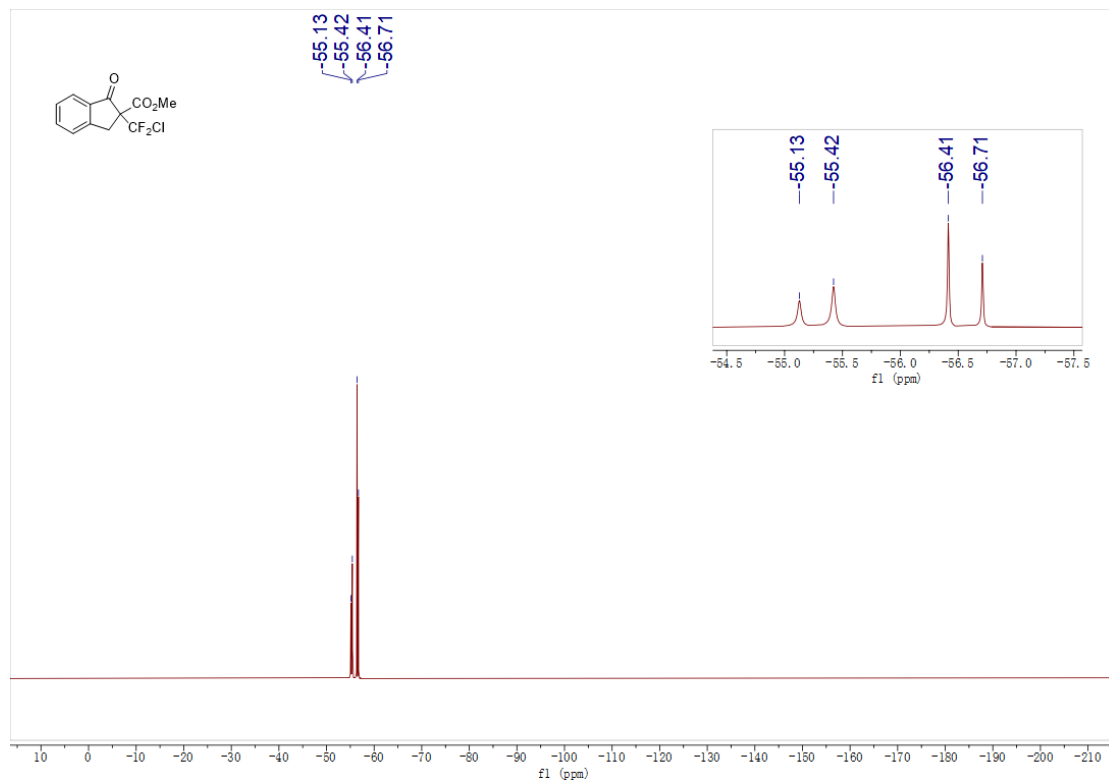

**<sup>1</sup>H NMR spectrum of methyl 2-(chlorodifluoromethyl)-6-fluoro-1-oxo-2,3-dihydro-1H-indene-2-carboxylate 5c**

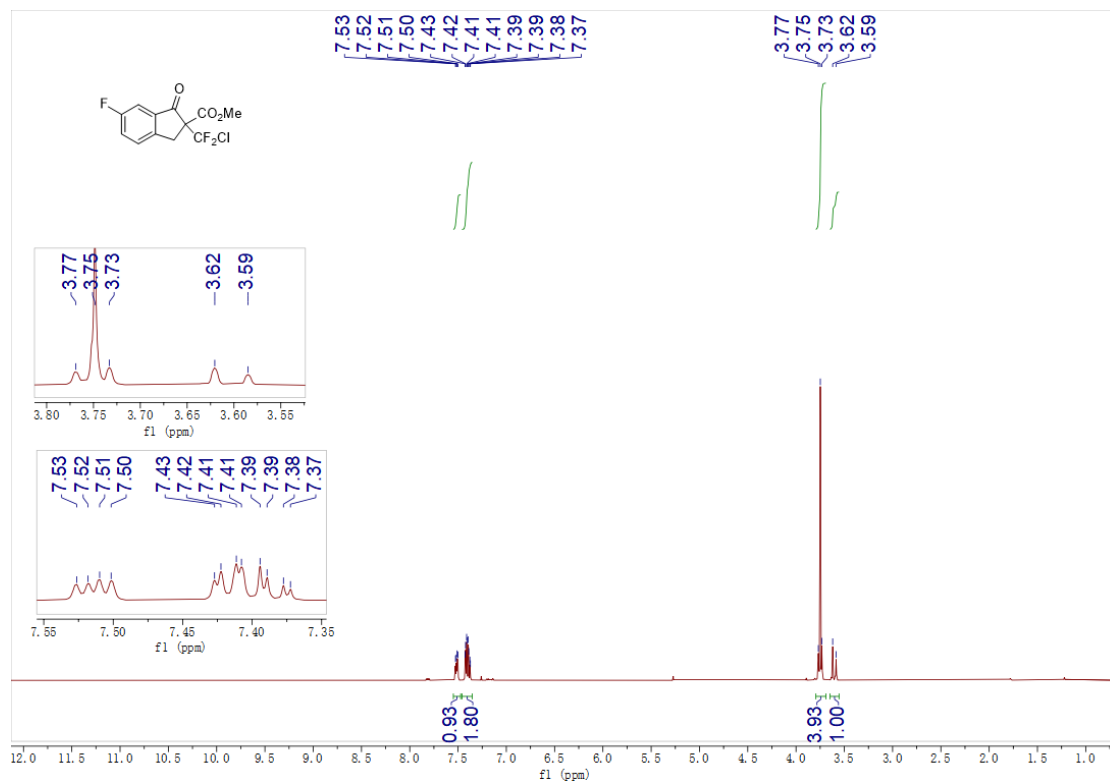

**<sup>13</sup>C NMR spectrum of methyl 2-(chlorodifluoromethyl)-6-fluoro-1-oxo-2,3-dihydro-1H-indene-2-carboxylate 5c**

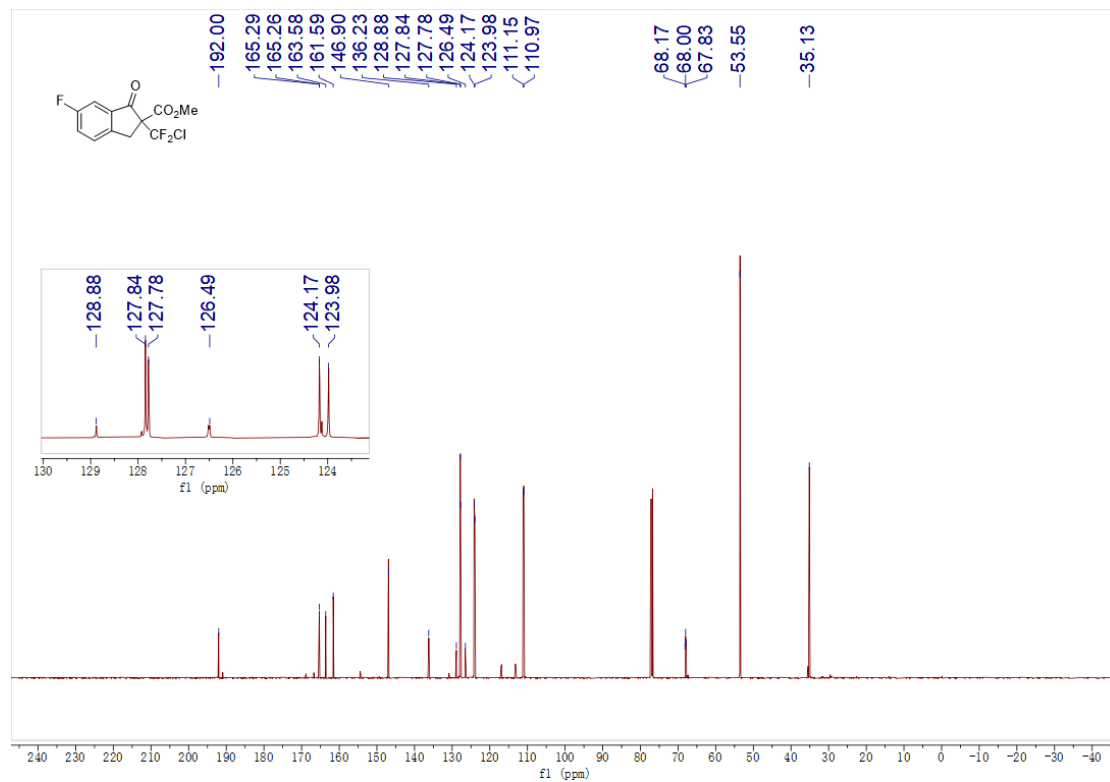

**$^{19}\text{F}$  NMR spectrum of methyl 2-(chlorodifluoromethyl)-6-fluoro-1-oxo-2,3-dihydro-1*H*-indene-2-carboxylate **5c****

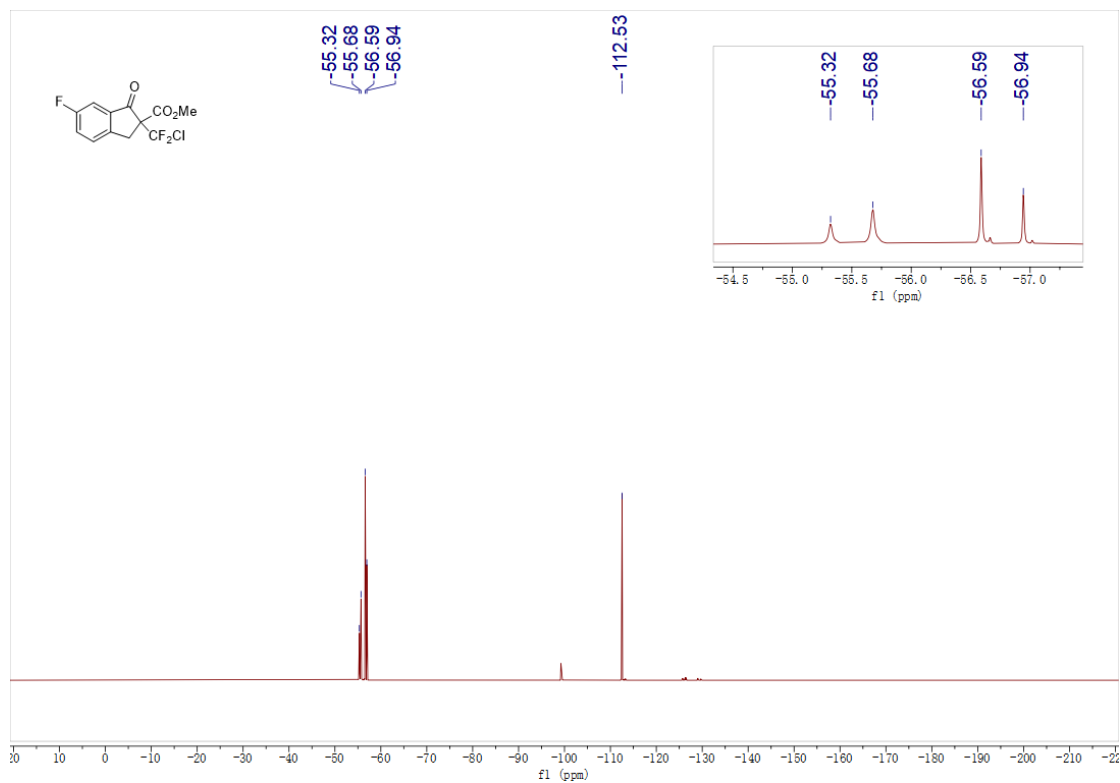

**$^1\text{H}$  NMR spectrum of methyl 6-bromo-2-(chlorodifluoromethyl)-1-oxo-2,3-dihydro-1*H*-indene-2-carboxylate **5d****

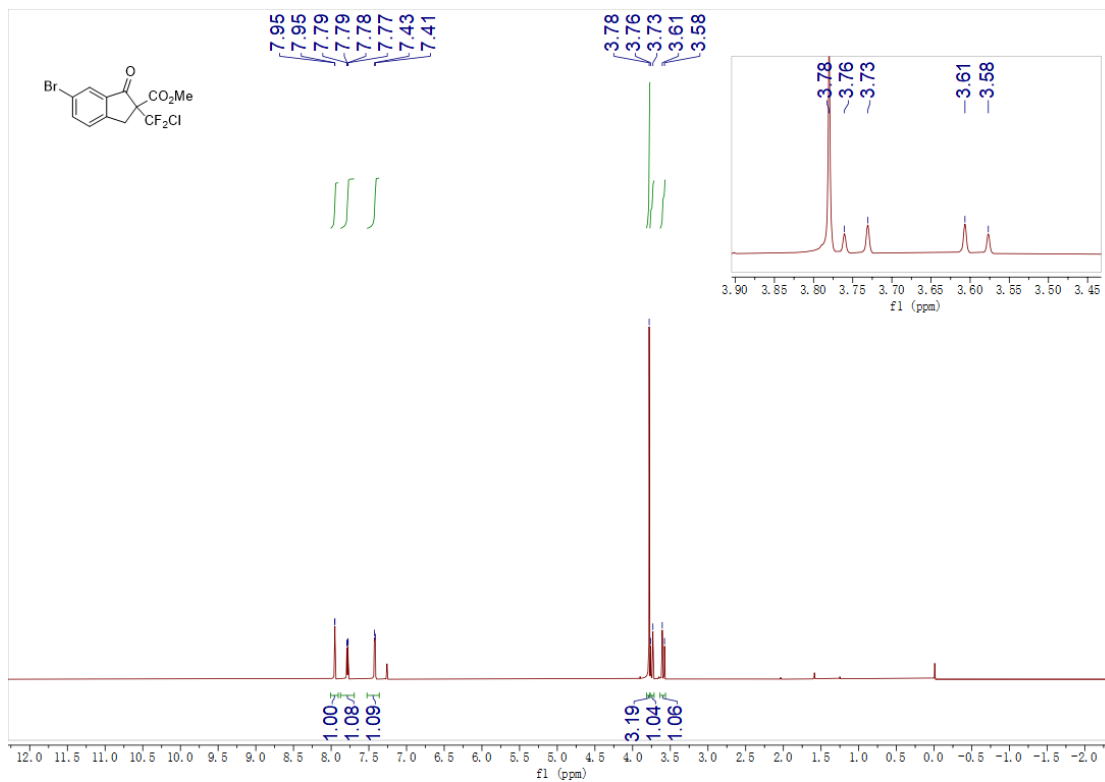

**<sup>13</sup>C NMR spectrum of methyl 6-bromo-2-(chlorodifluoromethyl)-1-oxo-2,3-dihydro-1H-indene-2-carboxylate 5d**

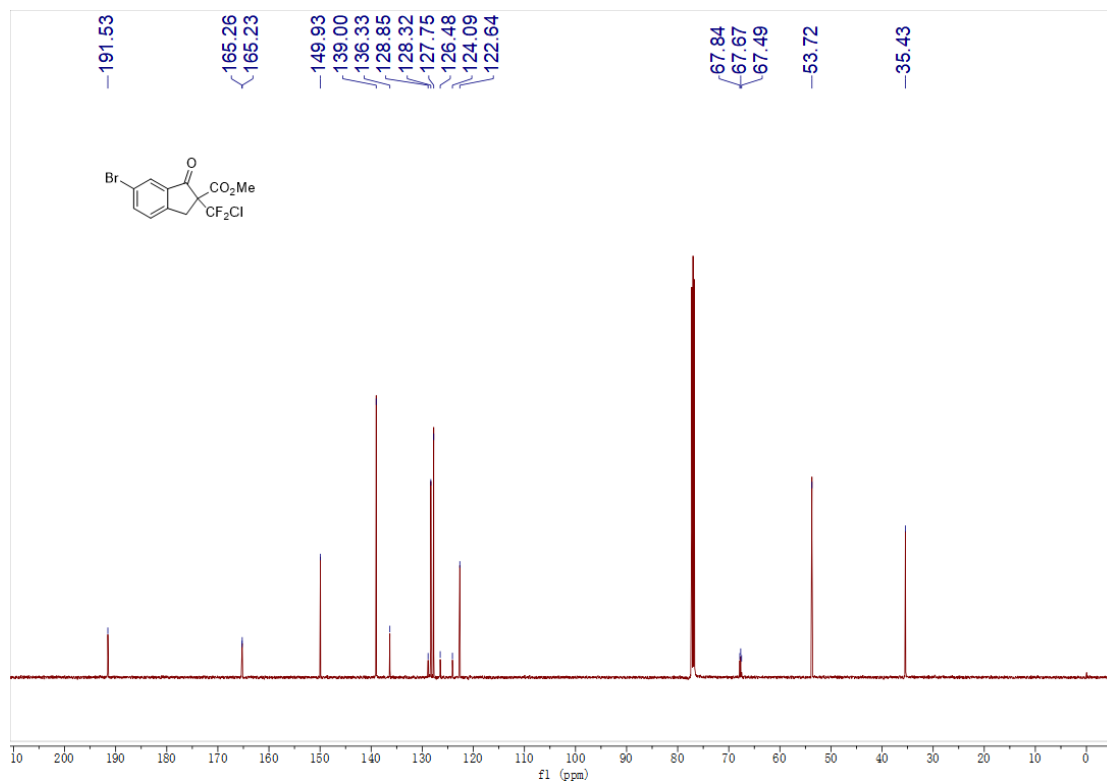

**<sup>19</sup>F NMR spectrum of methyl 6-bromo-2-(chlorodifluoromethyl)-1-oxo-2,3-dihydro-1H-indene-2-carboxylate 5d**

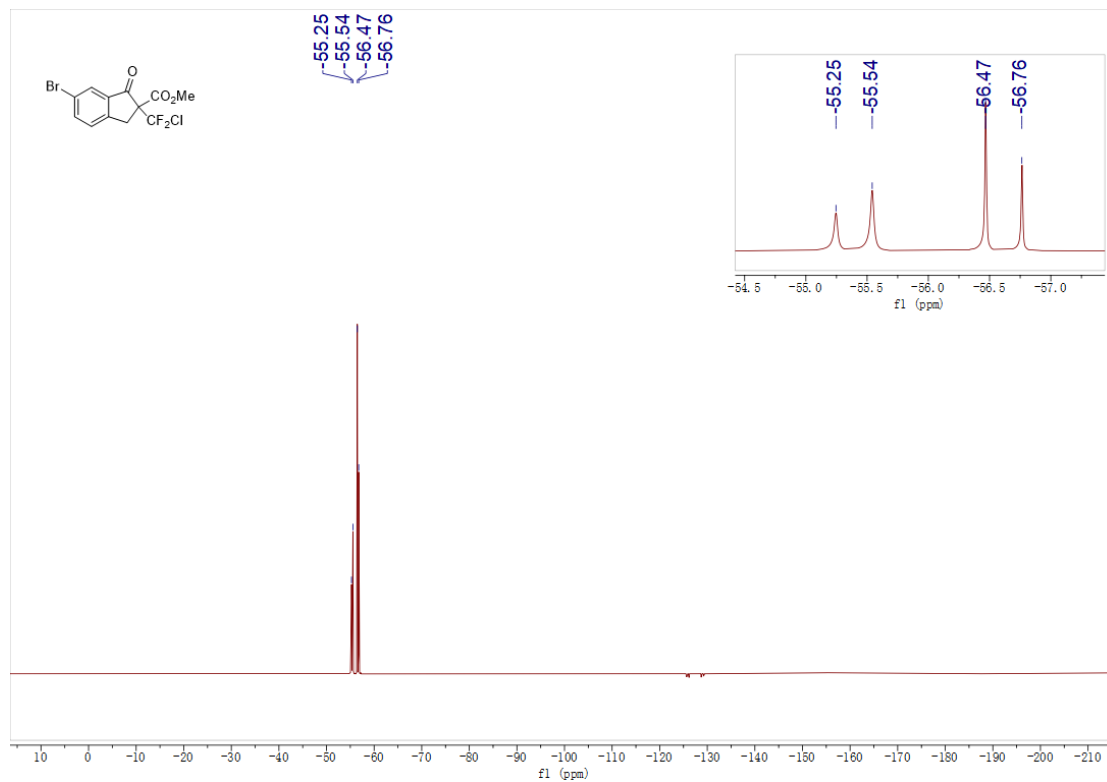

**<sup>1</sup>H NMR spectrum of methyl 2-(chlorodifluoromethyl)-5-fluoro-1-oxo-2,3-dihydro-1H-indene-2-carboxylate 5e**

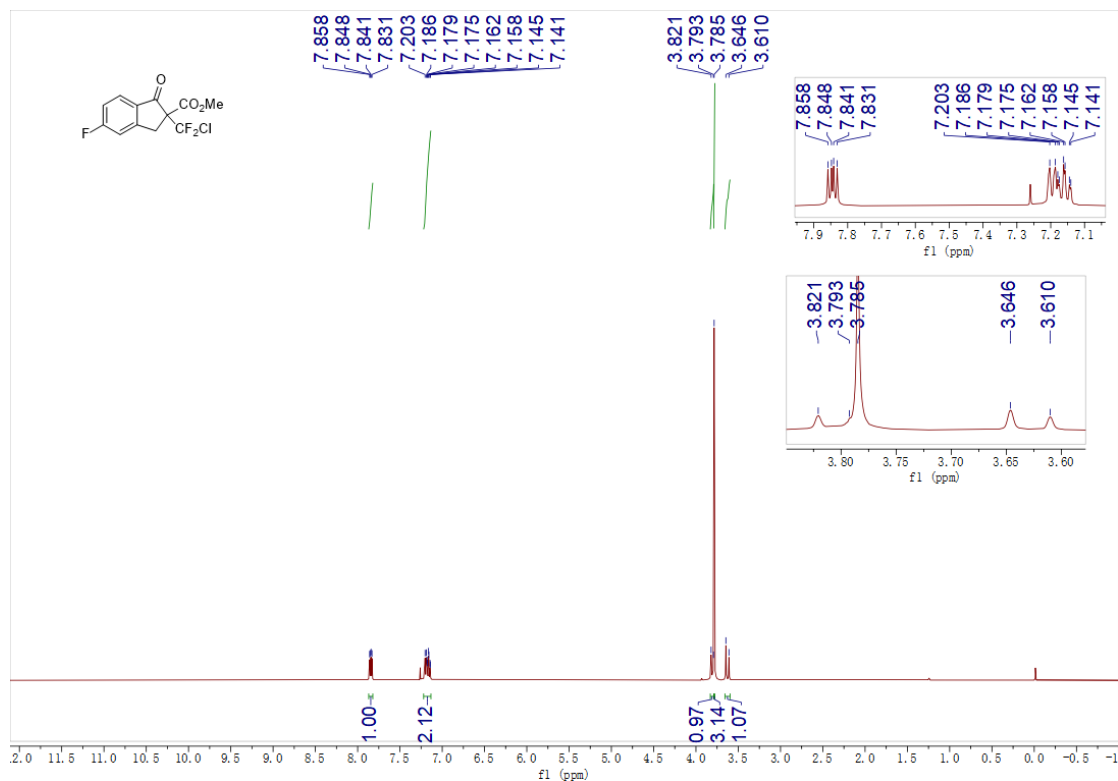

**<sup>13</sup>C NMR spectrum of methyl 2-(chlorodifluoromethyl)-5-fluoro-1-oxo-2,3-dihydro-1H-indene-2-carboxylate 5e**

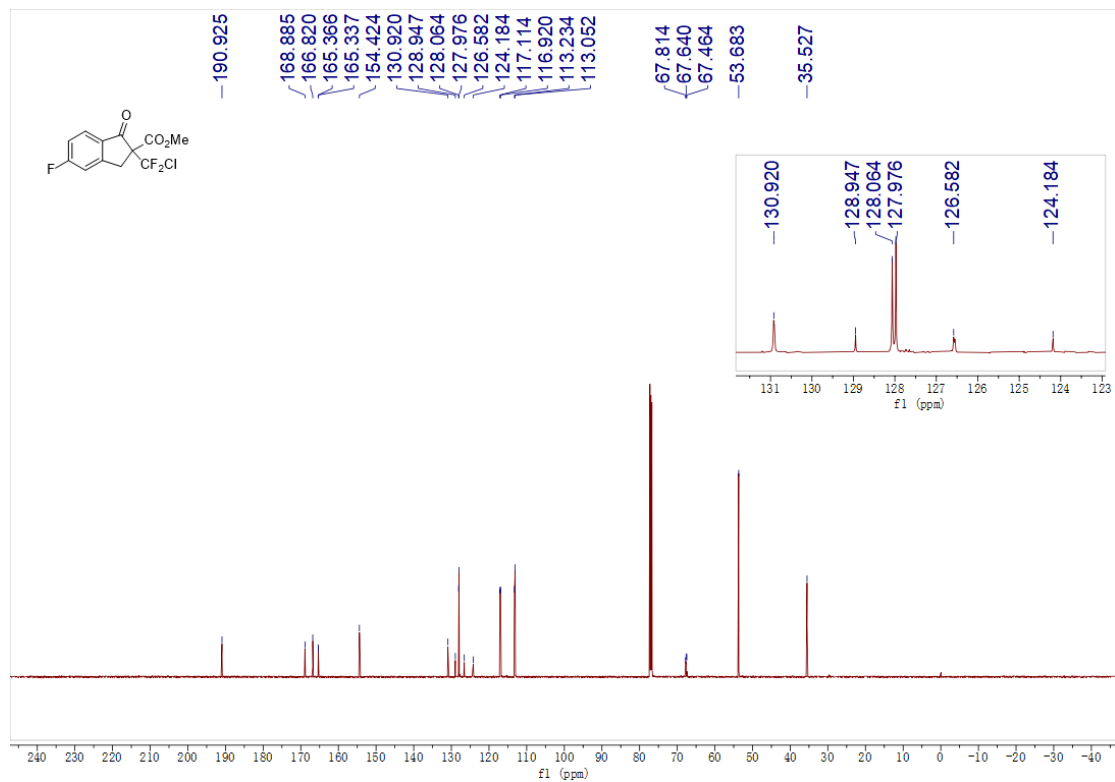

**<sup>19</sup>F NMR spectrum of methyl 2-(chlorodifluoromethyl)-5-fluoro-1-oxo-2,3-dihydro-1H-indene-2-carboxylate 5e**

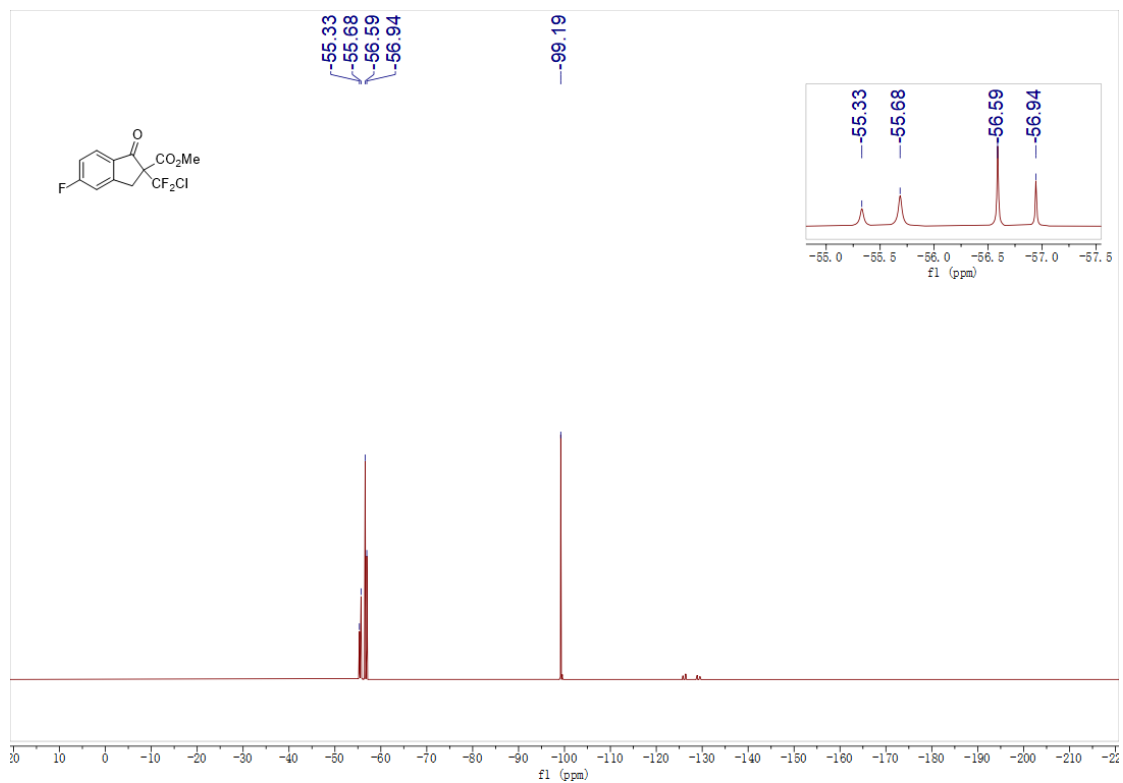

**<sup>1</sup>H NMR spectrum of methyl 5-chloro-2-(chlorodifluoromethyl)-1-oxo-2,3-dihydro-1H-indene-2-carboxylate 5f**

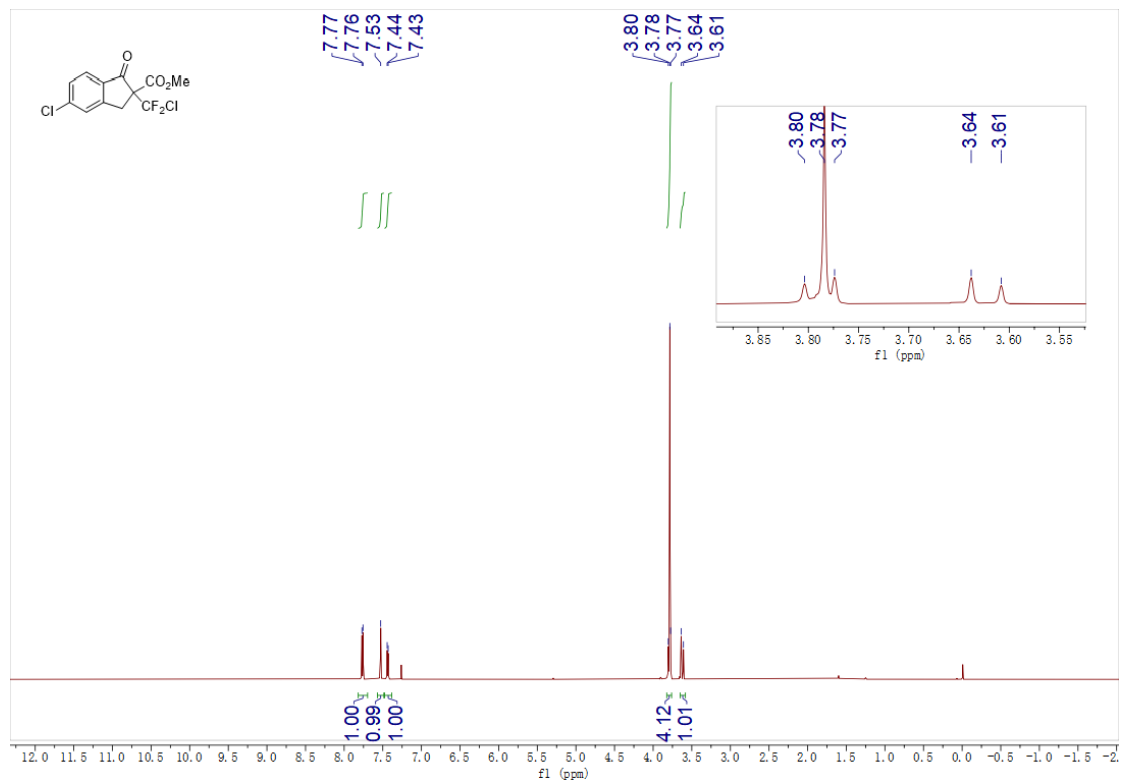

**<sup>13</sup>C NMR spectrum of methyl 5-chloro-2-(chlorodifluoromethyl)-1-oxo-2,3-dihydro-1H-indene-2-carboxylate 5f**

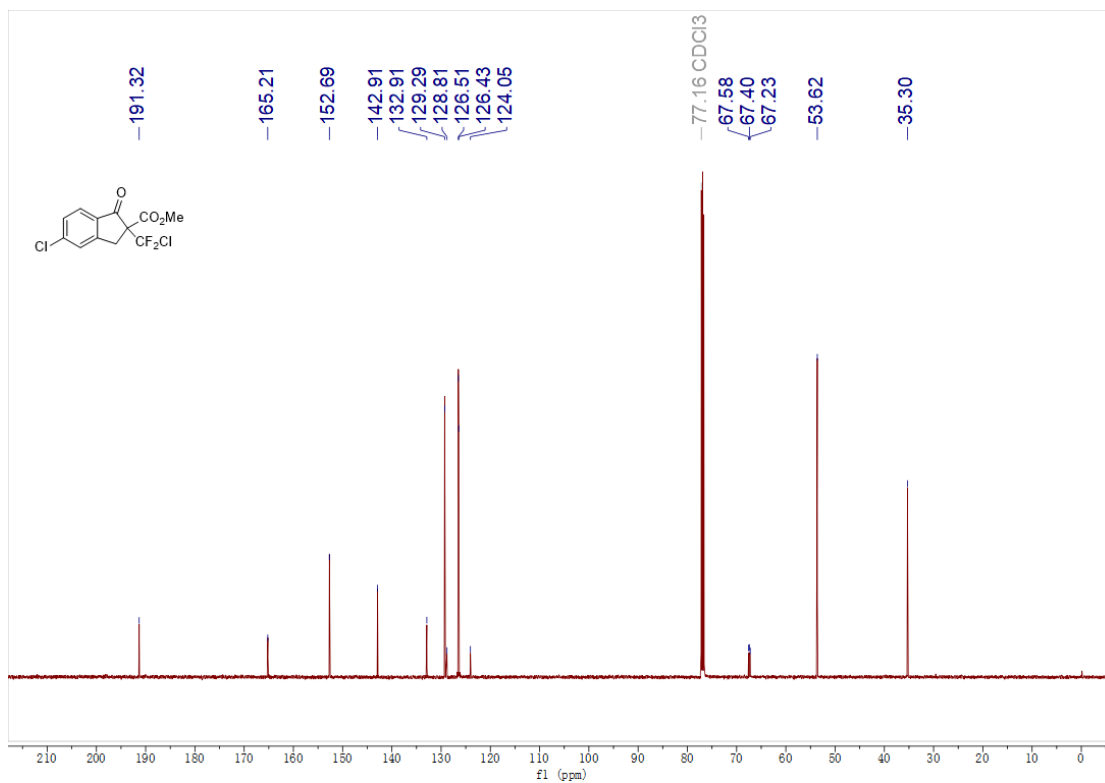

**<sup>19</sup>F NMR spectrum of methyl 5-chloro-2-(chlorodifluoromethyl)-1-oxo-2,3-dihydro-1H-indene-2-carboxylate 5f**

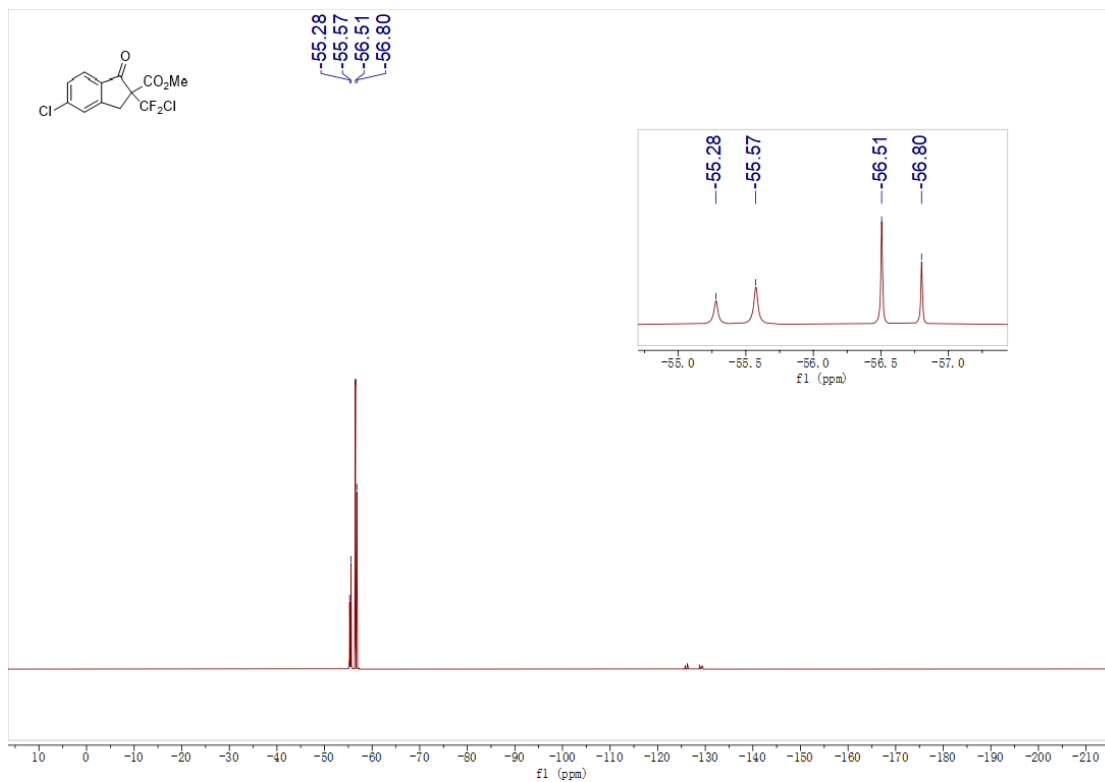



**<sup>1</sup>H NMR spectrum of methyl 5-bromo-2-(chlorodifluoromethyl)-1-oxo-2,3-dihydro-1H-indene-2-carboxylate 5g**

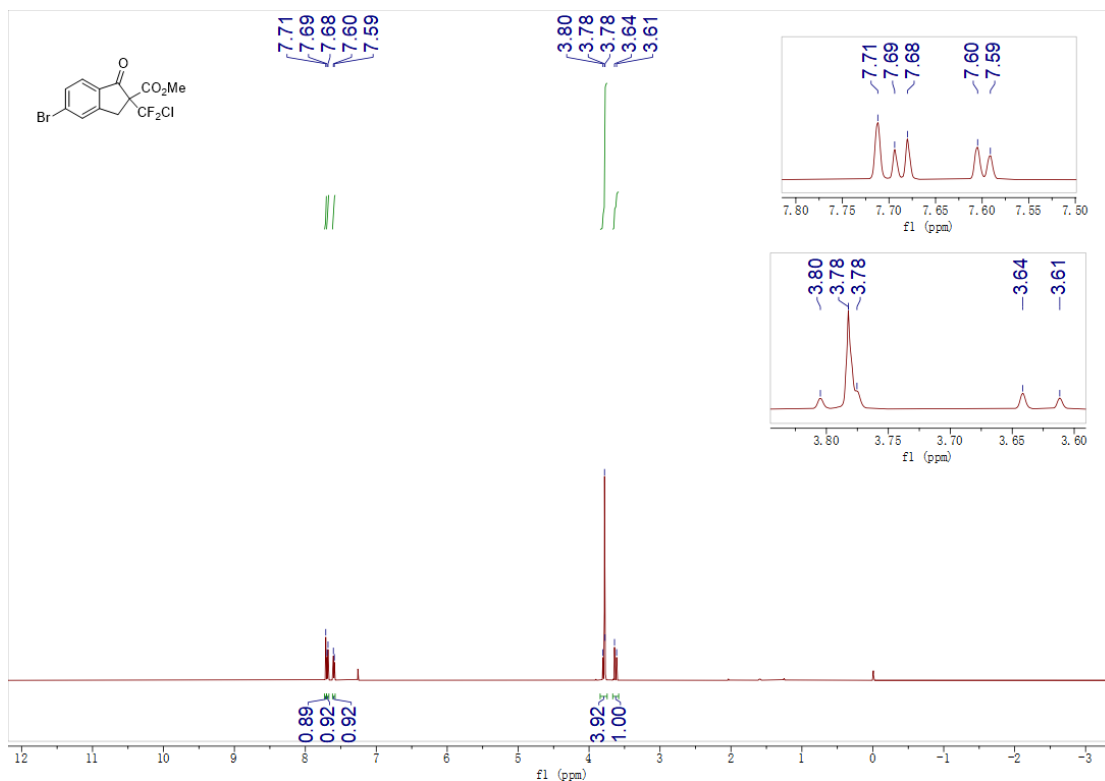

**<sup>13</sup>C NMR spectrum of methyl 5-bromo-2-(chlorodifluoromethyl)-1-oxo-2,3-dihydro-1H-indene-2-carboxylate 5g**

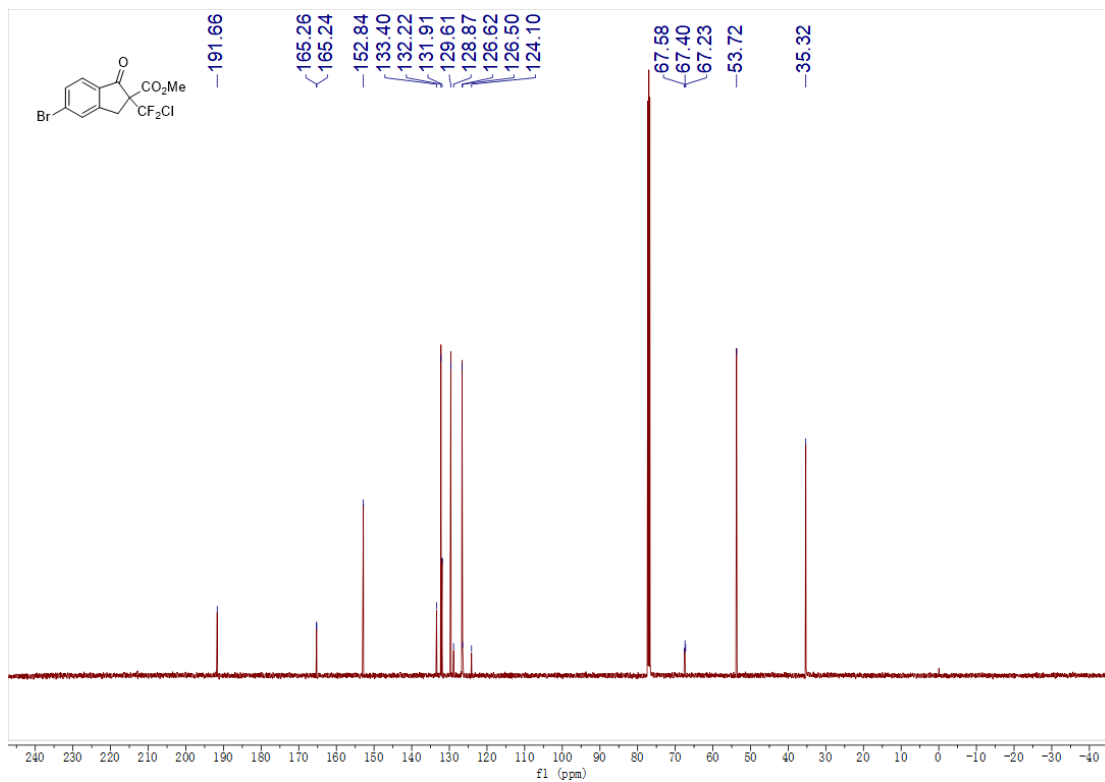

**$^{19}\text{F}$  NMR spectrum of methyl 5-bromo-2-(chlorodifluoromethyl)-1-oxo-2,3-dihydro-1*H*-indene-2-carboxylate **5g****

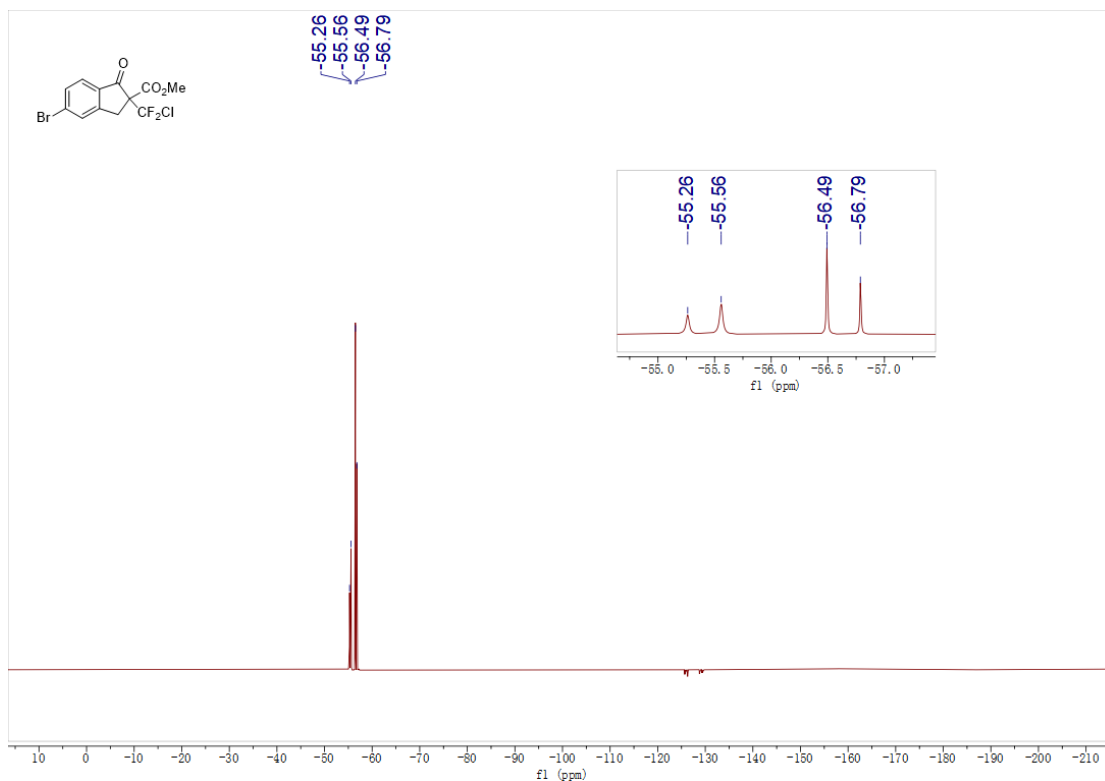

**$^1\text{H}$  NMR spectrum of methyl 2-(chlorodifluoromethyl)-5-methoxy-1-oxo-2,3-dihydro-1*H*-indene-2-carboxylate **5h****

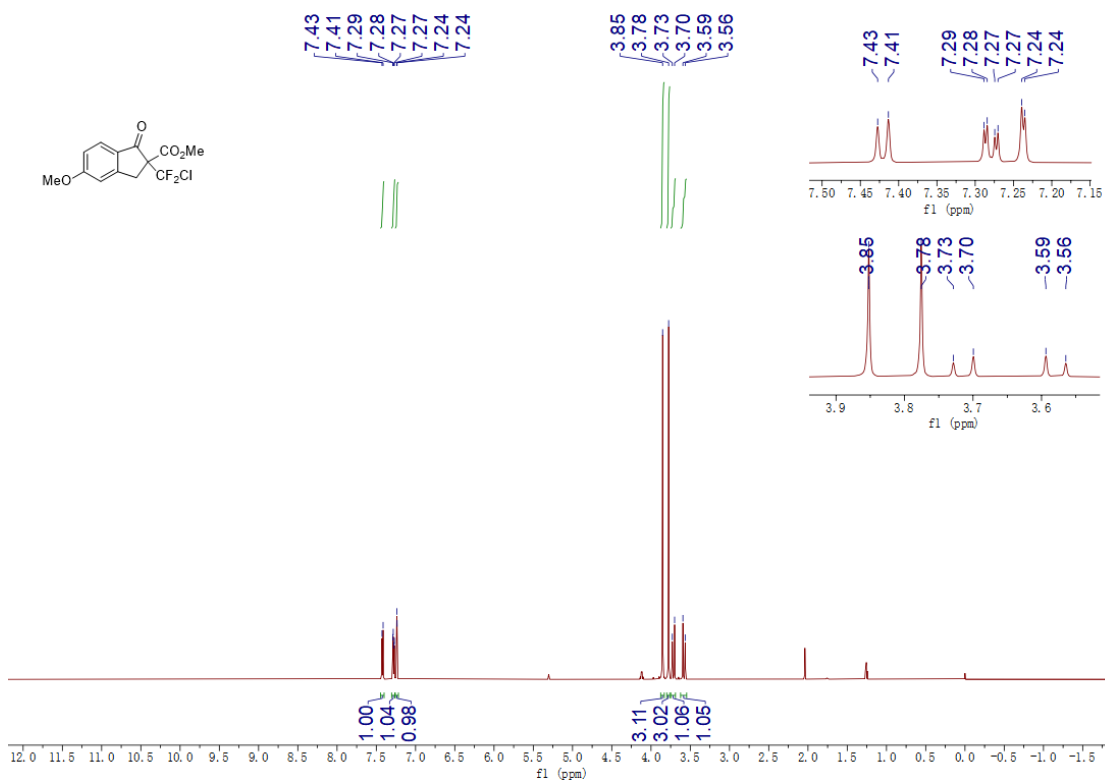

**<sup>13</sup>C NMR spectrum of methyl 2-(chlorodifluoromethyl)-5-methoxy-1-oxo-2,3-dihydro-1H-indene-2-carboxylate 5h**

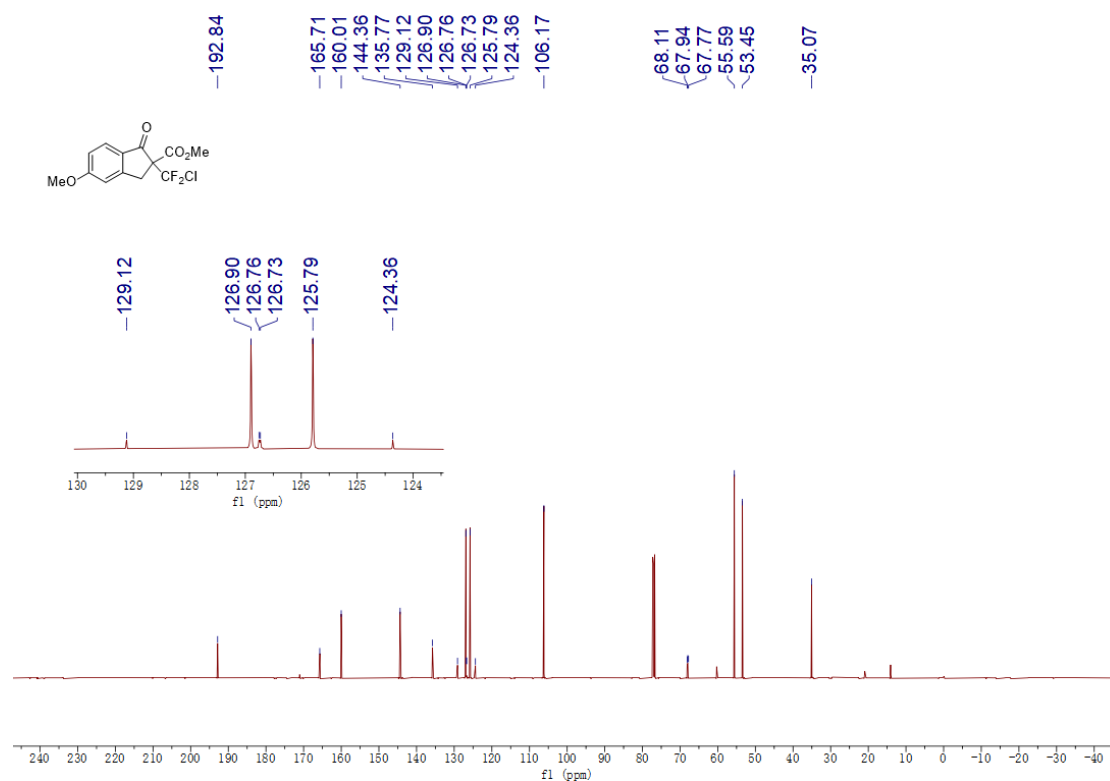

**<sup>19</sup>F NMR spectrum of methyl 2-(chlorodifluoromethyl)-5-methoxy-1-oxo-2,3-dihydro-1H-indene-2-carboxylate 5h**

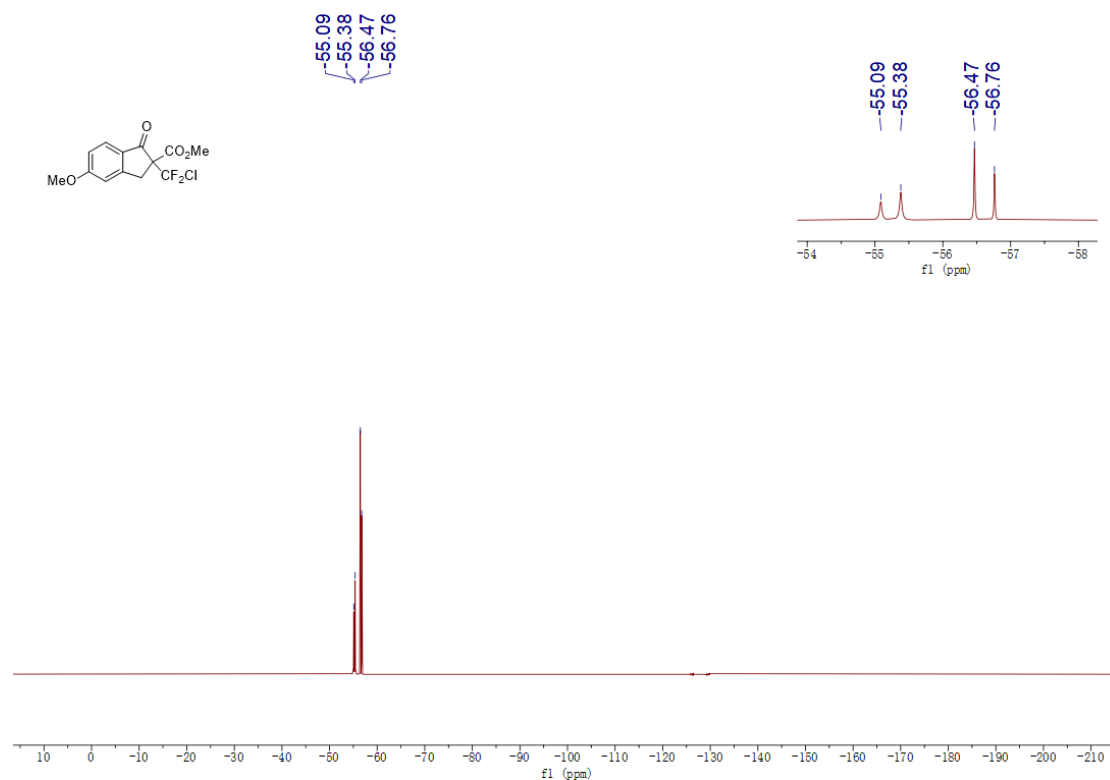

**<sup>1</sup>H NMR spectrum of methyl 2-(chlorodifluoromethyl)-1-oxo-5-(trifluoromethyl)-2,3-dihydro-1H-indene-2-carboxylate 5i**

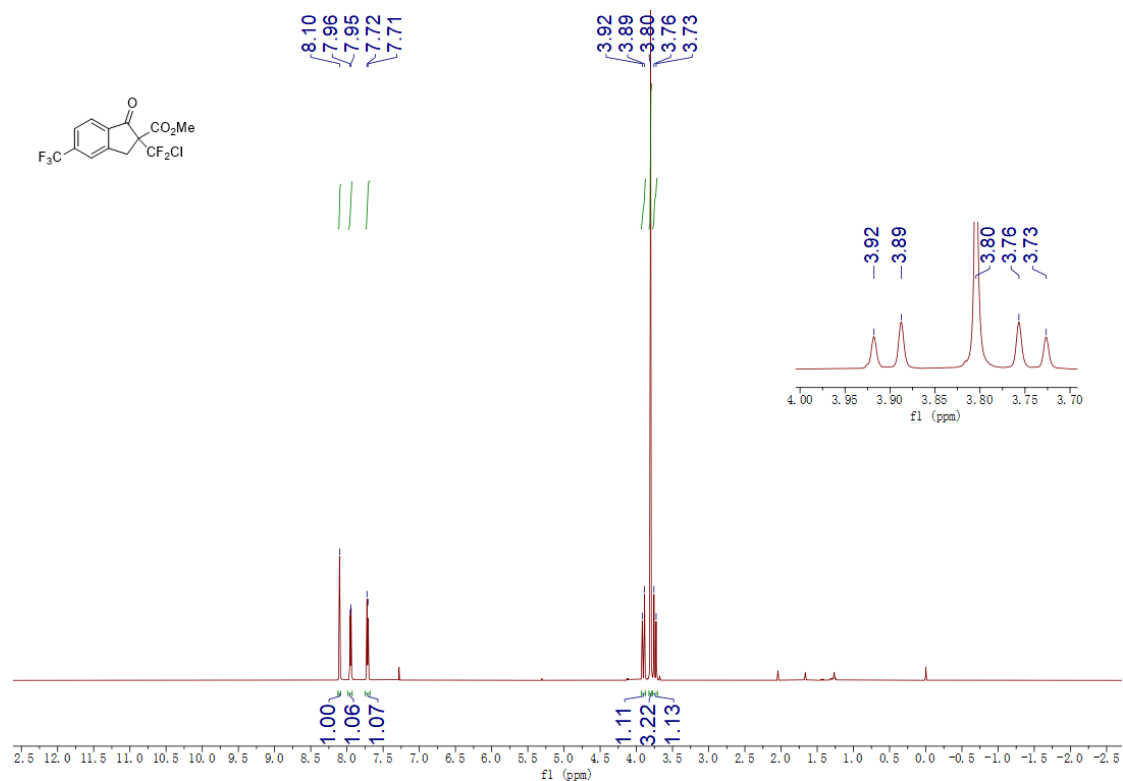

**<sup>13</sup>C NMR spectrum of methyl 2-(chlorodifluoromethyl)-1-oxo-5-(trifluoromethyl)-2,3-dihydro-1H-indene-2-carboxylate 5i**

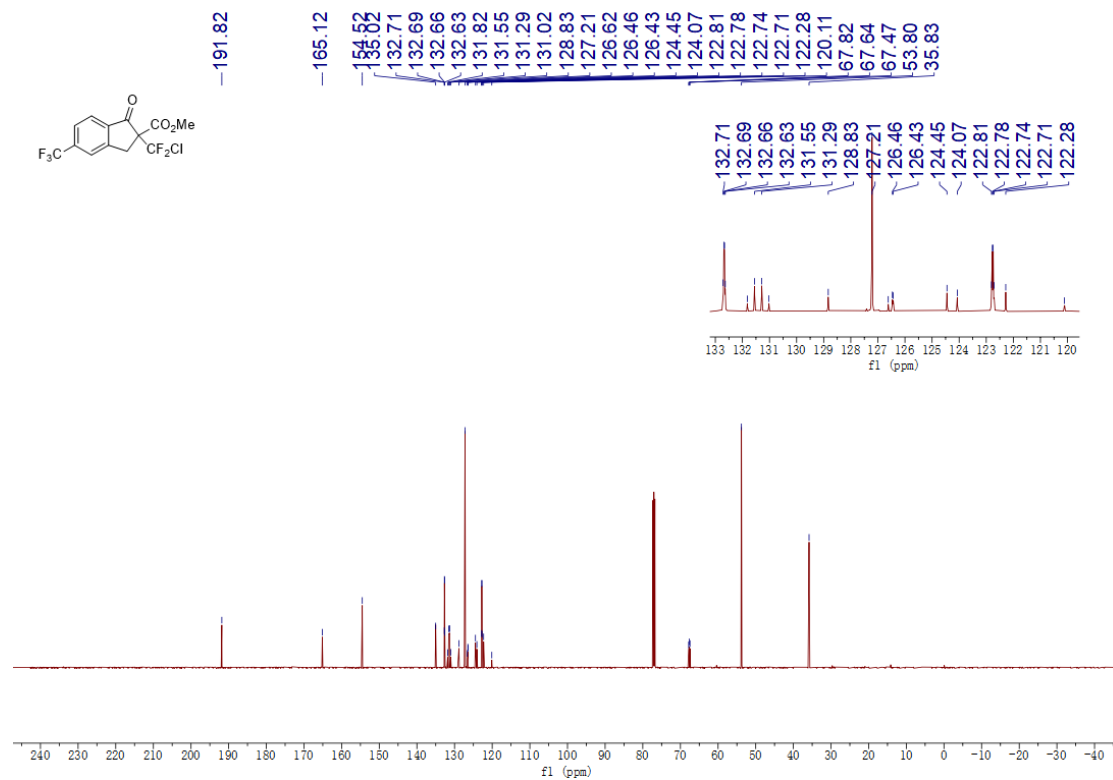

**<sup>19</sup>F NMR spectrum of methyl 2-(chlorodifluoromethyl)-1-oxo-5-(trifluoromethyl)-2,3-dihydro-1H-indene-2-carboxylate 5i**

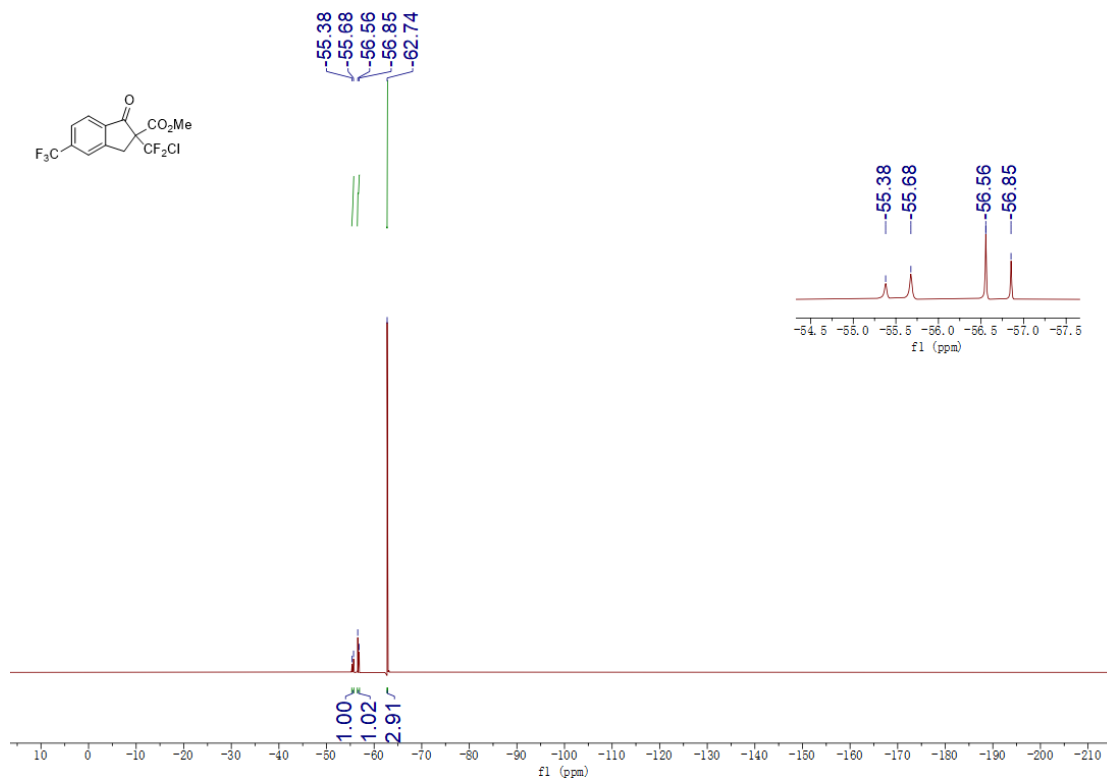

**<sup>1</sup>H NMR spectrum of ethyl 2-(chlorodifluoromethyl)-1-oxo-2,3-dihydro-1H-indene-2-carboxylate 5j**

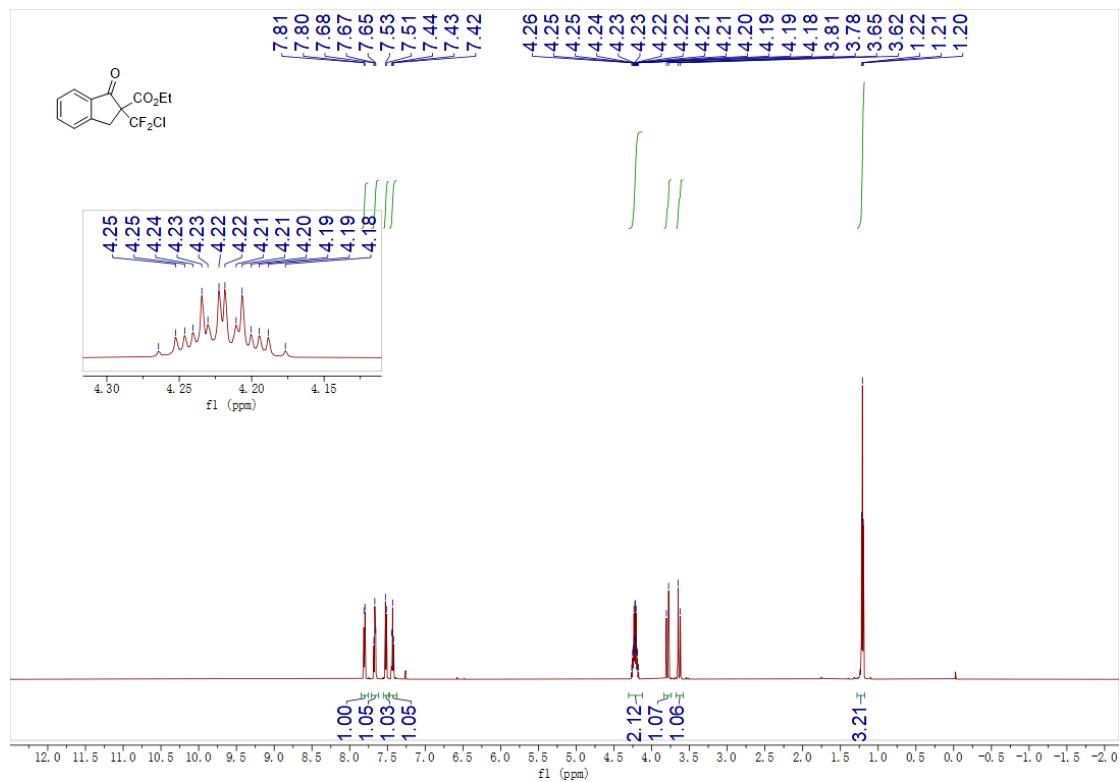

**<sup>13</sup>C NMR spectrum of ethyl 2-(chlorodifluoromethyl)-1-oxo-2,3-dihydro-1H-indene-2-carboxylate 5j**

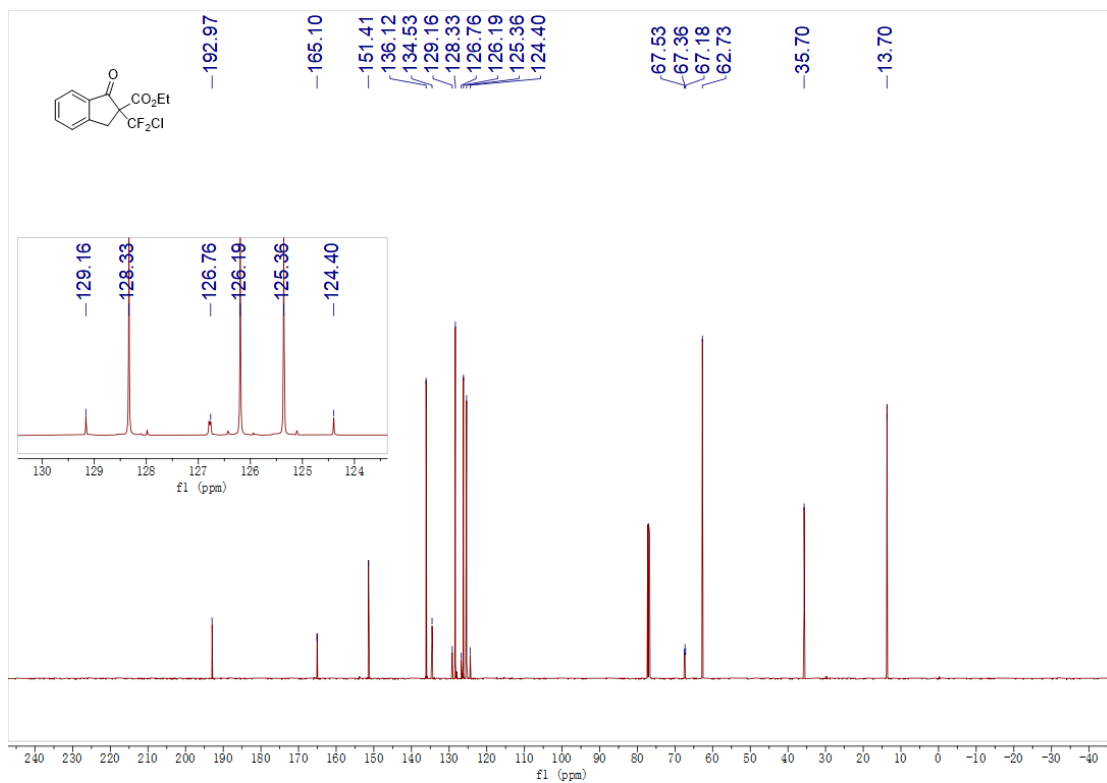

**<sup>19</sup>F NMR spectrum of ethyl 2-(chlorodifluoromethyl)-1-oxo-2,3-dihydro-1H-indene-2-carboxylate 5j**

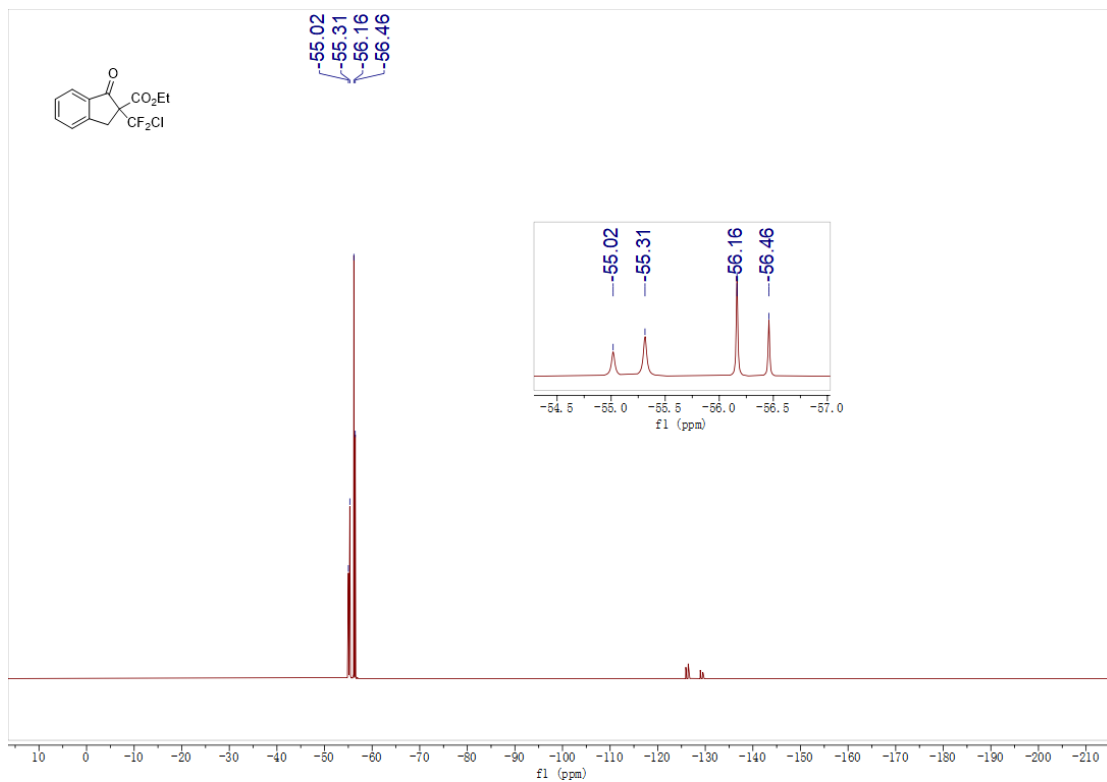

**<sup>1</sup>H NMR spectrum of (3s,5s,7s)-adamantan-1-yl 2-(chlorodifluoromethyl)-6-methyl-1-oxo-2,3-dihydro-1*H*-indene-2-carboxylate 5k**

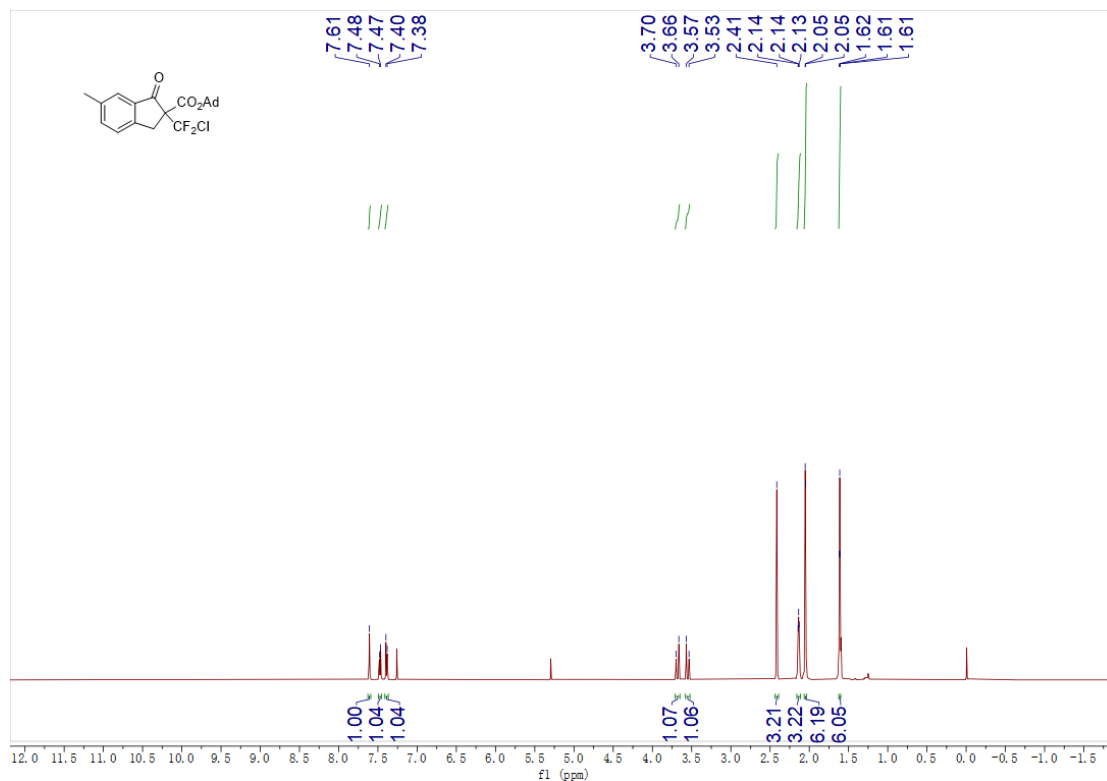

**<sup>13</sup>C NMR spectrum of (3s,5s,7s)-adamantan-1-yl 2-(chlorodifluoromethyl)-6-methyl-1-oxo-2,3-dihydro-1*H*-indene-2-carboxylate 5k**

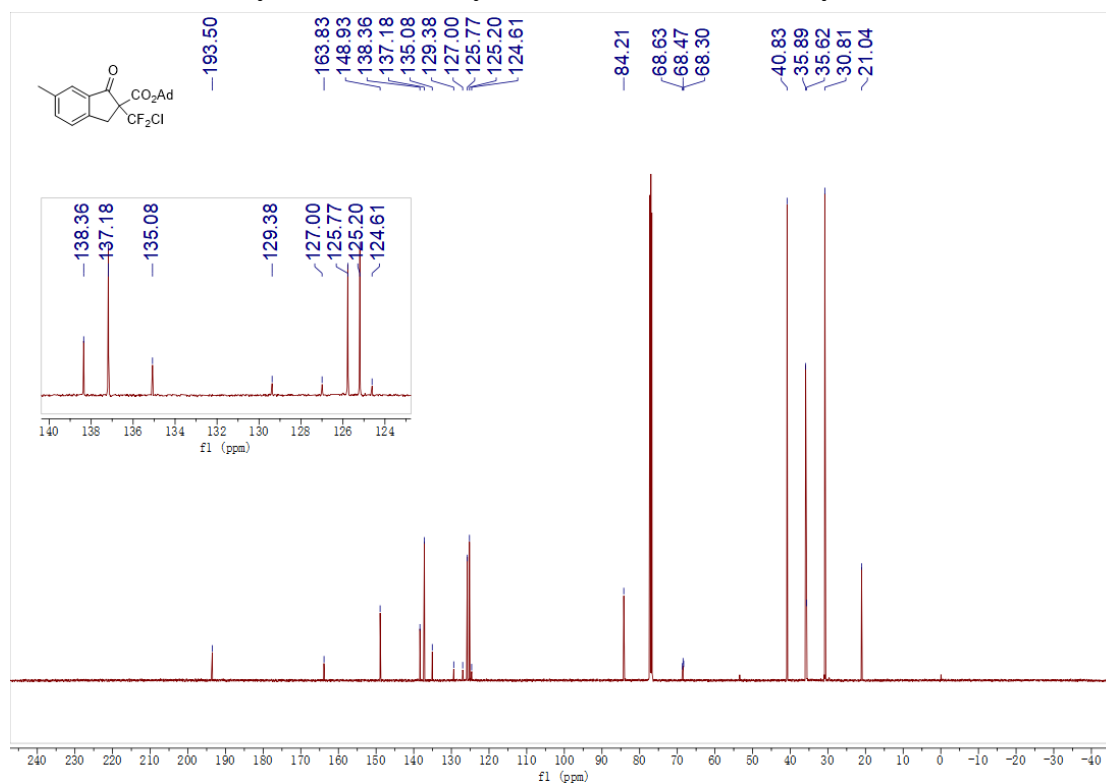

**$^{19}\text{F}$  NMR spectrum of (3s,5s,7s)-adamantan-1-yl 2-(chlorodifluoromethyl)-6-methyl-1-oxo-2,3-dihydro-1H-indene-2-carboxylate 5k**

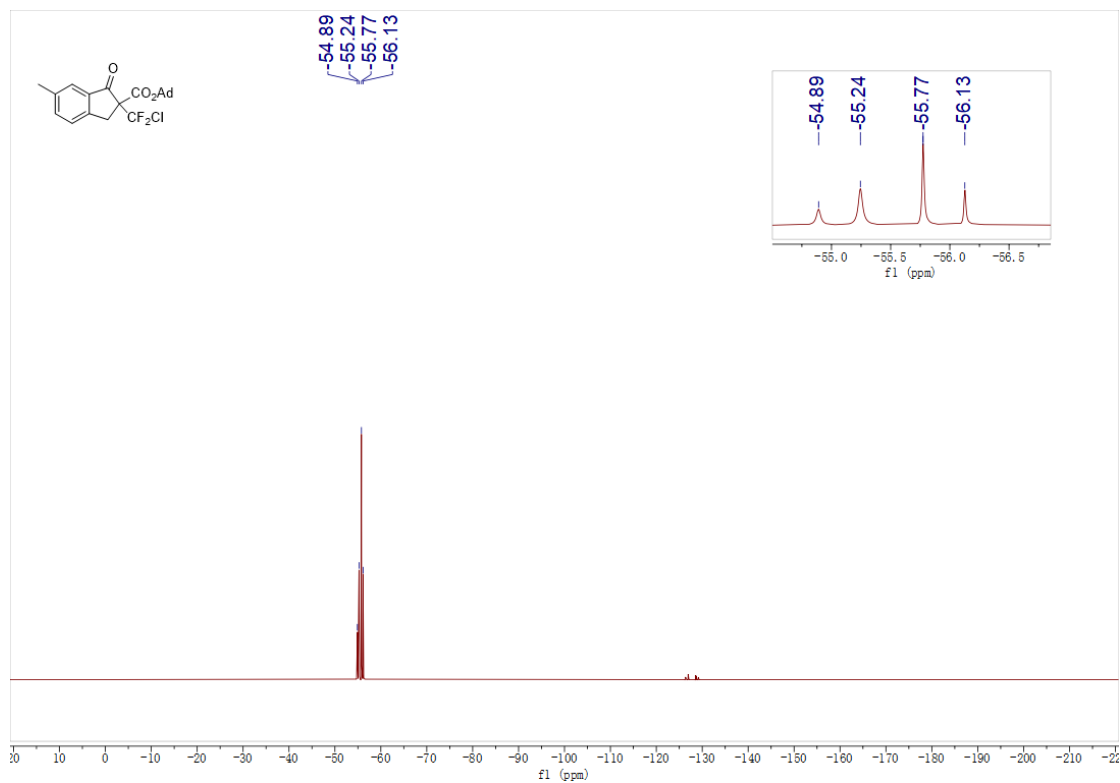

**$^1\text{H}$  NMR spectrum of 2,2-dimethyl-3,4-dihydronaphthalen-1(2H)-one 5l**

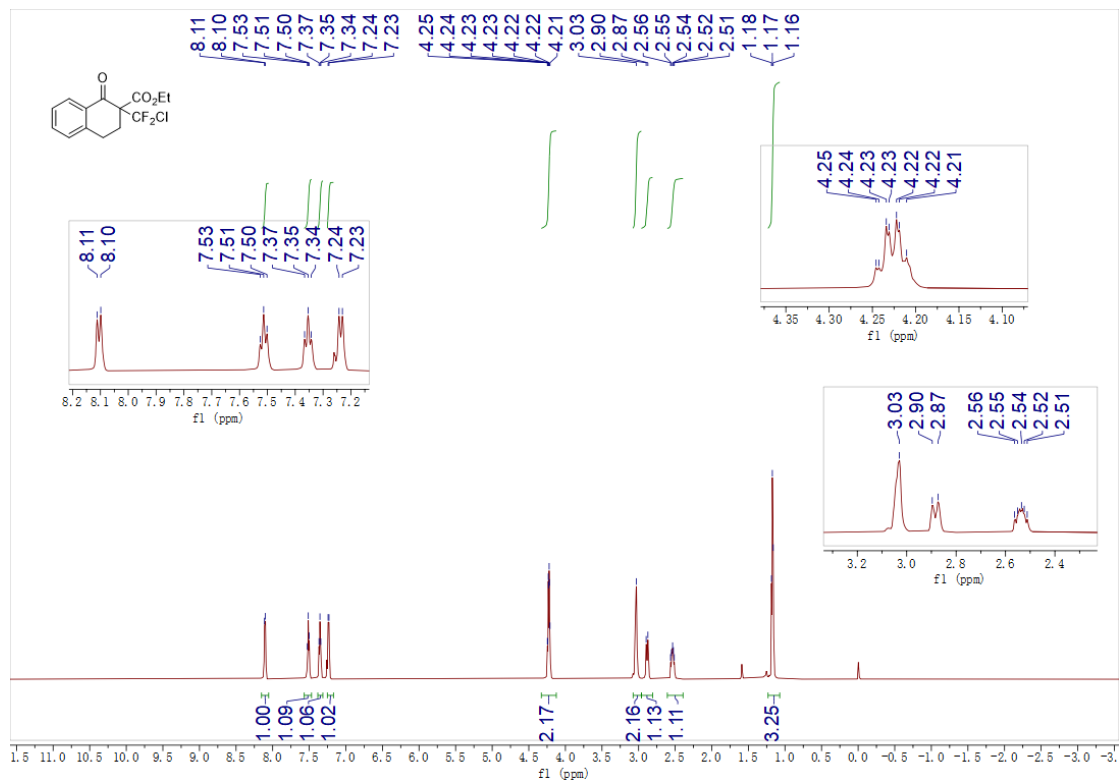



### <sup>13</sup>C NMR spectrum of 2,2-dimethyl-3,4-dihydronaphthalen-1(2H)-one 5l

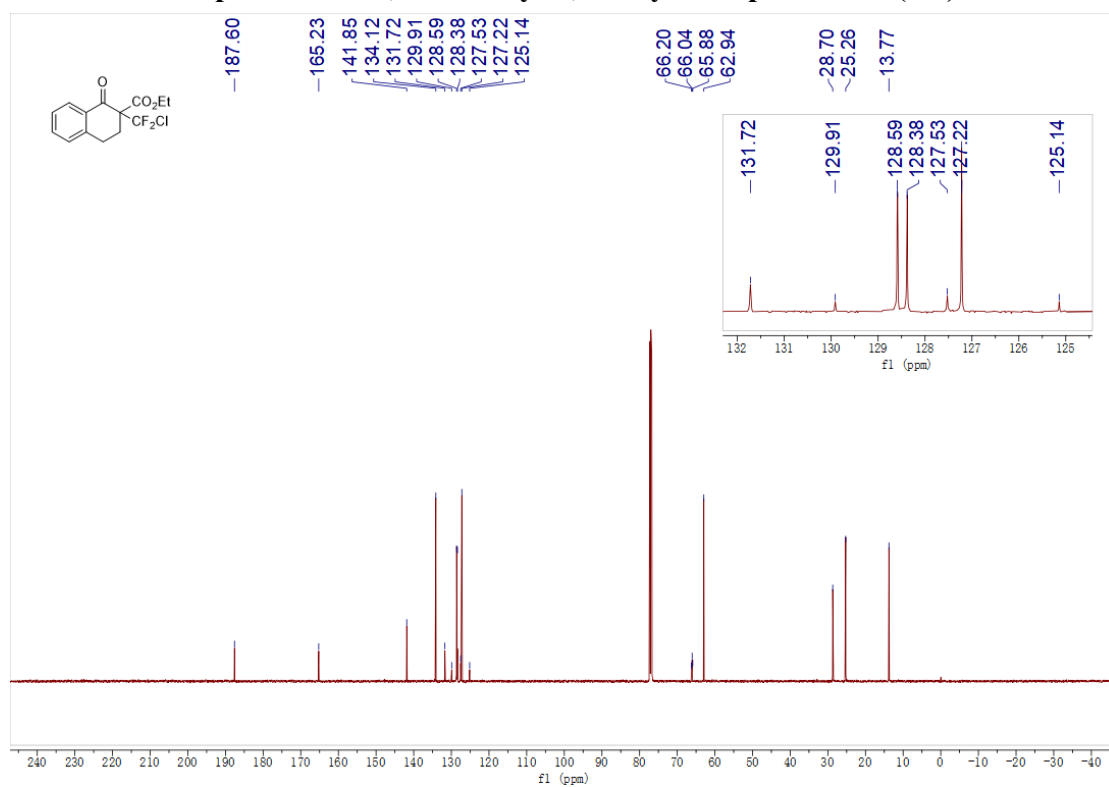

### <sup>19</sup>F NMR spectrum of 2,2-dimethyl-3,4-dihydronaphthalen-1(2H)-one 5l

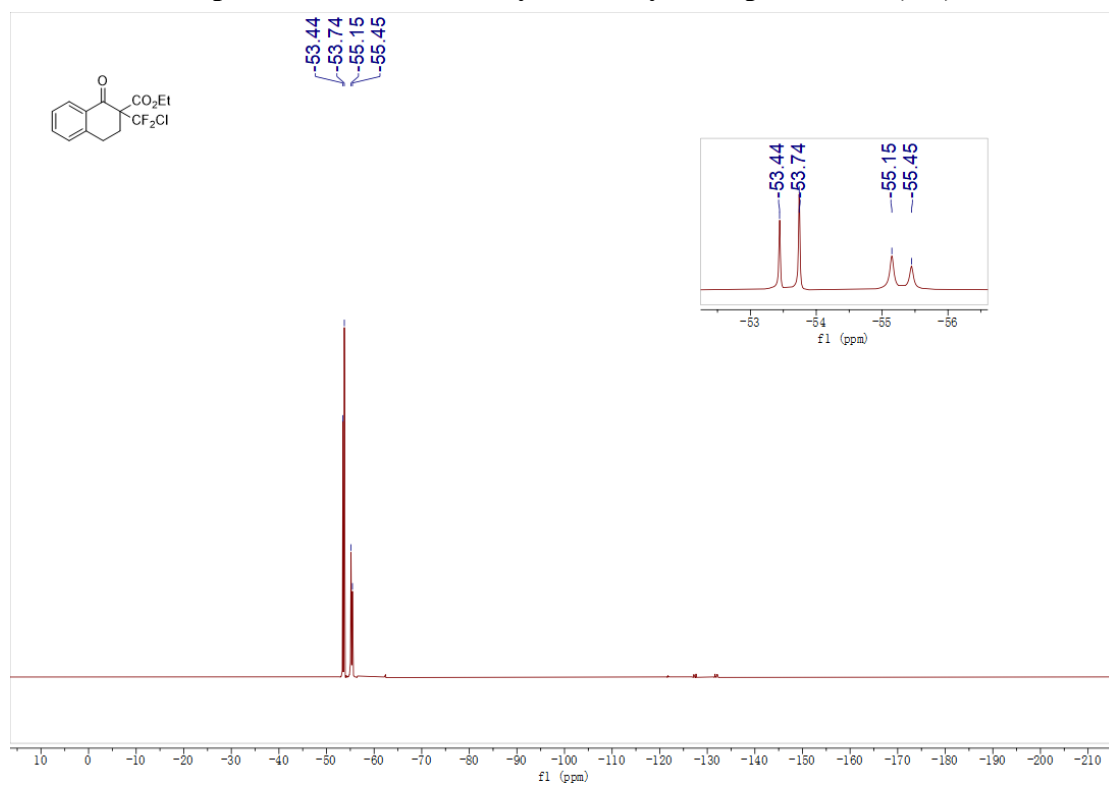

## X-Ray Diffraction Data of YlideFluor-CF<sub>2</sub>Cl

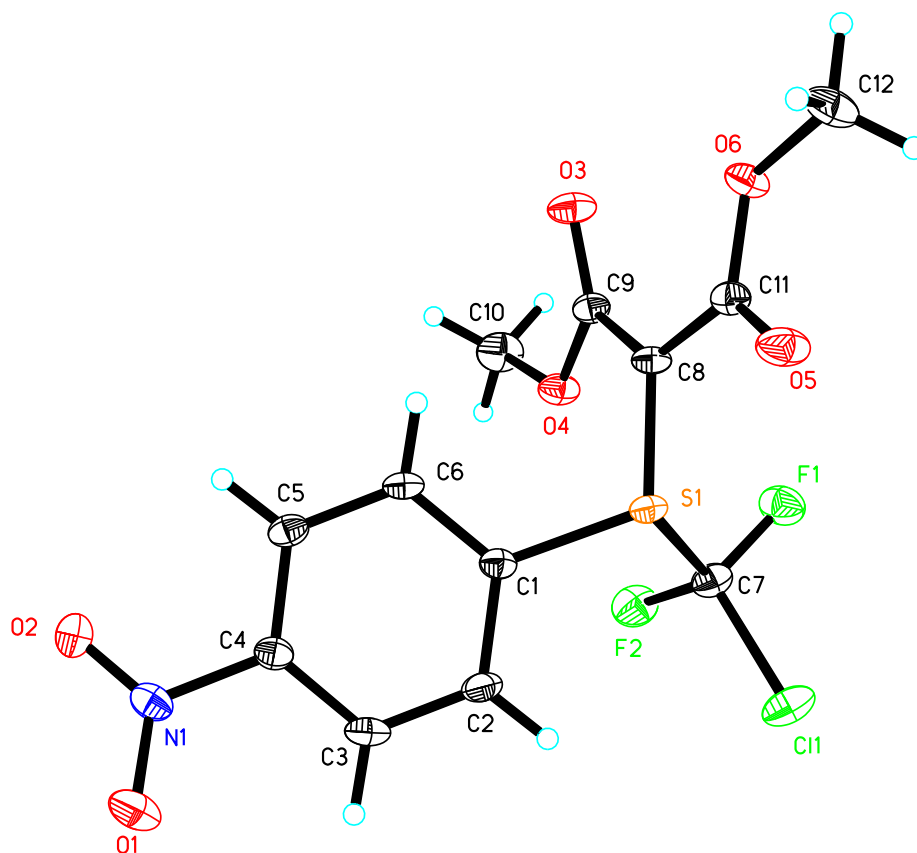

**Figure S4.** ORTEP diagrams of reagent **YlideFluor-CF<sub>2</sub>Cl**. Ellipsoids are shown at the 30% level.

**Table S5. Crystal data and structure refinement for mo\_d8v23103\_0m.**

|                                   |                                                                      |                   |
|-----------------------------------|----------------------------------------------------------------------|-------------------|
| Identification code               | mo_d8v23103_0m                                                       |                   |
| Empirical formula                 | C <sub>12</sub> H <sub>10</sub> Cl F <sub>2</sub> N O <sub>6</sub> S |                   |
| Formula weight                    | 369.72                                                               |                   |
| Temperature                       | 213(2) K                                                             |                   |
| Wavelength                        | 0.71073 Å                                                            |                   |
| Crystal system                    | Monoclinic                                                           |                   |
| Space group                       | C c                                                                  |                   |
| Unit cell dimensions              | a = 16.5250(5) Å                                                     | α = 90°.          |
|                                   | b = 12.9543(4) Å                                                     | β = 97.0120(10)°. |
|                                   | c = 6.9523(2) Å                                                      | γ = 90°.          |
| Volume                            | 1477.15(8) Å <sup>3</sup>                                            |                   |
| Z                                 | 4                                                                    |                   |
| Density (calculated)              | 1.662 Mg/m <sup>3</sup>                                              |                   |
| Absorption coefficient            | 0.453 mm <sup>-1</sup>                                               |                   |
| F(000)                            | 752                                                                  |                   |
| Crystal size                      | 0.200 x 0.160 x 0.120 mm <sup>3</sup>                                |                   |
| Theta range for data collection   | 4.009 to 25.494°.                                                    |                   |
| Index ranges                      | -18<=h<=20, -15<=k<=15, -8<=l<=8                                     |                   |
| Reflections collected             | 10261                                                                |                   |
| Independent reflections           | 2503 [R(int) = 0.0573]                                               |                   |
| Completeness to theta = 25.242°   | 98.7 %                                                               |                   |
| Absorption correction             | Semi-empirical from equivalents                                      |                   |
| Max. and min. transmission        | 0.7456 and 0.5049                                                    |                   |
| Refinement method                 | Full-matrix least-squares on F <sup>2</sup>                          |                   |
| Data / restraints / parameters    | 2503 / 2 / 211                                                       |                   |
| Goodness-of-fit on F <sup>2</sup> | 1.031                                                                |                   |
| Final R indices [I>2sigma(I)]     | R1 = 0.0301, wR2 = 0.0777                                            |                   |
| R indices (all data)              | R1 = 0.0309, wR2 = 0.0786                                            |                   |
| Absolute structure parameter      | 0.08(4)                                                              |                   |
| Extinction coefficient            | 0.013(3)                                                             |                   |
| Largest diff. peak and hole       | 0.248 and -0.163 e.Å <sup>-3</sup>                                   |                   |

**Table S6.** Atomic coordinates ( $\times 10^4$ ) and equivalent isotropic displacement parameters ( $\text{\AA}^2 \times 10^3$ ) for mo\_d8v23103\_0m. U(eq) is defined as one third of the trace of the orthogonalized  $U^{ij}$  tensor.

|       | x       | y       | z        | U(eq) |
|-------|---------|---------|----------|-------|
| Cl(1) | 4091(1) | 8542(1) | -164(2)  | 50(1) |
| S(1)  | 5090(1) | 7004(1) | 2228(1)  | 25(1) |
| F(1)  | 5549(1) | 8865(2) | 1280(4)  | 45(1) |
| F(2)  | 4646(1) | 8943(2) | 3288(3)  | 45(1) |
| O(1)  | 2332(2) | 5864(2) | 7997(4)  | 47(1) |
| O(2)  | 3400(2) | 5801(2) | 10147(4) | 42(1) |
| O(3)  | 7186(2) | 7135(2) | 5450(4)  | 38(1) |
| O(4)  | 6025(2) | 8055(2) | 5313(4)  | 32(1) |
| O(5)  | 6089(2) | 5791(2) | 140(4)   | 44(1) |
| O(6)  | 7279(1) | 6184(2) | 1887(4)  | 33(1) |
| N(1)  | 3070(2) | 5958(2) | 8505(4)  | 33(1) |
| C(1)  | 4516(2) | 6778(2) | 4217(5)  | 25(1) |
| C(2)  | 3685(2) | 7017(3) | 3950(5)  | 31(1) |
| C(3)  | 3215(2) | 6752(3) | 5381(6)  | 32(1) |
| C(4)  | 3580(2) | 6270(3) | 7018(5)  | 27(1) |
| C(5)  | 4403(2) | 6028(2) | 7304(5)  | 28(1) |
| C(6)  | 4875(2) | 6278(2) | 5855(5)  | 27(1) |
| C(7)  | 4865(2) | 8436(3) | 1760(5)  | 33(1) |
| C(8)  | 6095(2) | 6844(2) | 2916(5)  | 26(1) |
| C(9)  | 6512(2) | 7334(2) | 4650(5)  | 26(1) |
| C(10) | 6341(3) | 8559(3) | 7082(6)  | 45(1) |
| C(11) | 6464(2) | 6224(2) | 1520(5)  | 28(1) |
| C(12) | 7671(2) | 5575(3) | 520(6)   | 44(1) |

**Table S7.** Bond lengths [Å] and angles [°] for mo\_d8v23103\_0m.

---

|                |            |
|----------------|------------|
| Cl(1)-C(7)     | 1.740(4)   |
| S(1)-C(8)      | 1.684(3)   |
| S(1)-C(1)      | 1.794(3)   |
| S(1)-C(7)      | 1.912(3)   |
| F(1)-C(7)      | 1.337(4)   |
| F(2)-C(7)      | 1.336(4)   |
| O(1)-N(1)      | 1.234(4)   |
| O(2)-N(1)      | 1.221(4)   |
| O(3)-C(9)      | 1.210(4)   |
| O(4)-C(9)      | 1.351(4)   |
| O(4)-C(10)     | 1.434(4)   |
| O(5)-C(11)     | 1.214(4)   |
| O(6)-C(11)     | 1.341(4)   |
| O(6)-C(12)     | 1.448(4)   |
| N(1)-C(4)      | 1.468(4)   |
| C(1)-C(6)      | 1.380(5)   |
| C(1)-C(2)      | 1.399(4)   |
| C(2)-C(3)      | 1.378(5)   |
| C(2)-H(2)      | 0.9400     |
| C(3)-C(4)      | 1.372(5)   |
| C(3)-H(3)      | 0.9400     |
| C(4)-C(5)      | 1.387(5)   |
| C(5)-C(6)      | 1.385(5)   |
| C(5)-H(5)      | 0.9400     |
| C(6)-H(6)      | 0.9400     |
| C(8)-C(11)     | 1.450(5)   |
| C(8)-C(9)      | 1.459(4)   |
| C(10)-H(10A)   | 0.9700     |
| C(10)-H(10B)   | 0.9700     |
| C(10)-H(10C)   | 0.9700     |
| C(12)-H(12A)   | 0.9700     |
| C(12)-H(12B)   | 0.9700     |
| C(12)-H(12C)   | 0.9700     |
| C(8)-S(1)-C(1) | 110.89(16) |
| C(8)-S(1)-C(7) | 109.39(16) |
| C(1)-S(1)-C(7) | 100.33(15) |

|                     |            |
|---------------------|------------|
| C(9)-O(4)-C(10)     | 116.0(3)   |
| C(11)-O(6)-C(12)    | 114.6(3)   |
| O(2)-N(1)-O(1)      | 124.4(3)   |
| O(2)-N(1)-C(4)      | 118.4(3)   |
| O(1)-N(1)-C(4)      | 117.2(3)   |
| C(6)-C(1)-C(2)      | 122.0(3)   |
| C(6)-C(1)-S(1)      | 119.9(2)   |
| C(2)-C(1)-S(1)      | 117.7(3)   |
| C(3)-C(2)-C(1)      | 118.7(3)   |
| C(3)-C(2)-H(2)      | 120.7      |
| C(1)-C(2)-H(2)      | 120.7      |
| C(4)-C(3)-C(2)      | 118.9(3)   |
| C(4)-C(3)-H(3)      | 120.6      |
| C(2)-C(3)-H(3)      | 120.6      |
| C(3)-C(4)-C(5)      | 123.1(3)   |
| C(3)-C(4)-N(1)      | 118.5(3)   |
| C(5)-C(4)-N(1)      | 118.3(3)   |
| C(6)-C(5)-C(4)      | 118.2(3)   |
| C(6)-C(5)-H(5)      | 120.9      |
| C(4)-C(5)-H(5)      | 120.9      |
| C(1)-C(6)-C(5)      | 119.1(3)   |
| C(1)-C(6)-H(6)      | 120.4      |
| C(5)-C(6)-H(6)      | 120.4      |
| F(2)-C(7)-F(1)      | 108.3(3)   |
| F(2)-C(7)-Cl(1)     | 109.1(2)   |
| F(1)-C(7)-Cl(1)     | 109.9(3)   |
| F(2)-C(7)-S(1)      | 114.0(3)   |
| F(1)-C(7)-S(1)      | 107.0(2)   |
| Cl(1)-C(7)-S(1)     | 108.43(19) |
| C(11)-C(8)-C(9)     | 126.8(3)   |
| C(11)-C(8)-S(1)     | 111.0(2)   |
| C(9)-C(8)-S(1)      | 122.1(2)   |
| O(3)-C(9)-O(4)      | 122.9(3)   |
| O(3)-C(9)-C(8)      | 127.1(3)   |
| O(4)-C(9)-C(8)      | 110.0(3)   |
| O(4)-C(10)-H(10A)   | 109.5      |
| O(4)-C(10)-H(10B)   | 109.5      |
| H(10A)-C(10)-H(10B) | 109.5      |

|                     |          |
|---------------------|----------|
| O(4)-C(10)-H(10C)   | 109.5    |
| H(10A)-C(10)-H(10C) | 109.5    |
| H(10B)-C(10)-H(10C) | 109.5    |
| O(5)-C(11)-O(6)     | 122.4(3) |
| O(5)-C(11)-C(8)     | 124.7(3) |
| O(6)-C(11)-C(8)     | 112.9(3) |
| O(6)-C(12)-H(12A)   | 109.5    |
| O(6)-C(12)-H(12B)   | 109.5    |
| H(12A)-C(12)-H(12B) | 109.5    |
| O(6)-C(12)-H(12C)   | 109.5    |
| H(12A)-C(12)-H(12C) | 109.5    |
| H(12B)-C(12)-H(12C) | 109.5    |

---

Symmetry transformations used to generate equivalent atoms:

**Table S8.** Anisotropic displacement parameters ( $\text{\AA}^2 \times 10^3$ ) for mo\_d8v23103\_0m. The anisotropic displacement factor exponent takes the form:  $-2\pi^2 [ h^2 a^{*2}U^{11} + \dots + 2 h k a^* b^* U^{12} ]$

|       | U <sup>11</sup> | U <sup>22</sup> | U <sup>33</sup> | U <sup>23</sup> | U <sup>13</sup> | U <sup>12</sup> |
|-------|-----------------|-----------------|-----------------|-----------------|-----------------|-----------------|
| Cl(1) | 48(1)           | 45(1)           | 53(1)           | 5(1)            | -14(1)          | 12(1)           |
| S(1)  | 19(1)           | 27(1)           | 27(1)           | -3(1)           | -3(1)           | 4(1)            |
| F(1)  | 36(1)           | 38(1)           | 60(2)           | 6(1)            | 8(1)            | -3(1)           |
| F(2)  | 50(2)           | 37(1)           | 48(1)           | -7(1)           | 4(1)            | 13(1)           |
| O(1)  | 29(1)           | 60(2)           | 55(2)           | -12(1)          | 9(1)            | -6(1)           |
| O(2)  | 44(2)           | 43(2)           | 40(2)           | 11(1)           | 6(1)            | 0(1)            |
| O(3)  | 25(1)           | 41(1)           | 46(2)           | -8(1)           | -9(1)           | 4(1)            |
| O(4)  | 24(1)           | 35(1)           | 33(1)           | -12(1)          | -2(1)           | 1(1)            |
| O(5)  | 29(1)           | 57(2)           | 42(2)           | -19(1)          | -4(1)           | 6(1)            |
| O(6)  | 23(1)           | 38(1)           | 40(1)           | -10(1)          | 7(1)            | 3(1)            |
| N(1)  | 27(2)           | 30(1)           | 42(2)           | -6(1)           | 8(1)            | -3(1)           |
| C(1)  | 20(2)           | 28(2)           | 28(2)           | -3(1)           | 0(1)            | 0(1)            |
| C(2)  | 23(2)           | 39(2)           | 30(2)           | -1(1)           | -4(1)           | 7(1)            |
| C(3)  | 18(2)           | 36(2)           | 39(2)           | -7(2)           | -2(1)           | 4(1)            |
| C(4)  | 23(2)           | 27(2)           | 31(2)           | -4(1)           | 1(1)            | -2(1)           |
| C(5)  | 25(2)           | 25(2)           | 31(2)           | -3(1)           | -5(1)           | -1(1)           |
| C(6)  | 17(2)           | 29(2)           | 33(2)           | -3(1)           | -4(1)           | 3(1)            |
| C(7)  | 32(2)           | 30(2)           | 36(2)           | 0(1)            | -2(1)           | 6(1)            |
| C(8)  | 16(2)           | 29(2)           | 33(2)           | -2(1)           | -2(1)           | 1(1)            |
| C(9)  | 22(2)           | 26(2)           | 30(2)           | -2(1)           | -2(1)           | -1(1)           |
| C(10) | 42(2)           | 50(2)           | 41(2)           | -20(2)          | -3(2)           | 2(2)            |
| C(11) | 24(2)           | 25(2)           | 34(2)           | 1(1)            | 2(1)            | 2(1)            |
| C(12) | 32(2)           | 46(2)           | 56(2)           | -18(2)          | 12(2)           | 6(2)            |



**Table S9.** Hydrogen coordinates ( $\times 10^4$ ) and isotropic displacement parameters ( $\text{\AA}^2 \times 10^3$ ) for mo\_d8v23103\_0m.

|        | x    | y    | z    | U(eq) |
|--------|------|------|------|-------|
| H(2)   | 3451 | 7351 | 2817 | 37    |
| H(3)   | 2653 | 6899 | 5238 | 38    |
| H(5)   | 4635 | 5704 | 8450 | 33    |
| H(6)   | 5432 | 6108 | 5986 | 32    |
| H(10A) | 6844 | 8913 | 6904 | 67    |
| H(10B) | 6447 | 8050 | 8105 | 67    |
| H(10C) | 5946 | 9057 | 7435 | 67    |
| H(12A) | 7522 | 5841 | -779 | 66    |
| H(12B) | 7497 | 4862 | 577  | 66    |
| H(12C) | 8258 | 5614 | 847  | 66    |

**Table S10.** Torsion angles [°] for mo\_d8v23103\_0m.

---

|                       |           |
|-----------------------|-----------|
| C(8)-S(1)-C(1)-C(6)   | -15.7(3)  |
| C(7)-S(1)-C(1)-C(6)   | -131.2(3) |
| C(8)-S(1)-C(1)-C(2)   | 171.5(3)  |
| C(7)-S(1)-C(1)-C(2)   | 55.9(3)   |
| C(6)-C(1)-C(2)-C(3)   | 0.7(5)    |
| S(1)-C(1)-C(2)-C(3)   | 173.4(3)  |
| C(1)-C(2)-C(3)-C(4)   | 0.4(5)    |
| C(2)-C(3)-C(4)-C(5)   | -0.4(5)   |
| C(2)-C(3)-C(4)-N(1)   | -177.9(3) |
| O(2)-N(1)-C(4)-C(3)   | -159.9(3) |
| O(1)-N(1)-C(4)-C(3)   | 20.7(4)   |
| O(2)-N(1)-C(4)-C(5)   | 22.5(4)   |
| O(1)-N(1)-C(4)-C(5)   | -156.9(3) |
| C(3)-C(4)-C(5)-C(6)   | -0.6(5)   |
| N(1)-C(4)-C(5)-C(6)   | 176.8(3)  |
| C(2)-C(1)-C(6)-C(5)   | -1.8(5)   |
| S(1)-C(1)-C(6)-C(5)   | -174.3(2) |
| C(4)-C(5)-C(6)-C(1)   | 1.7(5)    |
| C(1)-S(1)-C(8)-C(11)  | 133.8(2)  |
| C(7)-S(1)-C(8)-C(11)  | -116.5(2) |
| C(1)-S(1)-C(8)-C(9)   | -49.5(3)  |
| C(7)-S(1)-C(8)-C(9)   | 60.3(3)   |
| C(10)-O(4)-C(9)-O(3)  | -2.0(5)   |
| C(10)-O(4)-C(9)-C(8)  | 176.6(3)  |
| C(11)-C(8)-C(9)-O(3)  | -17.5(6)  |
| S(1)-C(8)-C(9)-O(3)   | 166.3(3)  |
| C(11)-C(8)-C(9)-O(4)  | 164.0(3)  |
| S(1)-C(8)-C(9)-O(4)   | -12.2(4)  |
| C(12)-O(6)-C(11)-O(5) | -0.7(5)   |
| C(12)-O(6)-C(11)-C(8) | -179.8(3) |
| C(9)-C(8)-C(11)-O(5)  | 176.5(3)  |
| S(1)-C(8)-C(11)-O(5)  | -6.9(4)   |
| C(9)-C(8)-C(11)-O(6)  | -4.3(5)   |
| S(1)-C(8)-C(11)-O(6)  | 172.3(2)  |

---

Symmetry transformations used to generate equivalent atoms:

**Table S11.** Hydrogen bonds for mo\_d8v23103\_0m [ $\text{\AA}$  and  $^\circ$ ].

| D-H...A               | d(D-H) | d(H...A) | d(D...A) | $\angle(\text{DHA})$ |
|-----------------------|--------|----------|----------|----------------------|
| C(12)-H(12B)...O(3)#1 | 0.97   | 2.64     | 3.600(5) | 172.2                |
| C(5)-H(5)...O(5)#2    | 0.94   | 2.55     | 3.225(4) | 129.4                |
| C(2)-H(2)...O(3)#3    | 0.94   | 2.58     | 3.433(4) | 150.5                |
| C(2)-H(2)...Cl(1)     | 0.94   | 2.89     | 3.606(4) | 134.4                |
| C(12)-H(12B)...O(3)#1 | 0.97   | 2.64     | 3.600(5) | 172.2                |
| C(5)-H(5)...O(5)#2    | 0.94   | 2.55     | 3.225(4) | 129.4                |
| C(2)-H(2)...O(3)#3    | 0.94   | 2.58     | 3.433(4) | 150.5                |
| C(2)-H(2)...Cl(1)     | 0.94   | 2.89     | 3.606(4) | 134.4                |
| C(2)-H(2)...Cl(1)     | 0.94   | 2.89     | 3.606(4) | 134.4                |
| C(2)-H(2)...O(3)#3    | 0.94   | 2.58     | 3.433(4) | 150.5                |
| C(5)-H(5)...O(5)#2    | 0.94   | 2.55     | 3.225(4) | 129.4                |
| C(12)-H(12B)...O(3)#1 | 0.97   | 2.64     | 3.600(5) | 172.2                |

Symmetry transformations used to generate equivalent atoms:

#1  $x, -y+1, z-1/2$     #2  $x, y, z+1$     #3  $x-1/2, -y+3/2, z-1/2$
